# Supplementary material for: Catalyst-free Friedel–Crafts hydroxyalkylation of imidazo[1,2-α]pyridines with ethyl trifluoropyruvate
Source: Royal Society of Chemistry journal article supplement (doi:10.1039/c5ra15678e), 2015-01-01

## Supplementary Information

### Catalyst-Free Friedel-Crafts Hydroxyalkylation of Imidazo[1,2-*a*]pyridines with Ethyl Trifluoropyruvate

Ke Li, Xue-Mei Zhao, Fa-Liu Yang, Xiao-Han Hou, Yan Xu, Yan-Chun Guo, Xin-Qi Hao\*,  
Mao-Ping Song\*

*College of Chemistry and Molecular Engineering, Henan Key Laboratory of Chemical Biology and Organic Chemistry, Zhengzhou University, No. 100 of Science Road, Zhengzhou 450001, People's Republic of China. E-mail, mpsong@zzu.edu.cn (M.-P. Song) and xqhao@zzu.edu.cn (X.-Q. Hao)*

#### Table of Contents:

|                                                |     |
|------------------------------------------------|-----|
| Experimental Section.....                      | S2  |
| General procedure.....                         | S2  |
| References.....                                | S2  |
| Crystallographic Details for <b>3aa</b> .....  | S3  |
| Characterization data of all products.....     | S4  |
| Copies of the NMR Spectra of all products..... | S16 |

## Experimental Section

Solvents were dried with standard methods and freshly distilled prior to use if needed. Unless otherwise noted, all the starting materials were commercially available and used without further purification. 2-phenylimidazo[1,2- $\alpha$ ]pyridines were prepared by following literature reports.<sup>[1]</sup> All reactions were carried out using Schlenk techniques. Melting points were measured on a melting point apparatus and are uncorrected. <sup>1</sup> H, <sup>13</sup> C and <sup>19</sup> F NMR spectra were all recorded using TMS as an internal standard. Data are reported as follows: chemical shift (  $\delta$  ppm), multiplicity (s = single, d = doublet, t = triplet, q = quartet, m = multiplet), integration, and coupling constants in hertz (Hz). HRMS were determined on a Q-ToF Micro MS/MS System ESI spectrometer.

### **General Procedure for the Friedel-Crafts hydroxyalkylation of imidazo[1,2- $\alpha$ ]pyridines with Ethyl Trifluoropyruvate:**

To a stirred solution of 2-Phenylimidazo[1,2- $\alpha$ ]pyridines (0.1 mmol) in isopropyl ether (1.0 mL), ethyl trifluoropyruvate (26.5  $\mu$ L, 0.2 mmol) was added under argon atmosphere. The mixture was stirred at room temperature or 60 °C for 10 - 48 h. Then the solvent was removed in vacuo, and the residue was purified by thin-layer chromatography (PE/EtOAc) to give product as a white solid.

## References

- [1] (a) A. K. Bagdi, M. Rahman, S. Santra, A. Majee, A. Hajra, *Adv. Synth. Catal.*, 2013, **355**, 1741 - 1747; (b) S. Y. Takizawa, J. I. Nishida, T. Tsuzuki, S. Tokito, Y. Yamashita, *Inorg. Chem.*, 2007, **46**, 4308 - 4319.

**Table 1 Crystal data and structure refinement for 3aa.**

---

|                                             |                                                                              |
|---------------------------------------------|------------------------------------------------------------------------------|
| Empirical formula                           | C <sub>20</sub> H <sub>21</sub> F <sub>3</sub> N <sub>2</sub> O <sub>4</sub> |
| Formula weight                              | 410.39                                                                       |
| Temperature/K                               | 291.15                                                                       |
| Crystal system                              | monoclinic                                                                   |
| Space group                                 | P2 <sub>1</sub> /c                                                           |
| a/Å                                         | 10.8633(5)                                                                   |
| b/Å                                         | 12.9671(4)                                                                   |
| c/Å                                         | 14.6615(5)                                                                   |
| $\alpha$ /°                                 | 90                                                                           |
| $\beta$ /°                                  | 104.876(4)                                                                   |
| $\gamma$ /°                                 | 90                                                                           |
| Volume/Å <sup>3</sup>                       | 1996.08(13)                                                                  |
| Z                                           | 4                                                                            |
| $\rho_{\text{calc}}$ /cm <sup>3</sup>       | 1.366                                                                        |
| $\mu$ /mm <sup>-1</sup>                     | 0.975                                                                        |
| F(000)                                      | 856.0                                                                        |
| Crystal size/mm <sup>3</sup>                | 0.2 × 0.18 × 0.18                                                            |
| Radiation                                   | CuK $\alpha$ ( $\lambda$ = 1.54184)                                          |
| 2 $\theta$ range for data collection/°      | 8.422 to 134.052                                                             |
| Index ranges                                | -12 ≤ h ≤ 12, -15 ≤ k ≤ 9, -17 ≤ l ≤ 9                                       |
| Reflections collected                       | 7321                                                                         |
| Independent reflections                     | 3560 [R <sub>int</sub> = 0.0195, R <sub>sigma</sub> = 0.0274]                |
| Data/restraints/parameters                  | 3560/1/277                                                                   |
| Goodness-of-fit on F <sup>2</sup>           | 1.031                                                                        |
| Final R indexes [I ≥ 2 $\sigma$ (I)]        | R <sub>1</sub> = 0.0407, wR <sub>2</sub> = 0.1073                            |
| Final R indexes [all data]                  | R <sub>1</sub> = 0.0479, wR <sub>2</sub> = 0.1139                            |
| Largest diff. peak/hole / e Å <sup>-3</sup> | 0.23/-0.20                                                                   |

---

## Characterization data

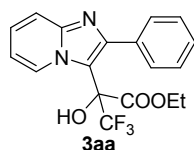

**3,3,3-trifluoro-2-hydroxy-2-(2-phenylimidazo[1,2-a]pyridin-3-yl)-propionic acid ethyl ester (3aa).** White solid, m.p. = 164-165°C. <sup>1</sup>H NMR (600 MHz, DMSO-*d*<sub>6</sub>): δ 8.85 (d, *J* = 6.9 Hz, 1H), 8.67 (s, 1H, -OH), 7.44 – 7.39 (m, 6H), 7.04 (t, *J* = 7.2 Hz, 1H), 3.47 (dq, *J* = 10.8, 7.2 Hz, 1H), 3.15 (dq, *J* = 10.8, 7.2 Hz, 1H), 0.89 (t, *J* = 7.2 Hz, 3H). <sup>13</sup>C NMR (150 MHz, DMSO-*d*<sub>6</sub>): δ 165.4, 147.0, 145.6, 134.6, 130.1, 129.2, 128.7, 128.1, 126.5, 125.0 (q, *J*<sub>C-F</sub> = 285.2 Hz), 117.4, 113.1, 113.0, 76.7 (q, *J*<sub>C-F</sub> = 28.5 Hz), 62.3, 13.6. <sup>19</sup>F NMR (565 MHz, DMSO-*d*<sub>6</sub>): δ -74.5. HRMS (positive ESI): [M+H]<sup>+</sup> calcd for C<sub>18</sub>H<sub>16</sub>F<sub>3</sub>N<sub>2</sub>O<sub>3</sub><sup>+</sup>: 365.1108. Found: 365.1106.

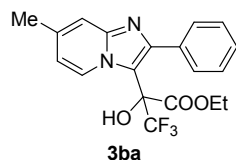

**3,3,3-trifluoro-2-hydroxy-2-(7-methyl-2-phenylimidazo[1,2-a]pyridin-3-yl)-propionic acid ethyl ester (3ba).** White solid, m.p. = 193 – 194°C. <sup>1</sup>H NMR (400 MHz, DMSO-*d*<sub>6</sub>): δ 8.71 (d, *J* = 7.2 Hz, 1H), 8.65 (s, 1H, -OH), 7.43 – 7.36 (m, 6H), 8.78 (s, 5H), 6.89 (dd, *J* = 7.2, 1.6 Hz, 1H), 3.46 (dq, *J* = 7.2, 10.8 Hz, 1H), 3.13 (dq, *J* = 7.2, 10.8 Hz, 1H), 2.39 (s, 3H), 0.88 (t, *J* = 7.2 Hz, 3H). <sup>13</sup>C NMR (100 MHz, DMSO-*d*<sub>6</sub>): δ 164.9, 146.2, 145.5, 136.7, 134.1, 129.6, 128.7, 127.5, 124.5 (q, *J*<sub>C-F</sub> = 285.2 Hz), 115.0, 114.9, 111.9, 76.1 (q, *J*<sub>C-F</sub> = 29.4 Hz), 61.8, 20.5, 13.1. <sup>19</sup>F NMR (376 MHz, DMSO-*d*<sub>6</sub>): δ -74.5. HRMS (positive ESI): [M+H]<sup>+</sup> calcd for C<sub>19</sub>H<sub>18</sub>F<sub>3</sub>N<sub>2</sub>O<sub>3</sub><sup>+</sup>: 379.1264. Found: 379.1263.

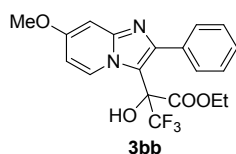

**3,3,3-trifluoro-2-hydroxy-2-(7-methoxy-2-phenylimidazo[1,2-a]pyridin-3-yl)-propionic acid ethyl ester (3bb).** White solid, m.p. = 156 - 158°C. <sup>1</sup>H NMR (400 MHz, DMSO-*d*<sub>6</sub>): δ 8.86 (d, *J* = 7.6 Hz, 1H), 8.64 (s, 1H, -OH), 7.43 – 7.36 (m, 5H), 7.03 (d, *J* = 2.8 Hz, 1H), 6.77 (dd, *J* = 8.0, 2.8 Hz, 1H), 3.87 (s, 3H), 3.46 (dq, *J* = 10.8, 7.2 Hz, 1H), 3.13 (dq, *J* = 10.8, 7.2 Hz, 1H), 0.88 (t, *J* = 7.2 Hz, 3H). <sup>13</sup>C NMR (100 MHz, DMSO-*d*<sub>6</sub>): δ 164.9, 157.9, 146.8, 156.2, 134.2, 129.5,

129.2, 128.1, 127.5, 124.4 (q,  $J_{C-F} = 285.2$  Hz), 111.4, 106.9, 94.4, 75.9 (q,  $J_{C-F} = 29.3$  Hz), 61.8, 55.7, 13.1.  $^{19}\text{F}$  NMR (376 MHz,  $\text{DMSO-}d_6$ ):  $\delta$  -74.6. HRMS (positive ESI):  $[\text{M}+\text{H}]^+$  calcd for  $\text{C}_{19}\text{H}_{18}\text{F}_3\text{N}_2\text{O}_4^+$ : 395.1213. Found: 395.1217.

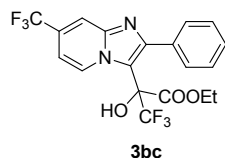

**3,3,3-trifluoro-2-hydroxy-2-(7-(trifluoromethyl)-2-phenylimidazo[1,2-a]pyridin-3-yl)propionic acid ethyl ester (3bc).** White solid, m.p. = 191 - 194 °C.  $^1\text{H}$  NMR (400 MHz,  $\text{DMSO-}d_6$ ):  $\delta$  9.07 (d,  $J = 7.6$  Hz, 1H), 8.96 (s, 1H, -OH), 8.21 (s, 1H), 7.49 - 7.42 (m, 5H), 7.37 (dd,  $J = 7.6, 2.0$  Hz, 1H), 3.50 (dq,  $J = 10.8, 7.2$  Hz, 1H), 3.17 (dq,  $J = 10.8, 7.2$  Hz, 1H), 0.90 (t,  $J = 7.2$  Hz, 3H).  $^{13}\text{C}$  NMR (100 MHz,  $\text{DMSO-}d_6$ ):  $\delta$  164.5, 148.4, 143.2, 133.2, 130.2, 129.6, 128.7, 127.7, 126.0 (q,  $J_{C-F} = 33.4$  Hz), 124.3 (q,  $J_{C-F} = 285.2$  Hz), 123.3 (q,  $J_{C-F} = 270.4$  Hz), 115.1 (q,  $J_{C-F} = 4.8$  Hz), 114.5, 108.0 (q,  $J_{C-F} = 2.5$  Hz), 75.9 (q,  $J_{C-F} = 29.5$  Hz), 62.1, 13.0.  $^{19}\text{F}$  NMR (376 MHz,  $\text{DMSO-}d_6$ ):  $\delta$  -62.3, -74.6. HRMS (positive ESI):  $[\text{M}+\text{H}]^+$  calcd for  $\text{C}_{19}\text{H}_{15}\text{F}_6\text{N}_2\text{O}_3^+$ : 433.0981. Found: 433.0985.

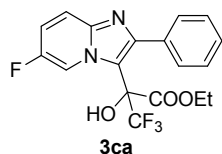

**3,3,3-trifluoro-2-hydroxy-2-(6-fluoro-2-phenylimidazo[1,2-a]pyridin-3-yl)propionic acid ethyl ester (3ca).** White solid, m.p. = 202 - 203 °C.  $^1\text{H}$  NMR (400 MHz,  $\text{DMSO-}d_6$ ):  $\delta$  8.86 (s, 1H, -OH), 8.82 (d,  $J = 3.2$  Hz, 1H), 7.78 (dd,  $J = 10.0, 5.6$  Hz, 1H), 7.59 - 7.54 (m, 1H), 7.46 - 7.40 (m, 5H), 3.48 (dq,  $J = 10.8, 7.2$  Hz, 1H), 3.16 (dq,  $J = 10.8, 7.2$  Hz, 1H), 0.89 (t,  $J = 7.2$  Hz, 3H).  $^{13}\text{C}$  NMR (100 MHz,  $\text{DMSO-}d_6$ ):  $\delta$  164.4, 152.0 (d,  $J_{C-F} = 231.8$  Hz), 147.6, 142.9, 133.6, 129.5, 128.7, 127.7, 124.3 (q,  $J_{C-F} = 285.0$  Hz), 118.0 (d,  $J_{C-F} = 25.7$  Hz), 117.8 (d,  $J_{C-F} = 9.4$  Hz), 115.2 (d,  $J_{C-F} = 41.8$  Hz), 114.1, 75.8 (q,  $J_{C-F} = 29.3$  Hz), 62.0, 13.0.  $^{19}\text{F}$  NMR (376 MHz,  $\text{DMSO-}d_6$ ):  $\delta$  -74.6, -139.6. HRMS (positive ESI):  $[\text{M}+\text{H}]^+$  calcd for  $\text{C}_{18}\text{H}_{15}\text{F}_4\text{N}_2\text{O}_3^+$ : 383.1013. Found: 383.1005.

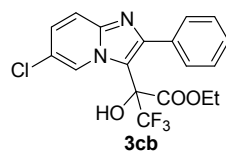

**3,3,3-trifluoro-2-hydroxy-2-(6-chloro-2-phenylimidazo[1,2-a]pyridin-3-yl)propionic acid ethyl ester (3cb).** White solid, m.p. = 210 - 211 °C.  $^1\text{H}$  NMR (400 MHz,  $\text{DMSO-}d_6$ ):  $\delta$  8.92 (s, 1H, -OH), 8.89 (s, 1H), 7.76 (d,  $J = 9.6$  Hz, 1H), 7.53 (dd,  $J = 9.6, 2.0$  Hz, 1H), 7.46 - 7.45 (m, 3H),

7.41 – 7.38 (m, 2H), 3.48 (dq,  $J = 10.8, 7.2$  Hz, 1H), 3.16 (dq,  $J = 10.8, 7.2$  Hz, 1H), 0.89 (t,  $J = 7.2$  Hz, 3H).  $^{13}\text{C}$  NMR (100 MHz, DMSO- $d_6$ ):  $\delta$  164.5, 147.4, 143.5, 133.4, 129.5, 128.5, 127.8, 127.0, 125.9, 124.8 (q,  $J_{\text{C-F}} = 284.9$  Hz), 119.4, 113.4, 75.9 (q,  $J_{\text{C-F}} = 29.5$  Hz), 62.1, 13.0.  $^{19}\text{F}$  NMR (376 MHz, DMSO- $d_6$ ):  $\delta$  -74.6. HRMS (positive ESI):  $[\text{M}+\text{H}]^+$  calcd for  $\text{C}_{18}\text{H}_{16}\text{ClF}_4\text{N}_2\text{O}_3^+$ : 399.0718. Found: 399.0697.

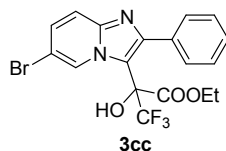

**3,3,3-trifluoro-2-hydroxy-2-(6-bromo-2-phenylimidazo[1,2-a]pyridin-3-yl)propionic acid ethyl ester (3cc).** White solid, m.p. = 214 - 215°C.  $^1\text{H}$  NMR (400 MHz, DMSO- $d_6$ ):  $\delta$  8.97 (s, 1H), 8.92 (s, 1H, -OH), 7.71 (d,  $J = 9.6$  Hz, 1H), 7.60 (dd,  $J = 9.6, 1.6$  Hz, 1H), 7.46 – 7.38 (m, 5H), 3.48 (dq,  $J = 10.8, 7.2$  Hz, 1H), 3.15 (dq,  $J = 10.8, 7.2$  Hz, 1H), 0.89 (t,  $J = 7.2$  Hz, 3H).  $^{13}\text{C}$  NMR (100 MHz, DMSO- $d_6$ ):  $\delta$  164.5, 147.2, 143.5, 133.3, 129.5, 129.0, 128.5, 128.0, 127.7, 124.3 (q,  $J_{\text{C-F}} = 285.5$  Hz) 76.0 (q,  $J_{\text{C-F}} = 29.3$  Hz), 62.1, 13.0.  $^{19}\text{F}$  NMR (376 MHz, DMSO- $d_6$ ):  $\delta$  -74.6. HRMS (positive ESI):  $[\text{M}+\text{H}]^+$  calcd for  $\text{C}_{18}\text{H}_{16}\text{BrF}_3\text{N}_2\text{O}_3^+$ : 433.0213. Found: 433.0210.

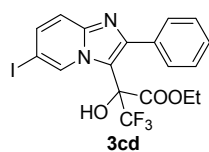

**3,3,3-trifluoro-2-hydroxy-2-(6-iodo-2-phenylimidazo[1,2-a]pyridin-3-yl)propionic acid ethyl ester (3cd).** White solid. M.p. = 210 – 211°C.  $^1\text{H}$  NMR (400 MHz, DMSO- $d_6$ ):  $\delta$  9.06 (s, 1H), 8.87 (s, 1H, -OH), 7.63 (dd,  $J = 9.2, 1.6$  Hz, 1H), 7.55 (d,  $J = 9.2$  Hz, 1H), 7.45 – 7.37 (m, 5H), 3.48 (dq,  $J = 10.8, 7.2$  Hz, 1H), 3.14 (dq,  $J = 10.8, 7.2$  Hz, 1H), 0.88 (t,  $J = 7.2$  Hz, 3H).  $^{13}\text{C}$  NMR (100 MHz, DMSO- $d_6$ ):  $\delta$  164.5, 146.7, 143.6, 133.5, 133.4, 132.7, 129.6, 128.5, 127.7, 124.4 (q,  $J_{\text{C-F}} = 284.7$  Hz), 118.4, 112.7, 112.6, 75.9 (q,  $J_{\text{C-F}} = 29.4$  Hz), 62.0, 13.0.  $^{19}\text{F}$  NMR (376 MHz, DMSO- $d_6$ ):  $\delta$  -74.6. HRMS (positive ESI):  $[\text{M}+\text{H}]^+$  calcd for  $\text{C}_{18}\text{H}_{16}\text{IF}_3\text{N}_2\text{O}_3^+$ : 491.0074. Found: 491.0068.

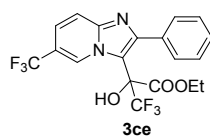

**3,3,3-trifluoro-2-hydroxy-2-(6-(trifluoromethyl)-2-phenylimidazo[1,2-a]pyridin-3-yl)propionic acid ethyl ester (3ce).** White solid, m.p. = 173 - 174°C.  $^1\text{H}$  NMR (400 MHz, DMSO-

*d*<sub>6</sub>):  $\delta$  9.26 (s, 1H), 9.06 (s, 1H, -OH), 7.93 (d,  $J$  = 9.6 Hz, 1H), 7.72 (dd,  $J$  = 9.6, 1.6 Hz, 1H), 7.49 – 7.41 (m, 5H), 3.51 (dq,  $J$  = 10.8, 7.2 Hz, 1H), 3.18 (dq,  $J$  = 10.8, 7.2 Hz, 1H), 0.90 (t,  $J$  = 7.2 Hz, 3H). <sup>13</sup>C NMR (100 MHz, DMSO-*d*<sub>6</sub>):  $\delta$  164.3, 148.3, 144.9, 133.0, 129.5, 128.8, 127.8, 127.4, 124.3 (q,  $J_{C-F}$  = 285.2 Hz), 123.6 (q,  $J_{C-F}$  = 269.4 Hz), 121.6 (q,  $J_{C-F}$  = 2.3 Hz), 118.4, 115.1 (q,  $J_{C-F}$  = 33.1 Hz), 114.2, 75.9 (q,  $J_{C-F}$  = 29.2 Hz), 62.2, 13.0. <sup>19</sup>F NMR (376 MHz, DMSO-*d*<sub>6</sub>):  $\delta$  -61.0, -74.8. HRMS (positive ESI): [M+H]<sup>+</sup> calcd for C<sub>19</sub>H<sub>15</sub>F<sub>6</sub>N<sub>2</sub>O<sub>3</sub><sup>+</sup>: 433.0981. Found: 433.0985.

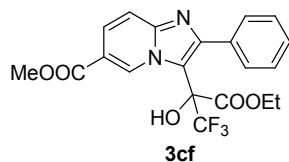

**3,3,3-trifluoro-2-hydroxy-2-(6-(methyl-carboxy)-2-**

**phenylimidazo[1,2-a]pyridin-3-yl)-propionic acid ethyl ester (3cf).** White solid, m.p. = 231 – 232 °C. <sup>1</sup>H NMR (400 MHz, DMSO-*d*<sub>6</sub>):  $\delta$  9.57 (s, 1H), 8.87 (s, 1H, -OH), 7.84 (dd,  $J$  = 9.6, 1.6 Hz, 1H), 7.76 (d,  $J$  = 9.6 Hz, 1H), 7.48 – 7.41 (m, 5H), 3.94 (s, 3H), 3.50 (dq,  $J$  = 10.8, 7.2 Hz, 1H), 3.17 (dq,  $J$  = 10.8, 7.2 Hz, 1H), 0.89 (t,  $J$  = 7.2 Hz, 3H). <sup>13</sup>C NMR (100 MHz, DMSO-*d*<sub>6</sub>):  $\delta$  165.9, 164.8, 145.3, 145.2, 138.8, 130.0, 129.3, 128.7, 128.4, 126.4, 124.4 (q,  $J_{C-F}$  = 284.9 Hz), 117.0, 113.0, 112.8, 76.1 (q,  $J_{C-F}$  = 29.3 Hz), 62.0, 52.3, 13.0. <sup>19</sup>F NMR (376 MHz, DMSO-*d*<sub>6</sub>):  $\delta$  -74.5. HRMS (positive ESI): [M+H]<sup>+</sup> calcd for C<sub>20</sub>H<sub>18</sub>F<sub>3</sub>N<sub>2</sub>O<sub>5</sub><sup>+</sup>: 423.1162. Found: 423.1165.

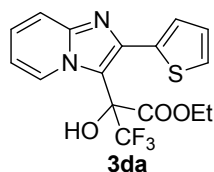

**3,3,3-trifluoro-2-hydroxy-2-(2-(thiophen-2-yl)imidazo[1,2-a]pyridin-3-yl)-propionic acid ethyl ester (3da).** White solid. M.p. = 198 - 199 °C. <sup>1</sup>H NMR (400 MHz, DMSO-*d*<sub>6</sub>):  $\delta$  8.89 (s, 1H, -OH), 8.84 (d,  $J$  = 7.2 Hz, 1H), 7.70 (d,  $J$  = 5.2 Hz, 1H), 7.68 (d,  $J$  = 9.2 Hz, 1H), 7.43 (dd,  $J$  = 8.4, 7.2 Hz, 1H), 7.13 – 7.03 (m, 3H), 3.78 (dq,  $J$  = 10.8, 7.2 Hz, 1H), 3.48 (dq,  $J$  = 10.8, 7.2 Hz, 1H), 0.93 (t,  $J$  = 7.2 Hz, 3H). <sup>13</sup>C NMR (100 MHz, DMSO-*d*<sub>6</sub>):  $\delta$  164.8, 145.1, 136.9, 135.6, 128.6, 128.3, 127.4, 127.0, 126.4, 124.5 (q,  $J_{C-F}$  = 284.6 Hz), 116.8, 112.8, 112.5, 76.2 (q,  $J_{C-F}$  = 29.5 Hz), 62.2, 13.2. <sup>19</sup>F NMR (376 MHz, DMSO-*d*<sub>6</sub>):  $\delta$  -75.4. HRMS (positive ESI): [M+H]<sup>+</sup> calcd for C<sub>16</sub>H<sub>14</sub>F<sub>3</sub>N<sub>2</sub>O<sub>3</sub>S<sup>+</sup>: 371.0672. Found: 371.0671.

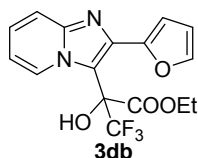

**3,3,3-trifluoro-2-hydroxy-2-(2-(furan-2-yl)imidazo[1,2-a]pyridin-3-yl)propionic acid ethyl ester (3db).** White solid. M.p. = 196 – 197°C. <sup>1</sup>H NMR (400 MHz, DMSO-*d*<sub>6</sub>): δ 8.92 (s, 1H, -OH), 8.89 (d, *J* = 7.2 Hz, 1H), 7.76 (d, *J* = 1.2 Hz, 1H), 7.65 (d, *J* = 9.2 Hz, 1H), 7.41 (ddd, *J* = 9.2, 6.8, 1.2 Hz, 1H), 7.02 (dt, *J* = 7.2, 1.2 Hz, 1H), 6.74 (d, *J* = 3.2 Hz, 1H), 6.62 (dd, *J* = 3.2, 2.0 Hz, 1H), 3.95 (dq, *J* = 10.8, 7.2 Hz, 1H), 3.85 (dq, *J* = 10.8, 7.2 Hz, 1H), 0.97 (t, *J* = 7.2 Hz, 3H). <sup>13</sup>C NMR (100 MHz, DMSO-*d*<sub>6</sub>): δ 165.0, 147.9, 145.4, 143.6, 136.4, 128.8, 126.4, 124.3 (q, *J*<sub>C-F</sub> = 285.2 Hz), 116.8, 112.70, 112.68, 111.5, 110.1, 76.4 (q, *J*<sub>C-F</sub> = 30.0 Hz), 62.0, 13.2. <sup>19</sup>F NMR (376 MHz, DMSO-*d*<sub>6</sub>): δ -75.8. HRMS (positive ESI): [M+H]<sup>+</sup> calcd for C<sub>16</sub>H<sub>14</sub>F<sub>3</sub>N<sub>2</sub>O<sub>4</sub><sup>+</sup>: 355.0900. Found: 355.0894.

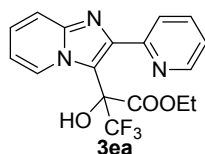

**3,3,3-trifluoro-2-hydroxy-2-(2-(pyridine-2-yl)imidazo[1,2-a]pyridin-3-yl)propionic acid ethyl ester (3ea).** White solid. M.p. = 183 - 184°C. <sup>1</sup>H NMR (400 MHz, CDCl<sub>3</sub>): δ 14.02 (brs, 1H), 8.66 (d, *J* = 8.0 Hz, 1H), 8.53 (dd, *J* = 4.8, 0.8 Hz, 1H), 8.06 (d, *J* = 7.2 Hz, 1H), 7.95 (td, *J* = 7.6, 1.6 Hz, 1H), 7.70 (d, *J* = 5.2 Hz, 1H), 7.37 – 7.30 (m, 2H), 6.87 (dt, *J* = 7.2, 1.2 Hz, 1H), 4.40 – 4.28 (m, 2H), 1.97 (t, *J* = 7.2 Hz, 3H). <sup>13</sup>C NMR (100 MHz, CDCl<sub>3</sub>): δ 167.4, 151.5, 145.6, 145.4, 143.8, 139.0, 125.9, 125.2, 125.1, 124.4 (q, *J*<sub>C-F</sub> = 286.2 Hz), 124.3, 123.3, 118.9, 118.3, 113.7, 76.5 (q, *J*<sub>C-F</sub> = 30.2 Hz), 64.0, 13.9. <sup>19</sup>F NMR (376 MHz, CDCl<sub>3</sub>): δ -77.8. HRMS (positive ESI): [M+H]<sup>+</sup> calcd for C<sub>17</sub>H<sub>15</sub>F<sub>3</sub>N<sub>3</sub>O<sub>3</sub><sup>+</sup>: 366.1060. Found: 366.1058.

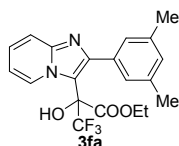

**3,3,3-trifluoro-2-hydroxy-2-(2-(3,5-dimethylphenyl)imidazo[1,2-a]pyridin-3-yl)propionic acid ethyl ester (3fa).** White solid, m.p. = 181 - 182°C. <sup>1</sup>H NMR (400 MHz, DMSO-*d*<sub>6</sub>): δ 8.83 (d, *J* = 6.8 Hz, 1H), 8.66 (s, 1H, -OH), 7.65 (d, *J* = 9.2 Hz, 1H), 7.41 (dt, *J* = 8.0, 0.8 Hz, 1H), 7.06 – 6.99 (m, 4H), 3.51 (dq, *J* = 10.8, 7.2 Hz, 1H), 3.10 (dq, *J* = 10.8, 7.2 Hz, 1H), 2.03 (s, 6H), 0.88



(t,  $J = 7.2$  Hz, 3H).  $^{13}\text{C}$  NMR (100 MHz,  $\text{DMSO-}d_6$ ):  $\delta$  164.8, 146.7, 145.0, 136.5, 133.8, 129.4, 128.7, 127.3, 126.0, 124.5 (q,  $J_{\text{C-F}} = 282.6$  Hz), 116.8, 112.4, 76.1 (q,  $J_{\text{C-F}} = 28.7$  Hz), 61.9, 20.8, 13.0.  $^{19}\text{F}$  NMR (376 MHz,  $\text{DMSO-}d_6$ ):  $\delta$  -74.5. HRMS (positive ESI):  $[\text{M}+\text{H}]^+$  calcd for  $\text{C}_{20}\text{H}_{20}\text{F}_3\text{N}_2\text{O}_3^+$ : 393.1421. Found: 393.1419.

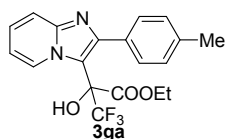

**3,3,3-trifluoro-2-hydroxy-2-(2-(4-methylphenyl)imidazo[1,2-a]pyridin-3-yl)propionic acid ethyl ester (3ga).** Whilt solid, m.p. = 165 - 166°C.  $^1\text{H}$  NMR (400 MHz,  $\text{DMSO-}d_6$ ):  $\delta$  8.83 (d,  $J = 7.2$  Hz, 1H), 8.67 (s, 1H, -OH), 7.41 (ddd,  $J = 8.8, 6.8, 0.8$  Hz, 1H), 7.26 (q,  $J = 8.0$  Hz, 3H), 7.03 (dt,  $J = 7.2, 1.2$  Hz, 1H), 3.50 (dq,  $J = 10.8, 7.2$  Hz, 1H), 3.17 (dq,  $J = 10.8, 7.2$  Hz, 1H), 2.36 (s, 3H), 0.90 (t,  $J = 7.2$  Hz, 3H).  $^{13}\text{C}$  NMR (100 MHz,  $\text{DMSO-}d_6$ ):  $\delta$  146.9, 146.5, 145.0, 137.6, 131.1, 129.5, 128.6, 128.1, 126.0, 124.5 (q,  $J_{\text{C-F}} = 285.6$  Hz), 116.8, 112.4, 76.2 ((q,  $J_{\text{C-F}} = 29.2$  Hz), 61.9, 20.8, 13.1.  $^{19}\text{F}$  NMR (400MHz,  $\text{DMSO-}d_6$ ):  $\delta$  -74.5. HRMS (positive ESI):  $[\text{M}+\text{H}]^+$  calcd for  $\text{C}_{19}\text{H}_{18}\text{F}_3\text{N}_2\text{O}_3^+$ : 379.1264. Found: 379.1259.

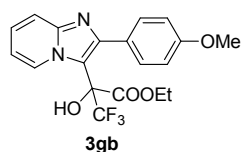

**3,3,3-trifluoro-2-hydroxy-2-(2-(4-methoxyphenyl)imidazo[1,2-a]pyridin-3-yl)propionic acid ethyl ester (3gb).** Whilt solid, m.p. = 188 - 189°C.  $^1\text{H}$  NMR (400 MHz,  $\text{DMSO-}d_6$ ):  $\delta$  8.83 (d,  $J = 7.2$  Hz, 1H), 8.67 (s, 1H, -OH), 7.40 (t,  $J = 8.0$  Hz, 1H), 7.32 (d,  $J = 8.8$  Hz, 2H), 7.03 (dd,  $J = 7.2, 0.8$  Hz, 1H), 7.00 (d,  $J = 8.8$  Hz, 2H), 3.80 (dq,  $J = 10.8, 7.2$  Hz, 1H), 3.25 (dq,  $J = 10.8, 7.2$  Hz, 1H), 0.92 (t,  $J = 7.2$  Hz, 3H).  $^{13}\text{C}$  NMR (100 MHz,  $\text{DMSO-}d_6$ ):  $\delta$  165.0, 159.3, 146.3, 145.0, 130.9, 128.6, 126.2, 125.9, 124.5 (q,  $J_{\text{C-F}} = 284.6$  Hz), 116.8, 113.0, 112.34, 112.30, 76.2 (q,  $J_{\text{C-F}} = 29.3$  Hz), 62.0, 55.2, 13.1.  $^{19}\text{F}$  NMR (376 MHz,  $\text{DMSO-}d_6$ ):  $\delta$  -74.6. HRMS (positive ESI):  $[\text{M}+\text{H}]^+$  calcd for  $\text{C}_{19}\text{H}_{18}\text{F}_3\text{N}_2\text{O}_4^+$ : 395.1213. Found: 395.1208.

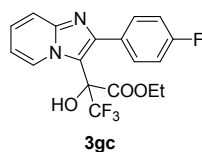

**3,3,3-trifluoro-2-hydroxy-2-(2-(4-fluorophenyl)imidazo[1,2-a]pyridin-3-yl)propionic acid ethyl ester (3gc).** White solid, m.p. = 175 - 176°C.  $^1\text{H}$  NMR (400 MHz,  $\text{DMSO-}d_6$ ):  $\delta$  8.84 (d,  $J =$

7.2 Hz, 1H), 8.87 (s, 1H, *-OH*), 7.76 (d,  $J = 9.2$  Hz, 1H), 7.45 -7.41 (m, 3H), 7.28 (t,  $J = 8.8$  Hz, 2H), 7.06 (t,  $J = 6.8$  Hz, 1H), 3.58 (dq,  $J = 10.8, 7.2$  Hz, 1H), 3.27 (dq,  $J = 10.8, 7.2$  Hz, 1H), 0.94 (t,  $J = 7.2$  Hz, 3H).  $^{13}\text{C}$  NMR (100 MHz, DMSO- $d_6$ ):  $\delta$  164.9, 162.1 (d,  $J_{\text{C-F}} = 243.7$  Hz), 145.4, 145.0, 131.8 (d,  $J_{\text{C-F}} = 3.0$  Hz), 128.6, 126.2, 124.4 (q,  $J_{\text{C-F}} = 285.1$  Hz), 116.9, 114.5 (d,  $J_{\text{C-F}} = 81.3$  Hz), 112.6, 76.1 (d,  $J_{\text{C-F}} = 29.1$  Hz), 62.0, 13.1.  $^{19}\text{F}$  NMR (376 MHz, DMSO- $d_6$ ):  $\delta$  -74.6, -113.4. HRMS (positive ESI):  $[\text{M}+\text{H}]^+$  calcd for  $\text{C}_{18}\text{H}_{15}\text{F}_4\text{N}_2\text{O}_3^+$ : 383.1013. Found: 383.1007.

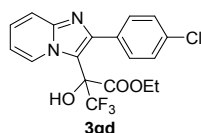

**3,3,3-trifluoro-2-hydroxy-2-(2-(4-chlorophenyl)imidazo[1,2-a]pyridin-3-yl)-propionic**

**acid ethyl ester (3gd).** White solid, m.p. = 187 – 188 °C.  $^1\text{H}$  NMR (400 MHz, DMSO- $d_6$ ):  $\delta$  8.84 (d,  $J = 7.2$  Hz, 1H), 8.77 (s, 1H, *-OH*), 7.68 (d,  $J = 9.2$  Hz, 1H), 7.52 (d,  $J = 0.84$  Hz, 2H), 7.45 (dd,  $J = 6.8, 0.8$  Hz, 1H), 7.41 (d,  $J = 0.84$  Hz, 2H), 7.06 (dt,  $J = 7.2, 1.2$  Hz, 1H), 3.59 (dq,  $J = 10.8, 7.2$  Hz, 1H), 3.28 (dq,  $J = 10.8, 7.2$  Hz, 1H), 0.94 (t,  $J = 7.2$  Hz, 3H).  $^{13}\text{C}$  NMR (100 MHz, DMSO- $d_6$ ):  $\delta$  164.9, 145.2, 145.1, 133.3, 132.8, 131.4, 128.6, 127.7, 126.3, 124.4 (q,  $J_{\text{C-F}} = 285.3$  Hz), 116.9, 112.7, 76.1 (q,  $J_{\text{C-F}} = 29.3$  Hz), 62.1, 13.1.  $^{19}\text{F}$  NMR (376 MHz, DMSO- $d_6$ ):  $\delta$  -74.6. HRMS (positive ESI):  $[\text{M}+\text{H}]^+$  calcd for  $\text{C}_{18}\text{H}_{15}\text{F}_3\text{N}_2\text{O}_3\text{Cl}^+$ : 399.0718. Found: 399.0714.

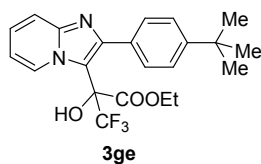

**3,3,3-trifluoro-2-hydroxy-2-(2-(4-(*tert*-butyl)phenyl)imidazo[1,2-**

**a]pyridin-3-yl)-propionic acid ethyl ester (3ge).** White solid, m.p. = 214 - 215 °C.  $^1\text{H}$  NMR (400 MHz, DMSO- $d_6$ ):  $\delta$  8.84 (d,  $J = 6.8$  Hz, 1H), 8.67 (s, 1H, *-OH*), 7.66 (d,  $J = 8.8$  Hz, 1H), 7.46 – 7.39 (m, 3H), 7.32 (d,  $J = 8.4$  Hz, 2H), 7.03 (dt,  $J = 7.2, 1.2$  Hz, 1H), 3.37 (dq,  $J = 10.8, 7.2$  Hz, 1H), 3.20 (dq,  $J = 10.8, 7.2$  Hz, 1H), 1.32 (s, 9H), 0.84 (t,  $J = 7.2$  Hz, 3H).  $^{13}\text{C}$  NMR (100 MHz, DMSO- $d_6$ ):  $\delta$  165.0, 150.7, 146.5, 145.1, 131.2, 129.3, 128.7, 128.6, 126.0, 124.5 (q,  $J_{\text{C-F}} = 284.9$  Hz), 124.3, 116.8, 112.4, 76.2 (q,  $J_{\text{C-F}} = 29.3$  Hz), 61.9, 34.3, 30.0, 13.0.  $^{19}\text{F}$  NMR (376 MHz, DMSO- $d_6$ ):  $\delta$  -74.4. HRMS (positive ESI):  $[\text{M}+\text{H}]^+$  calcd for  $\text{C}_{22}\text{H}_{24}\text{F}_3\text{N}_2\text{O}_3^+$ : 421.1734. Found: 421.1733.

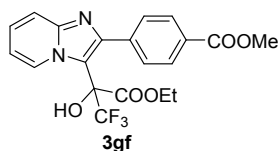

**3,3,3-trifluoro-2-hydroxy-2-(2-(4-(methyl-carboxy)phenyl)imidazo[1,2-a]pyridin-3-yl)-propionic acid ethyl ester (3gf).** White solid, m.p. = 209 - 210°C. <sup>1</sup>H NMR (400 MHz, DMSO-*d*<sub>6</sub>): δ 8.85 (d, *J* = 7.2 Hz, 1H), 8.80 (s, 1H, -OH), 7.70 (d, *J* = 9.2 Hz, 1H), 7.56 (d, *J* = 8.4 Hz, 2H), 7.46 (t, *J* = 8.0 Hz, 1H), 7.08 (dt, *J* = 6.8, 0.8 Hz, 1H), 3.90 (s, 3H), 3.52 (dq, *J* = 10.8, 7.2 Hz, 1H), 3.15 (dq, *J* = 10.8, 7.2 Hz, 1H), 0.89 (t, *J* = 7.2 Hz, 3H). <sup>13</sup>C NMR (100 MHz, DMSO-*d*<sub>6</sub>): δ 164.7, 164.5, 148.2, 145.5, 133.2, 132.4, 129.5, 128.7, 127.7, 125.0, 124.3 (q, *J*<sub>C-F</sub> = 285.0 Hz), 116.8, 115.7, 113.8, 75.9 (q, *J*<sub>C-F</sub> = 29.3 Hz), 62.1, 52.9, 13.0. <sup>19</sup>F NMR (376 MHz, DMSO-*d*<sub>6</sub>): δ -74.6. HRMS (positive ESI): [M+H]<sup>+</sup> calcd for C<sub>20</sub>H<sub>18</sub>F<sub>3</sub>N<sub>2</sub>O<sub>5</sub><sup>+</sup>: 423.1162. Found: 423.1164.

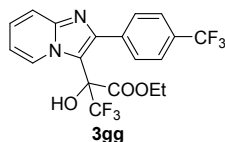

**3,3,3-trifluoro-2-hydroxy-2-(2-(4-(trifluoromethyl)phenyl)imidazo[1,2-a]pyridin-3-yl)-propionic acid ethyl ester (3gg).** White solid, m.p. = 197 - 198°C. <sup>1</sup>H NMR (400 MHz, DMSO-*d*<sub>6</sub>): δ 8.85 (d, *J* = 7.2 Hz, 1H), 8.82 (s, 1H, -OH), 7.83 (d, *J* = 8.0 Hz, 2H), 7.71 (d, *J* = 9.2 Hz, 1H), 7.62 (d, *J* = 8.0 Hz, 2H), 7.46 (ddd, *J* = 8.8, 6.8, 1.2 Hz, 1H), 7.09 (dt, *J* = 7.2, 1.2 Hz, 1H), 3.51 (dq, *J* = 10.8, 7.2 Hz, 1H), 3.42 (dq, *J* = 10.8, 7.2 Hz, 1H), 0.89 (t, *J* = 7.2 Hz, 3H). <sup>13</sup>C NMR (100 MHz, DMSO-*d*<sub>6</sub>): δ 164.9, 154.2, 144.9, 138.2, 130.5, 128.8 (q, *J*<sub>C-F</sub> = 32.9 Hz), 128.6, 126.5, 124.5 (q, *J*<sub>C-F</sub> = 3.7 Hz), 124.3 (q, *J*<sub>C-F</sub> = 285.2 Hz), 124.2 (q, *J*<sub>C-F</sub> = 270.6 Hz), 117.1, 113.0 (q, *J*<sub>C-F</sub> = 9.0 Hz), 112.9, 76.1 (q, *J*<sub>C-F</sub> = 29.3 Hz), 62.1, 13.0. <sup>19</sup>F NMR (376 MHz, DMSO-*d*<sub>6</sub>): δ -61.1, -74.6. HRMS (positive ESI): [M+H]<sup>+</sup> calcd for C<sub>19</sub>H<sub>15</sub>F<sub>6</sub>N<sub>2</sub>O<sub>3</sub><sup>+</sup>: 433.0981. Found: 433.0984.

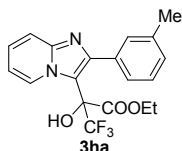

**3,3,3-trifluoro-2-hydroxy-2-(2-(3-methylphenyl)imidazo[1,2-a]pyridin-3-yl)-propionic acid ethyl ester (3ha).** White solid, m.p. = 171 - 172°C. <sup>1</sup>H NMR (400 MHz, DMSO-*d*<sub>6</sub>): δ 8.85 (d, *J* = 6.8 Hz, 1H), 8.69 (s, 1H, -OH), 7.66 (d, *J* = 9.2 Hz, 1H), 7.41 (ddd, *J* = 8.8, 6.8, 1.2 Hz, 1H), 7.31 (t, *J* = 7.6 Hz, 1H), 7.25 - 7.18 (m, 3H), 7.34 (dt, *J* = 7.2, 1.2 Hz, 1H), 3.50 (dq, *J* = 10.8, 7.2 Hz, 1H), 3.12 (dq, *J* = 10.8, 7.2 Hz, 1H), 2.35 (s, 3H), 0.89 (t, *J* = 7.2 Hz, 3H). <sup>13</sup>C NMR (100 MHz,

DMSO-*d*<sub>6</sub>):  $\delta$  164.8, 146.6, 145.0, 136.7, 133.9, 130.3, 128.7, 127.5, 126.7, 124.5 (q,  $J_{C-F}$  = 285.2 Hz, 116.9, 112.4, 76.1 (q,  $J_{C-F}$  = 29.3 Hz), 61.9, 20.9, 13.0. <sup>19</sup>F NMR (376MHz, DMSO-*d*<sub>6</sub>):  $\delta$  -74.5. HRMS (positive ESI): [M+H]<sup>+</sup> calcd for C<sub>19</sub>H<sub>18</sub>F<sub>3</sub>N<sub>2</sub>O<sub>3</sub><sup>+</sup>: 379.1264. Found: 379.1265.

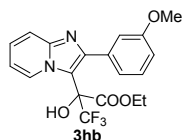

**3,3,3-trifluoro-2-hydroxy-2-(2-(3-methoxyphenyl)imidazo[1,2-a]pyridin-3-yl)propionic acid ethyl ester (3hb).** White solid, m.p. = 177 - 178 °C. <sup>1</sup>H NMR(400 MHz, DMSO-*d*<sub>6</sub>):  $\delta$  8.85 (d,  $J$  = 6.8 Hz, 1H), 8.72 (s, 1H, -OH), 7.67 (d,  $J$  = 9.2 Hz, 1H), 7.44 – 7.40 (m, 1H), 7.35 (t,  $J$  = 8.0 Hz, 1H), 7.04 (dt,  $J$  = 6.8, 1.2 Hz, 1H), 7.00 (dd,  $J$  = 8.0, 2.4 Hz, 2H), 6.93 (s, 1H), 3.79 (s, 3H), 3.54 (dq,  $J$  = 10.8, 7.2 Hz, 1H), 3.19 (dq,  $J$  = 10.8, 7.2 Hz, 1H), 0.90 (t,  $J$  = 7.2 Hz, 3H). <sup>13</sup>C NMR (100 MHz, DMSO-*d*<sub>6</sub>):  $\delta$  164.9, 158.4, 146.3, 145.1, 135.2, 128.8, 128.7, 126.1, 124.5 (q,  $J_{C-F}$  = 285.6 Hz), 121.9, 116.9, 114.9, 114.0, 112.5, 76.2 (q,  $J_{C-F}$  = 29.3 Hz), 61.9, 54.9, 13.0. <sup>19</sup>F NMR (376 MHz, DMSO-*d*<sub>6</sub>):  $\delta$  -74.5. HRMS (positive ESI): [M+H]<sup>+</sup> calcd for C<sub>19</sub>H<sub>18</sub>F<sub>3</sub>N<sub>2</sub>O<sub>4</sub><sup>+</sup>: 395.1213. Found: 395.1214.

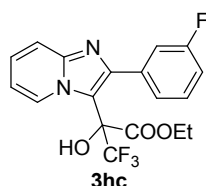

**3,3,3-trifluoro-2-hydroxy-2-(2-(3-fluorophenyl)imidazo[1,2-a]pyridin-3-yl)propionic acid ethyl ester (3hc).** White solid, m.p. = 179 - 180 °C. <sup>1</sup>H NMR (400 MHz, DMSO-*d*<sub>6</sub>):  $\delta$  8.84 (d,  $J$  = 7.2 Hz, 1H), 8.80 (s, 1H, -OH), 7.69 (d,  $J$  = 9.2 Hz, 1H), 7.53 – 7.43 (m, 2H), 7.30 (dt,  $J$  = 8.4, 2.4 Hz, 1H), 7.25 (d,  $J$  = 7.6 Hz, 1H), 7.17 (d,  $J$  = 10.0 Hz, 1H), 7.07 (dt,  $J$  = 7.2, 1.0 Hz, 1H), 3.58 (dq,  $J$  = 10.8, 7.2 Hz, 1H), 3.27 (dq,  $J$  = 10.8, 7.2 Hz, 1H), 0.93 (t,  $J$  = 7.2 Hz, 3H). <sup>13</sup>C NMR (100 MHz, DMSO-*d*<sub>6</sub>):  $\delta$  164.9, 161.3 (d,  $J_{C-F}$  = 242.1 Hz), 145.1, 145.0, 136.2 (d,  $J_{C-F}$  = 8.0 Hz), 129.7 (d,  $J_{C-F}$  = 8.3 Hz), 128.7, 126.4, 125.8, 124.4 (q,  $J_{C-F}$  = 285.2 Hz), 116.3 (d,  $J_{C-F}$  = 21.7 Hz), 115.2 (d,  $J_{C-F}$  = 20.5 Hz), 112.8, 112.7, 76.1 (q,  $J_{C-F}$  = 29.4 Hz), 62.1, 13.0. <sup>19</sup>F NMR (376 MHz, DMSO-*d*<sub>6</sub>):  $\delta$  -74.6, -113.7. HRMS (positive ESI): [M+H]<sup>+</sup> calcd for C<sub>18</sub>H<sub>15</sub>F<sub>4</sub>N<sub>2</sub>O<sub>3</sub><sup>+</sup>: 383.1013. Found: 383.1011.

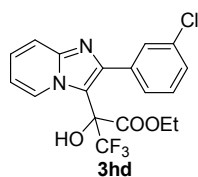

**3,3,3-trifluoro-2-hydroxy-2-(2-(3-chlorophenyl)imidazo[1,2-a]pyridin-3-yl)propionic acid ethyl ester (3hd).** White solid, m.p. = 159 - 160°C. <sup>1</sup>H NMR(400 MHz, DMSO-*d*<sub>6</sub>): δ 8.84 (d, *J* = 7.2 Hz, 1H), 8.81 (s, 1H, -OH), 7.69 (d, *J* = 9.2 Hz, 1H), 7.54 – 7.43 (m, 3H), 7.40 – 7.36 (m, 2H), 7.08 (dt, *J* = 7.2, 1.2 Hz, 1H), 3.58 (dq, *J* = 10.8, 7.2 Hz, 1H), 3.28 (dq, *J* = 10.8, 7.2 Hz, 1H), 0.94 (t, *J* = 7.2 Hz, 3H). <sup>13</sup>C NMR (100 MHz, DMSO-*d*<sub>6</sub>): δ 164.8, 145.1, 144.8, 136.0, 132.4, 129.6, 128.7, 128.3, 128.2, 126.4, 124.4 (q, *J*<sub>C-F</sub> = 284.9 Hz), 117.0, 112.8, 76.1 (q, *J*<sub>C-F</sub> = 29.5 Hz), 62.1, 13.0. <sup>19</sup>F NMR (376 MHz, DMSO-*d*<sub>6</sub>): δ -74.6. HRMS (positive ESI): [M+H]<sup>+</sup> calcd for C<sub>18</sub>H<sub>15</sub>ClF<sub>3</sub>N<sub>2</sub>O<sub>3</sub><sup>+</sup>: 399.0718. Found: 399.0719.

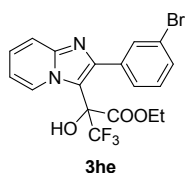

**3,3,3-trifluoro-2-hydroxy-2-(2-(3-bromophenyl)imidazo[1,2-a]pyridin-3-yl)propionic acid ethyl ester (3hd).** White solid, m.p. = 150 - 151°C. <sup>1</sup>H NMR (400 MHz, DMSO-*d*<sub>6</sub>): δ 8.54 (d, *J* = 7.2 Hz, 1H), 8.80 (s, 1H, -OH), 7.70 – 7.65 (m, 2H), 7.54 (s, 1H), 7.47 – 7.40 (m, 3H), 7.07 (dt, *J* = 7.2, 1.2 Hz, 1H), 3.59 (dq, *J* = 10.8, 7.2 Hz, 1H), 3.29 (dq, *J* = 10.8, 7.2 Hz, 1H), 0.95 (t, *J* = 7.2 Hz, 3H). <sup>13</sup>C NMR (100 MHz, DMSO-*d*<sub>6</sub>): δ 164.8, 145.1, 144.8, 136.3, 132.1, 131.1, 129.9, 128.7, 126.4, 124.4 (q, *J*<sub>C-F</sub> = 285.1 Hz), 120.9, 117.0, 112.8, 76.1 (q, *J*<sub>C-F</sub> = 29.4 Hz), 62.2, 13.1. <sup>19</sup>F NMR (376 MHz, DMSO-*d*<sub>6</sub>): δ -74.6. HRMS (positive ESI): [M+H]<sup>+</sup> calcd for C<sub>18</sub>H<sub>15</sub>BrF<sub>3</sub>N<sub>2</sub>O<sub>3</sub><sup>+</sup>: 443.0213. Found: 443.0211.

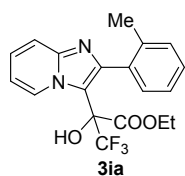

**3,3,3-trifluoro-2-hydroxy-2-(2-(2-methylphenyl)imidazo[1,2-a]pyridin-3-yl)propionic acid ethyl ester (3ia).** White solid, m.p. = 213 - 214°C. <sup>1</sup>H NMR (400 MHz, DMSO-*d*<sub>6</sub>): δ 8.86 (d, *J* = 7.2 Hz, 1H), 8.57 (s, 1H, -OH), 7.40 (ddd, *J* = 8.8, 5.6, 1.2 Hz, 1H), 7.34 – 7.28 (m, 2H), 7.20 (dt, *J* = 7.2, 1.6 Hz, 1H), 7.10 (brs, 1H), 7.03 (dt, *J* = 6.8, 1.2 Hz, 1H), 3.21 (s, 2H), 2.07 (s, 3H), 0.97 (t, *J* =

7.2 Hz, 3H).  $^{13}\text{H}$  NMR (100 MHz,  $\text{DMSO-}d_6$ ):  $\delta$  165.0, 145.6, 145.0, 137.7, 130.6, 129.4, 128.5, 126.0, 124.6, 124.3 (q, q,  $J_{\text{C-F}} = 285.8$  Hz), 116.8, 112.9, 112.4, 76.0 (q, q,  $J_{\text{C-F}} = 29.8$  Hz), 61.9, 13.1.  $^{19}\text{F}$  NMR (376 MHz,  $\text{DMSO-}d_6$ ):  $\delta$  -72.8, -74.1. HRMS (positive ESI):  $[\text{M}+\text{H}]^+$  calcd for  $\text{C}_{19}\text{H}_{18}\text{F}_3\text{N}_2\text{O}_3^+$ : 379.1264. Found: 379.1260.

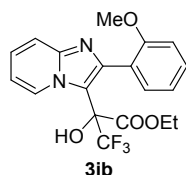

**3,3,3-trifluoro-2-hydroxy-2-(2-(2-methoxyphenyl)imidazo[1,2-a]pyridin-3-yl)propionic acid ethyl ester (3ib).** White solid, m.p. = 202 - 203 °C.  $^1\text{H}$  NMR (400 MHz,  $\text{DMSO-}d_6$ ):  $\delta$  8.83 (d,  $J = 7.2$  Hz, 1H), 8.55 (s, 1H, -OH), 7.60 (d,  $J = 9.2$  Hz, 1H), 7.43 - 7.36 (m, 2H), 7.06 (d,  $J = 8.4$  Hz, 2H), 7.01 (dt,  $J = 7.2, 1.2$  Hz, 1H), 6.96 (t,  $J = 7.2$  Hz, 1H), 3.66 (s, 3H), 3.35 (s, 2H), 0.99 (t,  $J = 7.2$  Hz, 3H).  $^{13}\text{H}$  NMR (100 MHz,  $\text{DMSO-}d_6$ ):  $\delta$  165.0, 157.7, 144.8, 143.3, 131.9, 130.1, 128.4, 125.7, 124.3 (q,  $J_{\text{C-F}} = 285.6$  Hz), 122.2, 119.1, 116.8, 113.3, 112.1, 110.7, 75.9 (q,  $J_{\text{C-F}} = 29.5$  Hz), 61.7, 55.0, 13.2.  $^{19}\text{F}$  NMR (376 MHz,  $\text{DMSO-}d_6$ ):  $\delta$  -73.6, -74.3. HRMS (positive ESI):  $[\text{M}+\text{H}]^+$  calcd for  $\text{C}_{19}\text{H}_{18}\text{F}_3\text{N}_2\text{O}_4^+$ : 395.1213. Found: 395.1207.

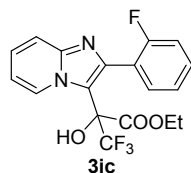

**3,3,3-trifluoro-2-hydroxy-2-(2-(2-fluorophenyl)imidazo[1,2-a]pyridin-3-yl)propionic acid ethyl ester (3ic).** White solid, m.p. = 208 - 209 °C.  $^1\text{H}$  NMR (400 MHz,  $\text{DMSO-}d_6$ ):  $\delta$  8.86 (d,  $J = 6.8$  Hz, 1H), 8.73 (s, 1H, -OH), 7.66 (d,  $J = 9.2$  Hz, 1H), 7.54 - 7.49 (m, 1H), 7.46 - 7.42 (m, 1H), 7.30 (t,  $J = 9.2$  Hz, 1H), 7.28 - 7.25 (m, 2H), 7.07 (dt,  $J = 7.2, 0.8$  Hz, 1H), 3.50 - 3.40 (m, 2H), 1.03 (t,  $J = 7.2$  Hz, 3H).  $^{13}\text{H}$  NMR (100 MHz,  $\text{DMSO-}d_6$ ):  $\delta$  165.0, 160.1 (d,  $J_{\text{C-F}} = 247.0$  Hz), 145.0, 140.3, 132.5, 131.0 (d,  $J_{\text{C-F}} = 8.0$  Hz), 128.5, 126.9, 124.3 (q,  $J_{\text{C-F}} = 285.5$  Hz), 123.4 (d,  $J_{\text{C-F}} = 3.3$  Hz), 121.6 (d,  $J_{\text{C-F}} = 15.6$  Hz), 116.9, 115.2 (d,  $J_{\text{C-F}} = 21.3$  Hz), 113.9, 112.7, 75.9 (q,  $J_{\text{C-F}} = 29.7$  Hz), 62.1, 13.1.  $^{19}\text{F}$  NMR (376 MHz,  $\text{DMSO-}d_6$ ):  $\delta$  -74.5, -112.4. HRMS (positive ESI):  $[\text{M}+\text{H}]^+$  calcd for  $\text{C}_{18}\text{H}_{15}\text{F}_4\text{N}_2\text{O}_3^+$ : 383.1013. Found: 383.1007.

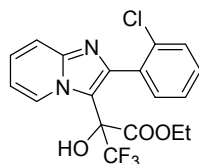

**3id**

**3,3,3-trifluoro-2-hydroxy-2-(2-(2-chlorophenyl)imidazo[1,2-a]pyridin-3-yl)-propionic acid ethyl ester (3id).** White solid, m.p. = 199 - 200°C. <sup>1</sup>H NMR(400 MHz, DMSO-*d*<sub>6</sub>): δ 8.87 (d, *J* = 6.8 Hz, 1H), 8.71 (s, 1H, -OH), 7.66 (d, *J* = 9.2 Hz, 1H), 7.56 (dd, *J* = 8.0, 1.2 Hz, 1H), 7.49 – 7.37 (m, 3H), 7.29 (d, *J* = 6.4 Hz, 1H), 7.06 (dt, *J* = 6.8, 1.2 Hz, 1H), 3.49 – 3.37 (m, 2H), 1.04 (t, *J* = 7.2 Hz, 3H). <sup>13</sup>C NMR (100 MHz, DMSO-*d*<sub>6</sub>): δ 164.8, 144.9, 143.2, 133.9, 132.8, 132.3, 130.3, 129.1, 128.5, 126.1, 124.3 (q, *J*<sub>C-F</sub> = 286.7 Hz), 117.1, 113.5, 112.6, 76.1 (q, *J*<sub>C-F</sub> = 29.6 Hz), 62.0, 13.2. <sup>19</sup>F NMR (376 MHz, DMSO-*d*<sub>6</sub>): δ -72.9, -74.4. HRMS (positive ESI): [M+H]<sup>+</sup> calcd for C<sub>18</sub>H<sub>15</sub>ClF<sub>3</sub>N<sub>2</sub>O<sub>3</sub><sup>+</sup>: 399.0718. Found: 399.0712.

# Copies of the NMR Spectra

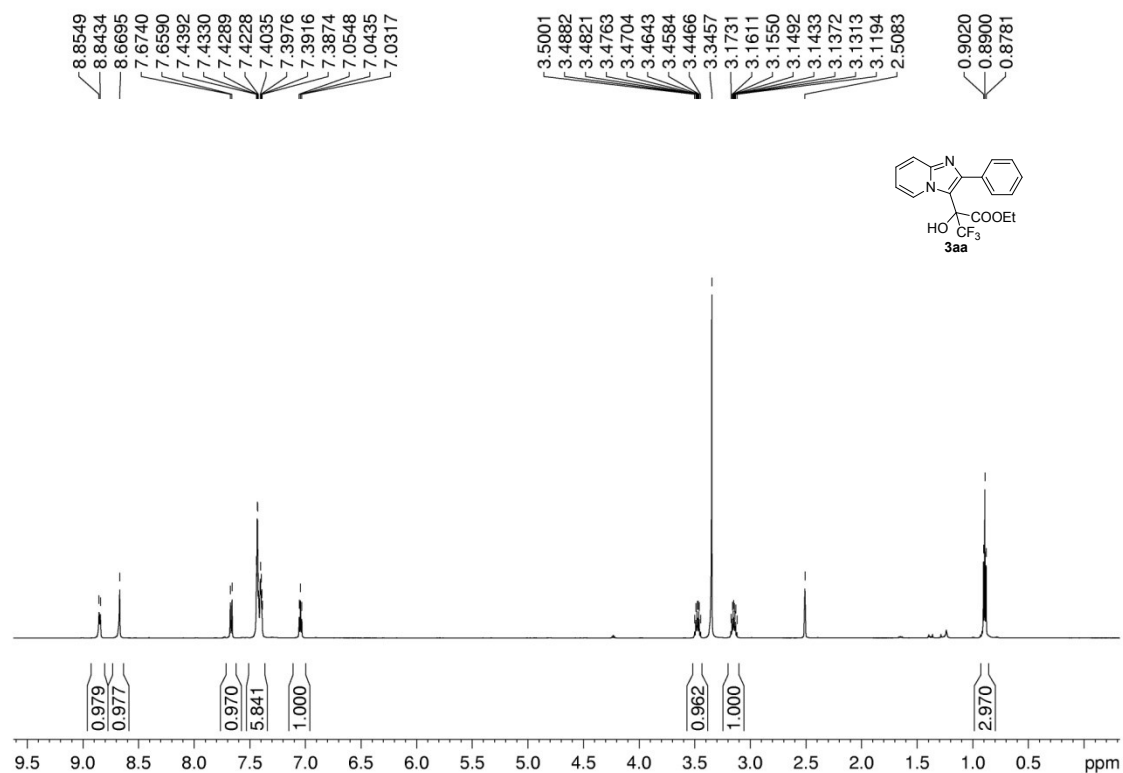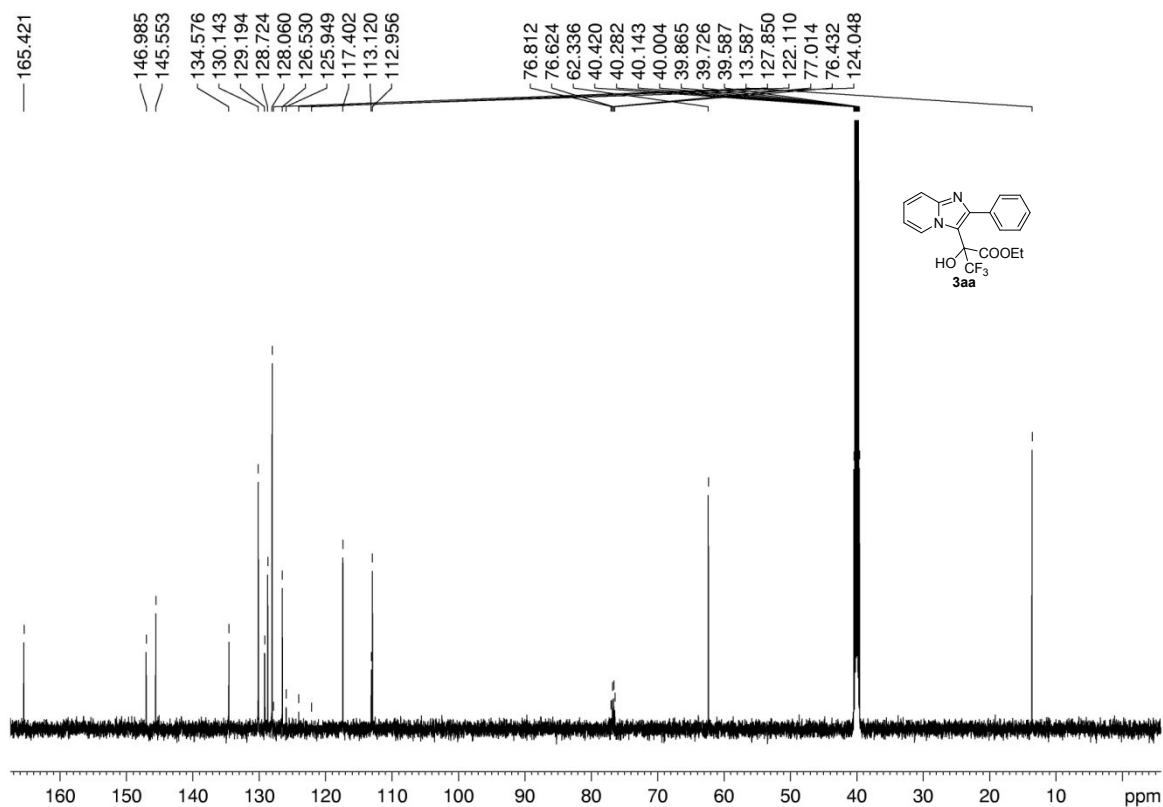



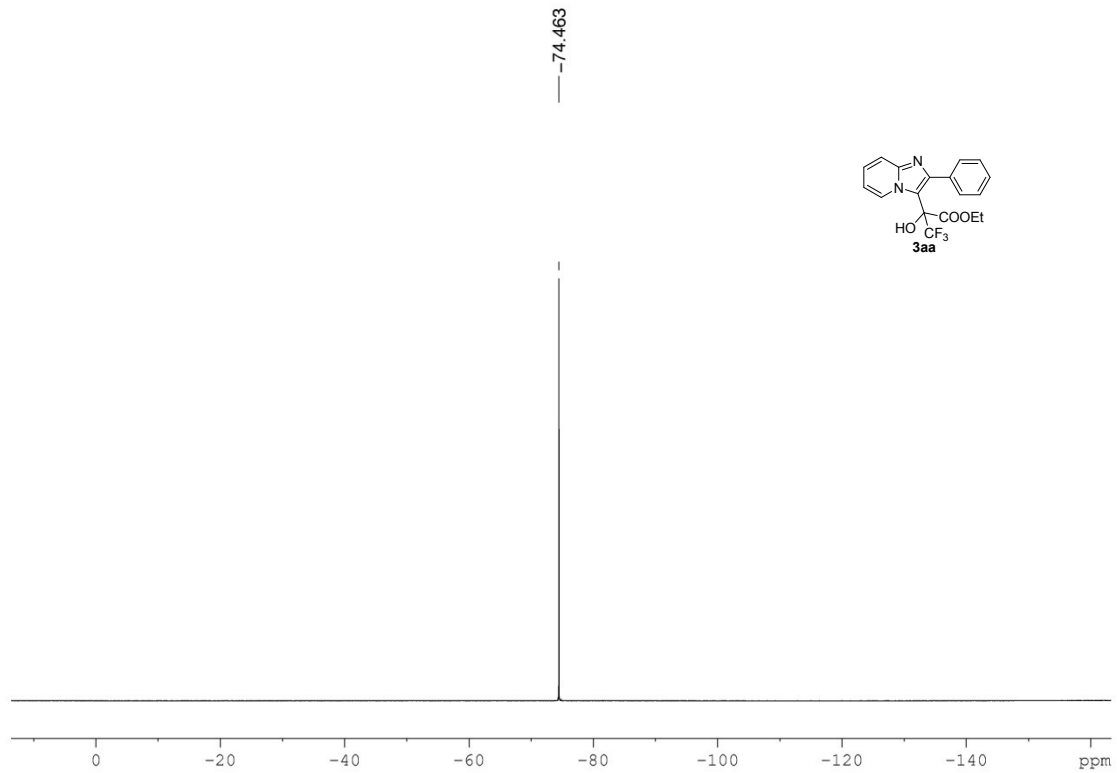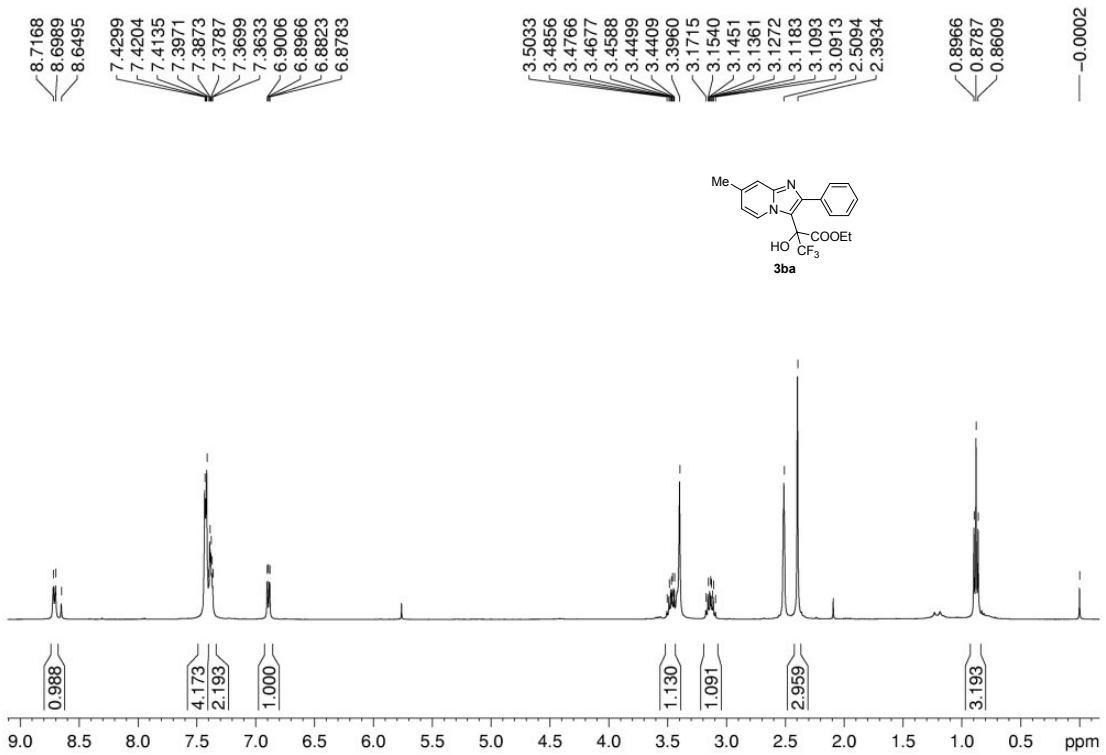

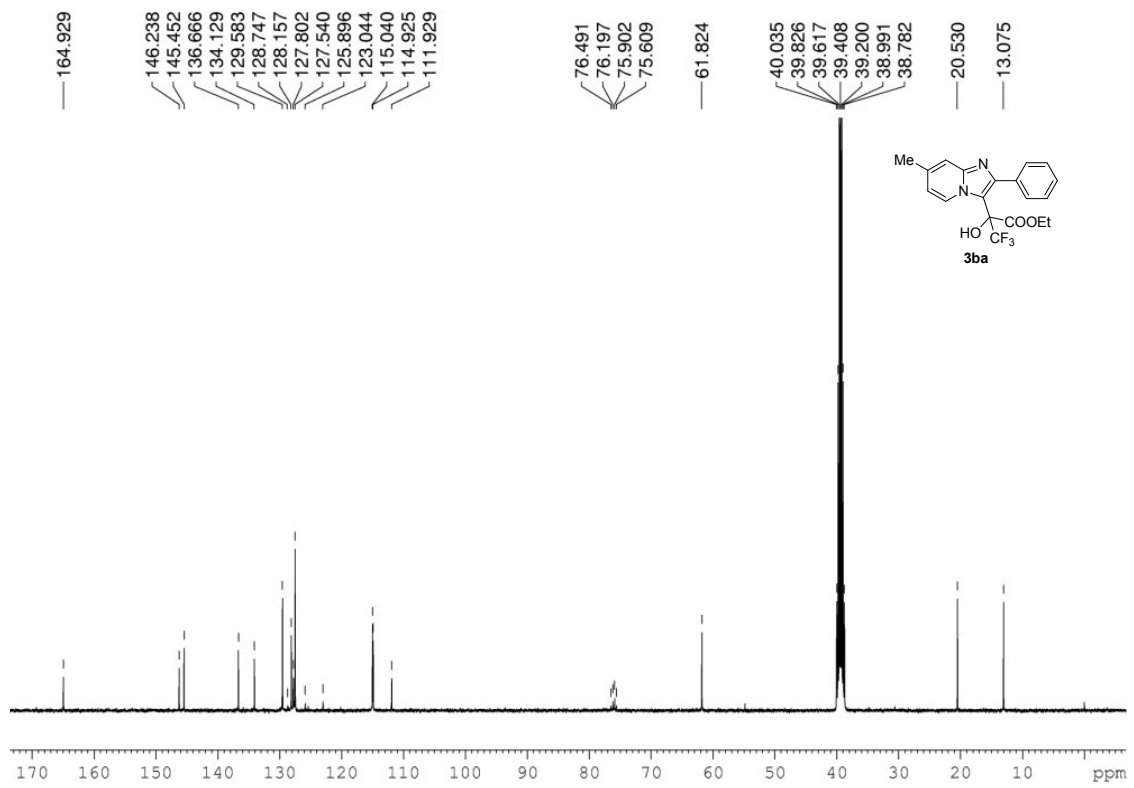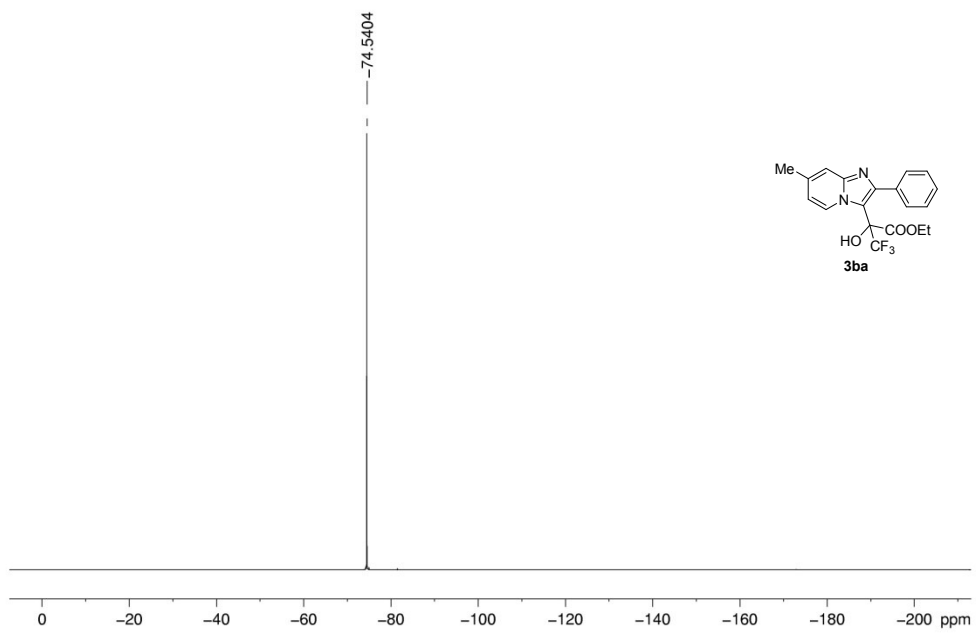

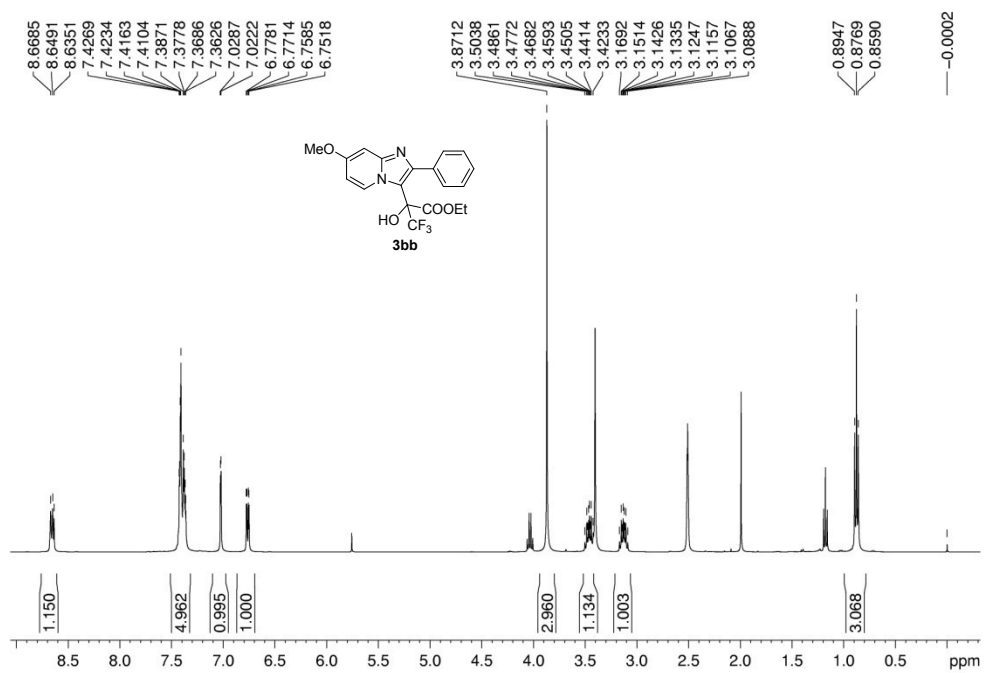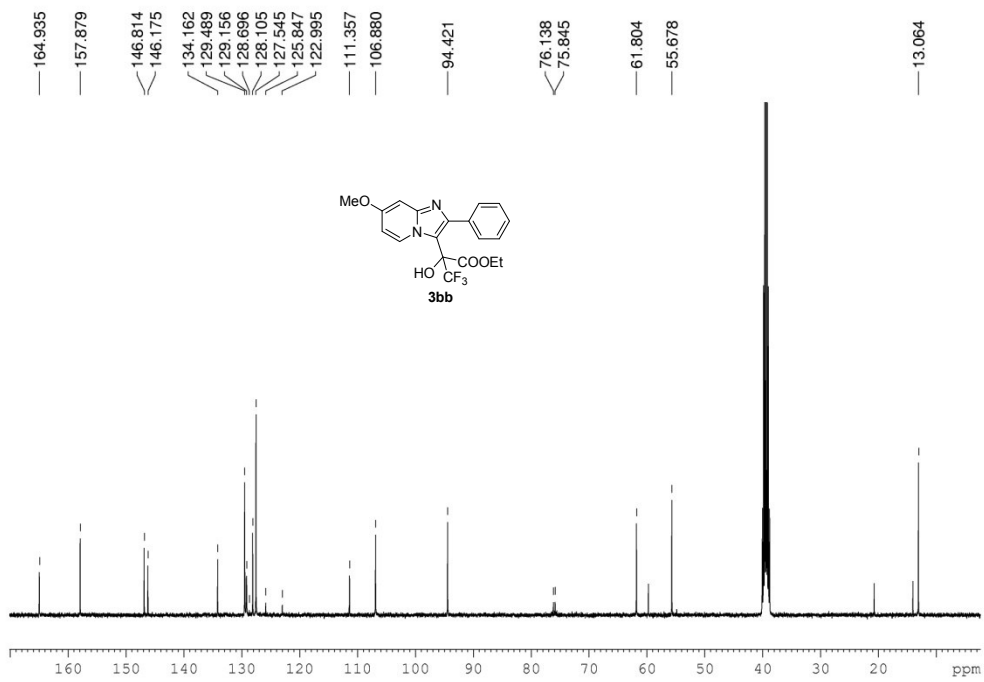

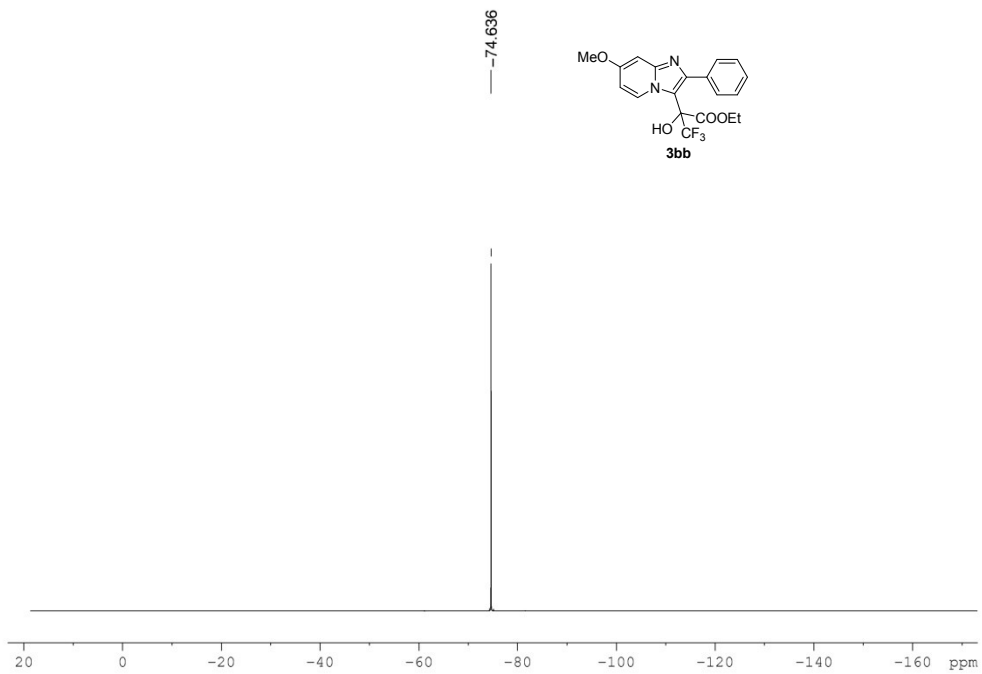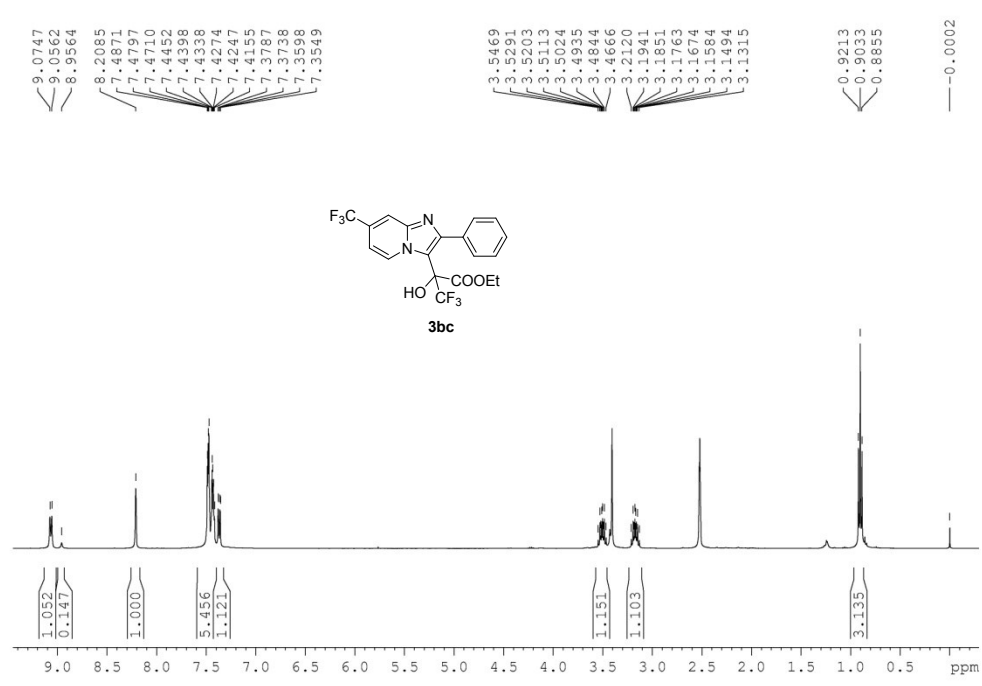

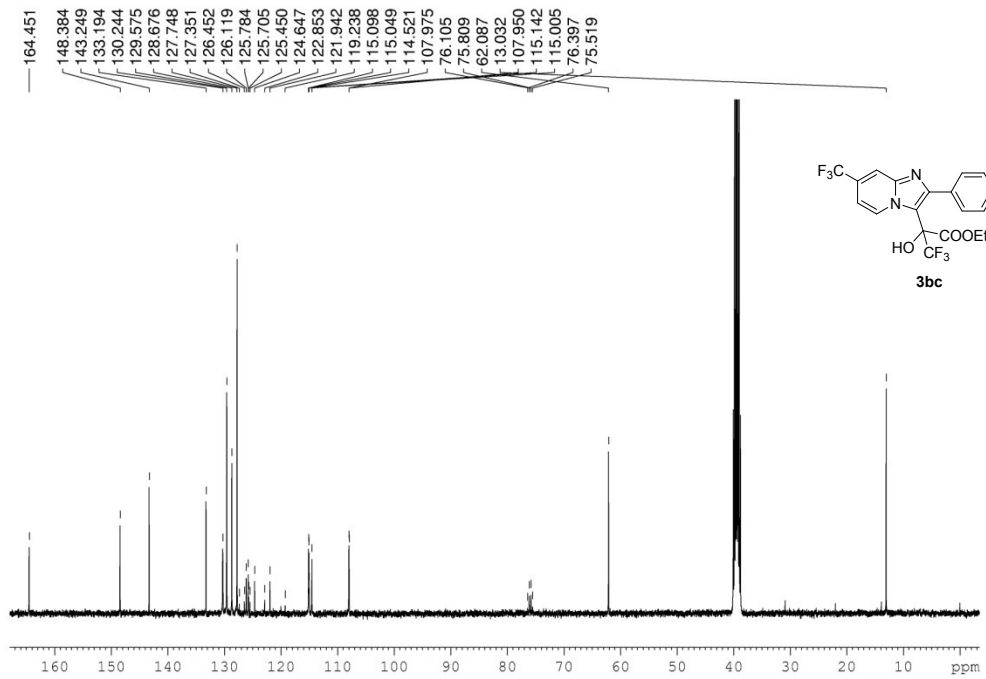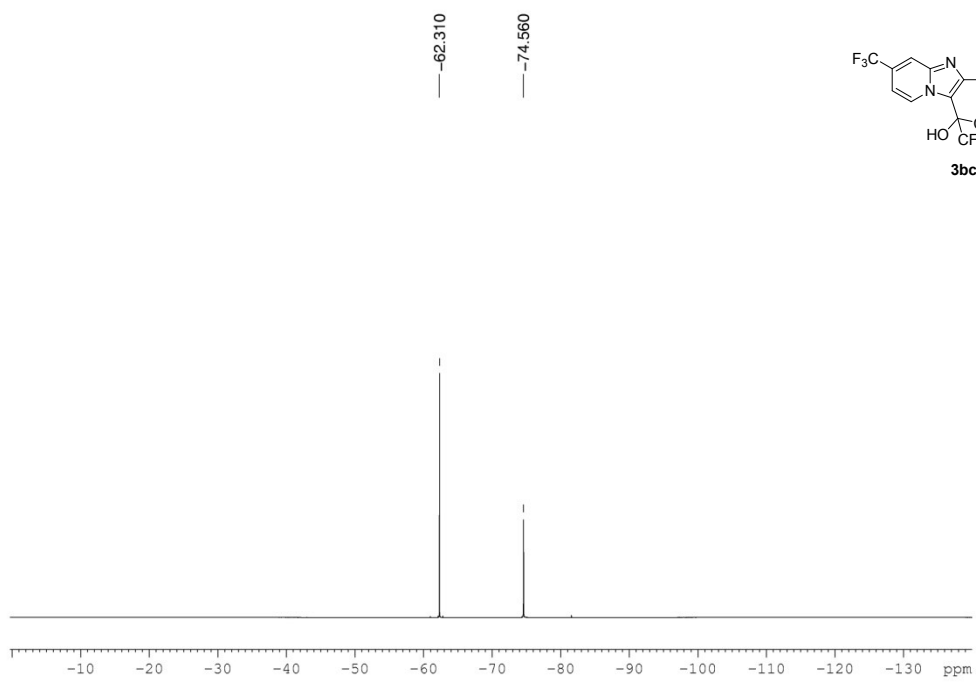

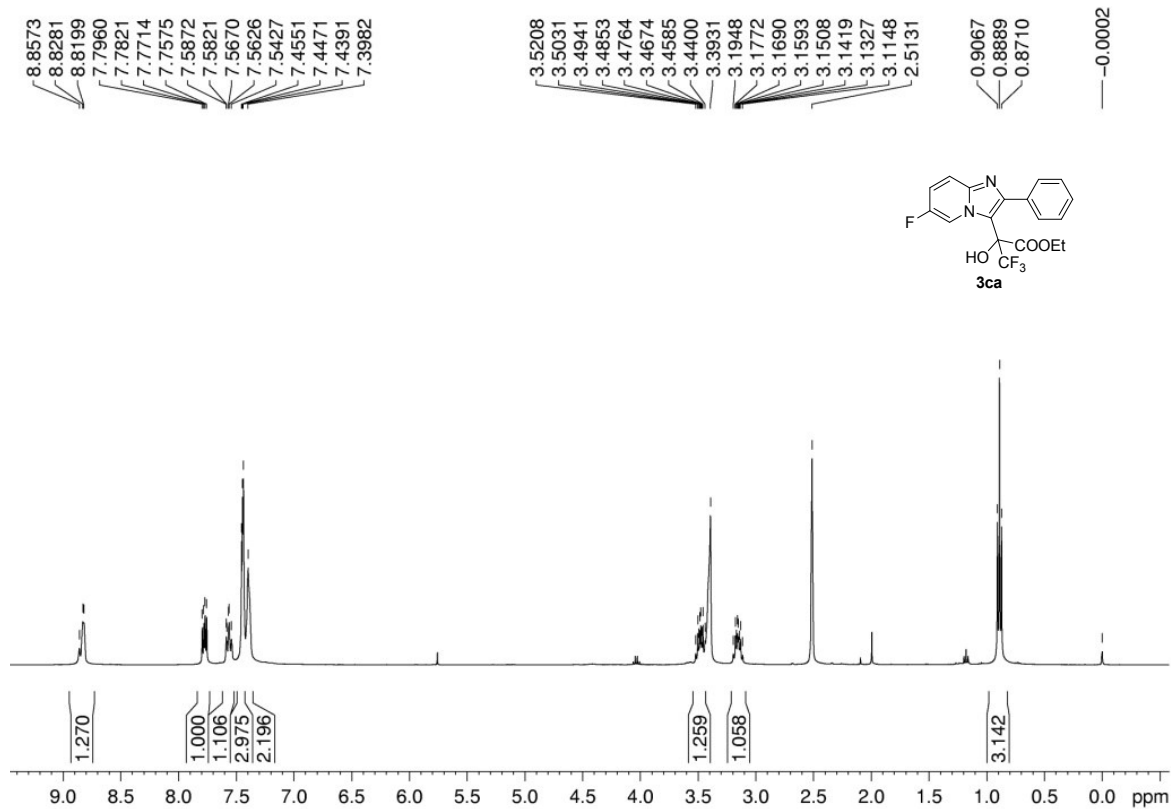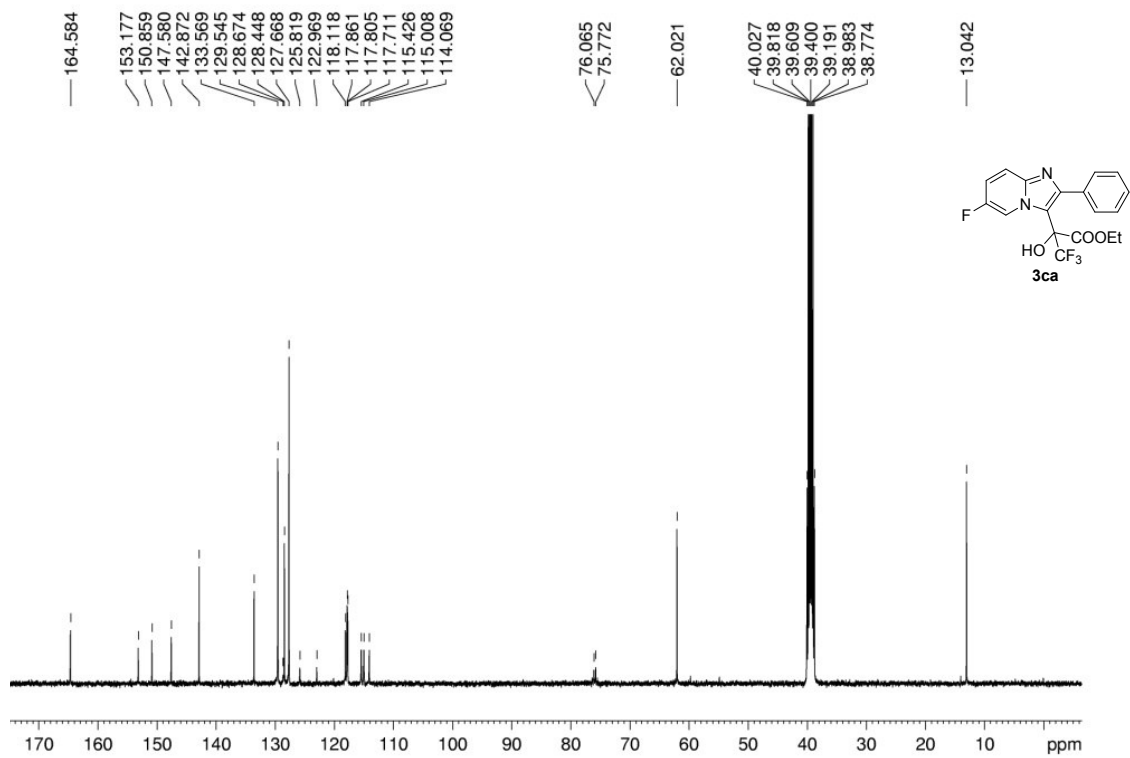

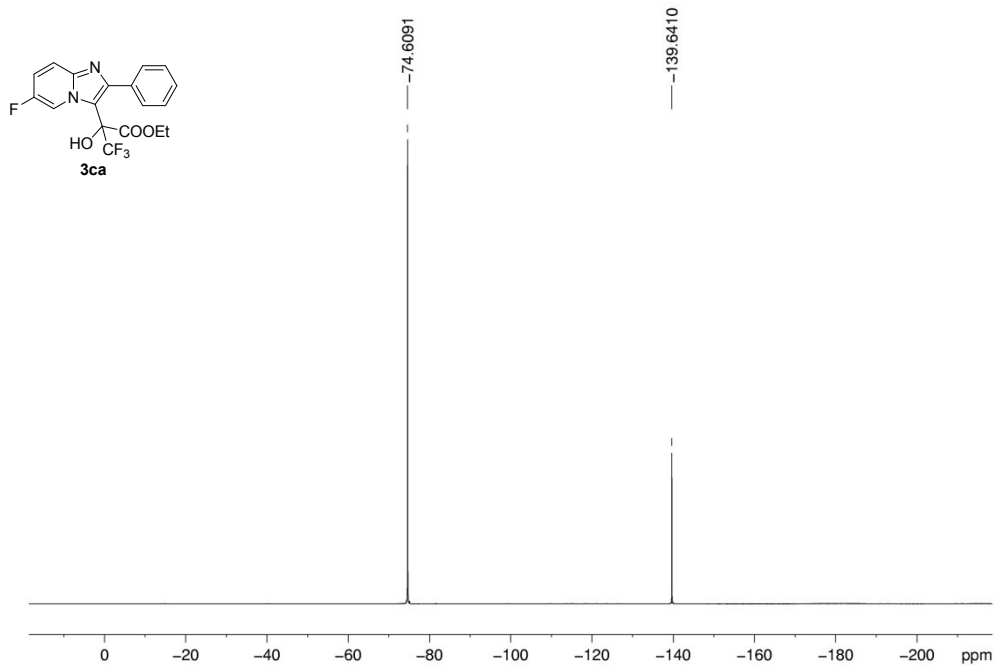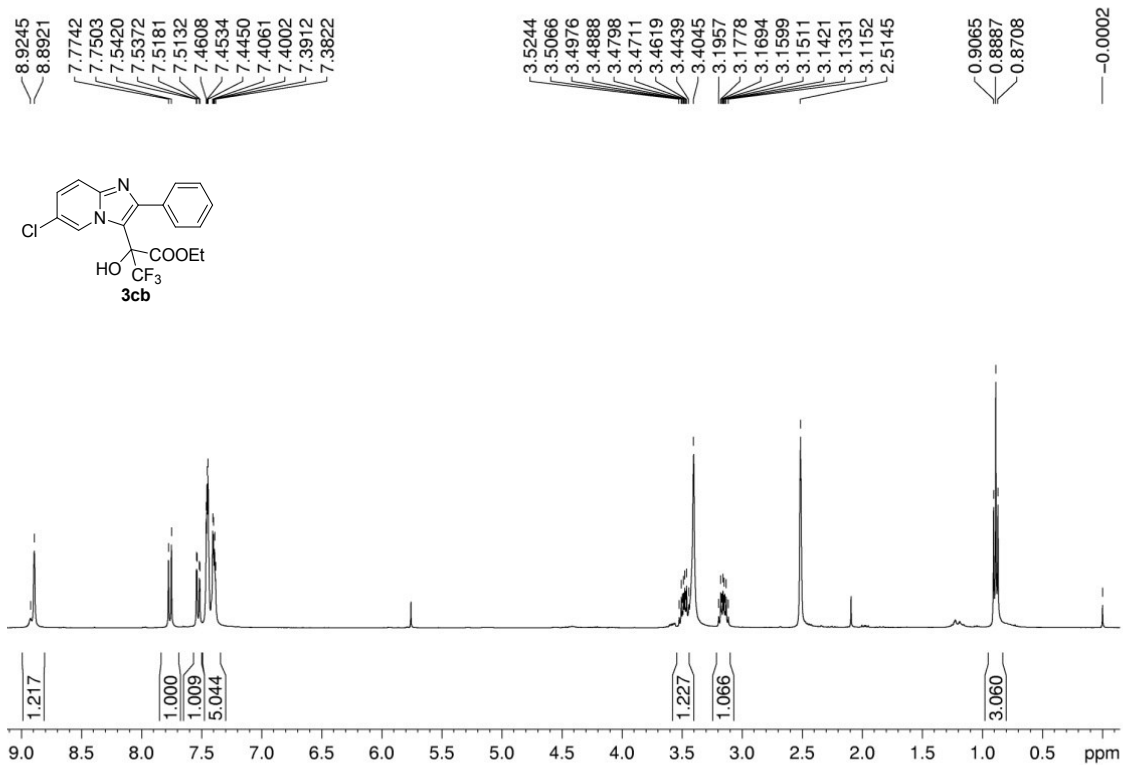

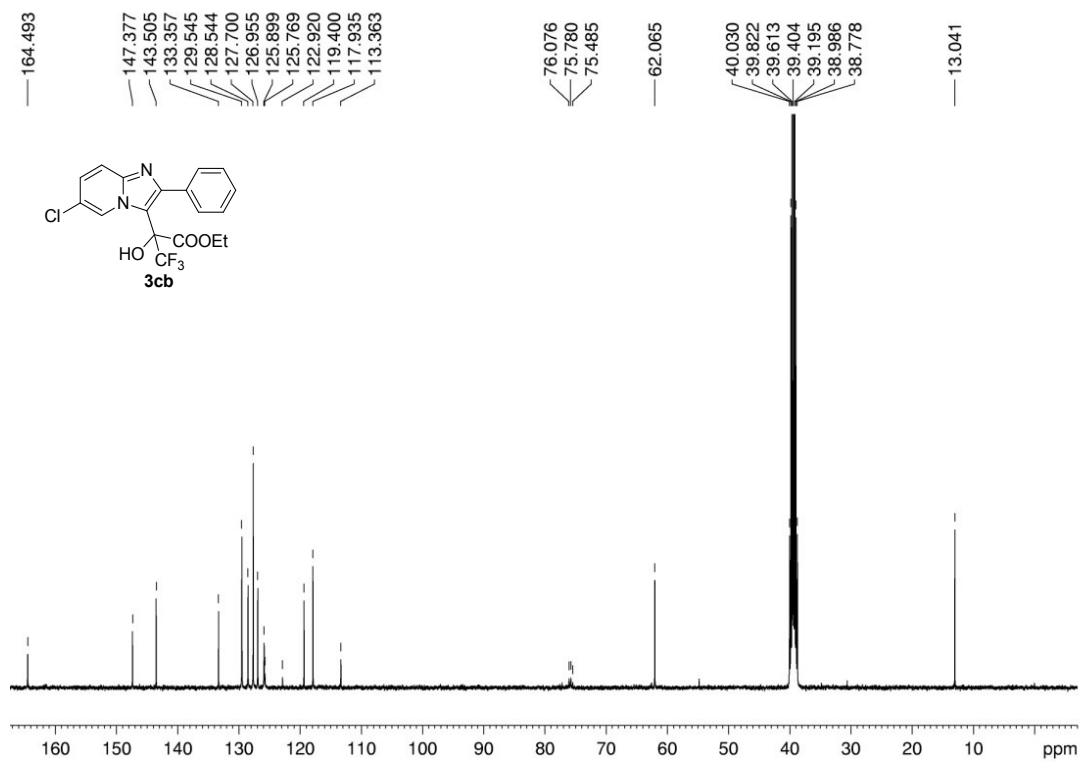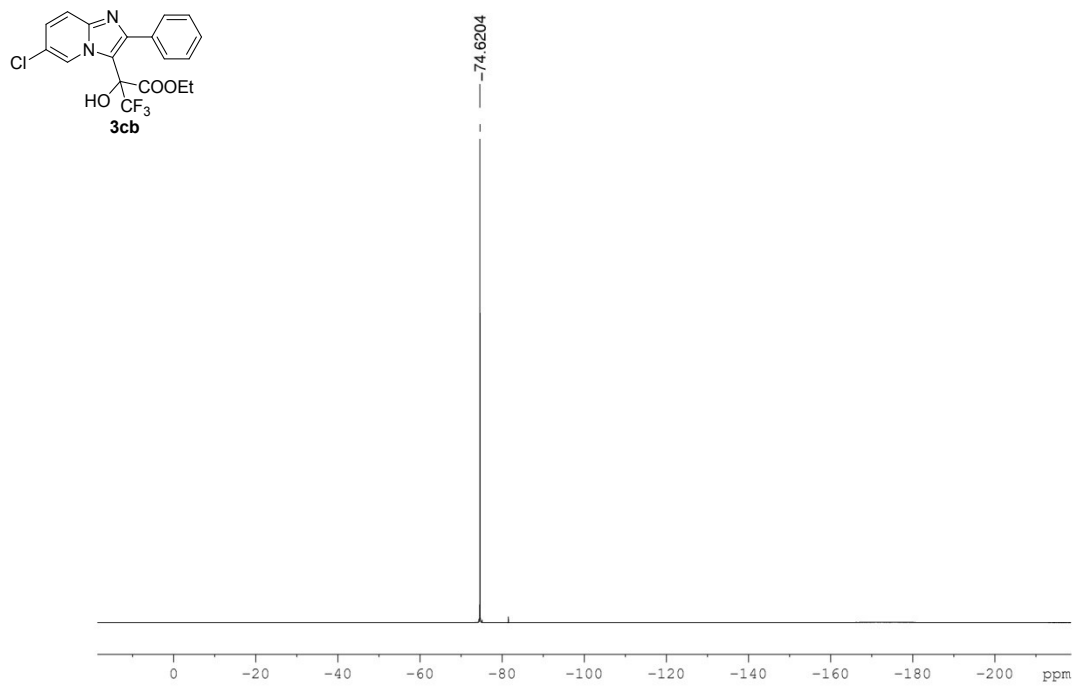



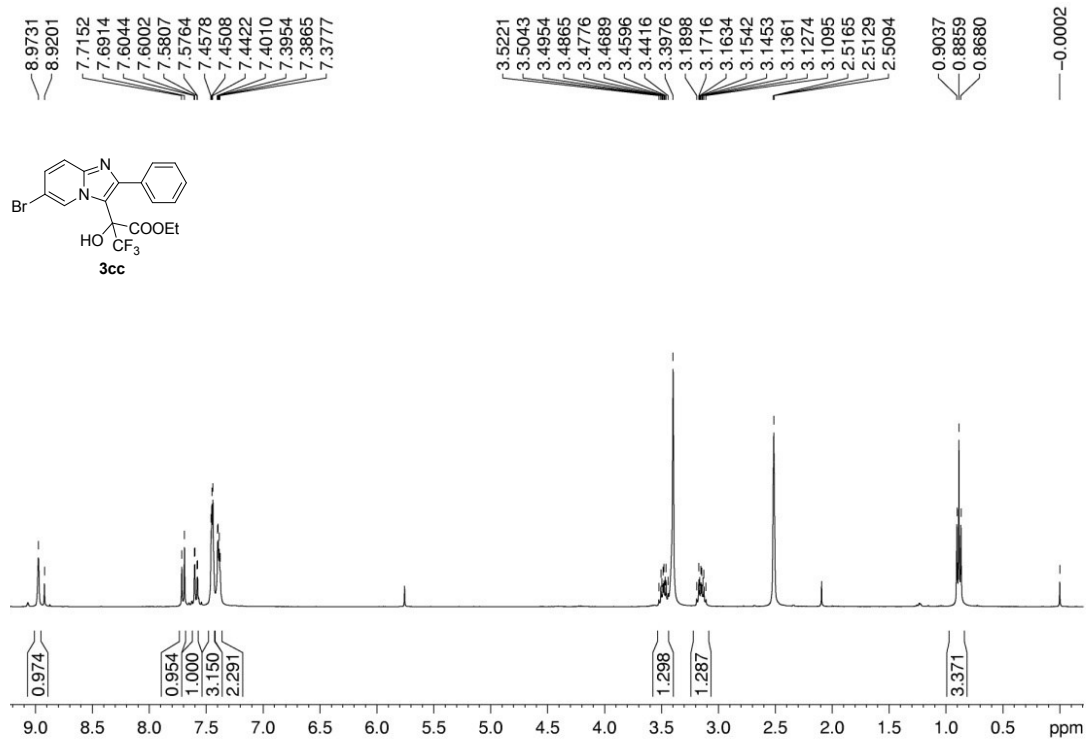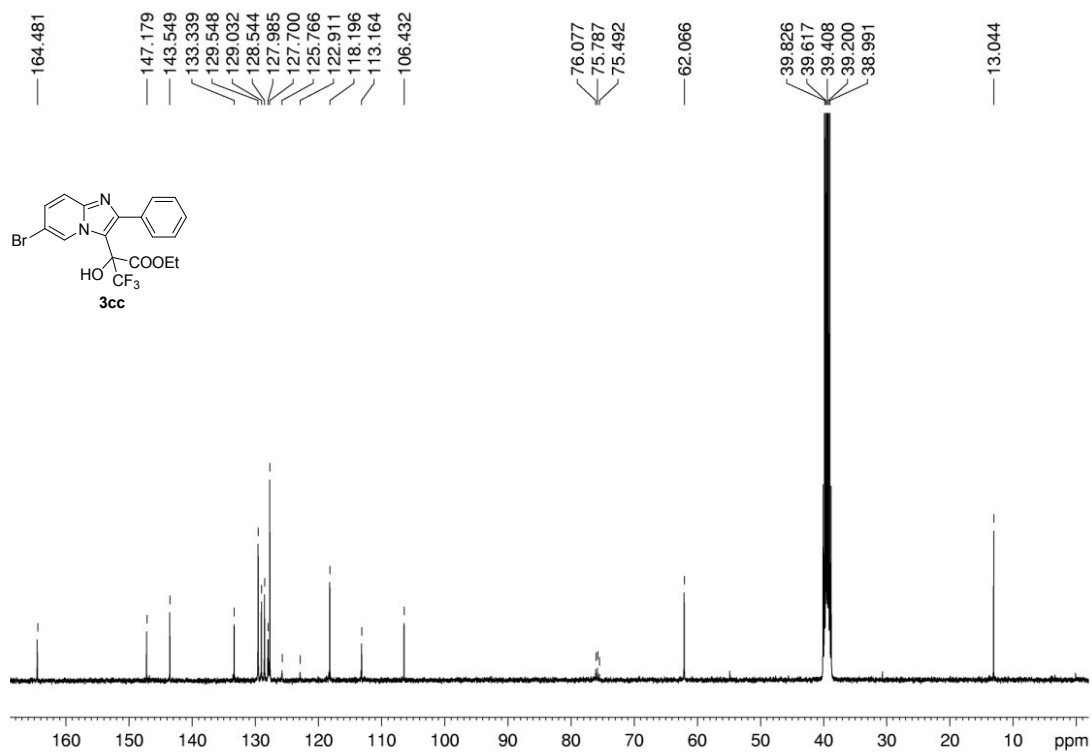

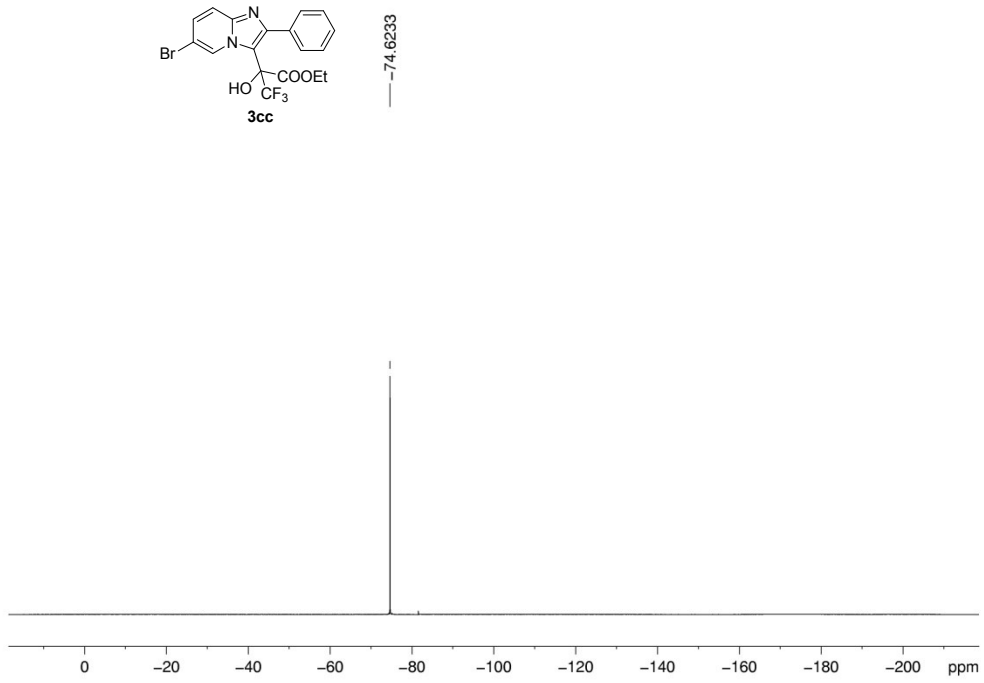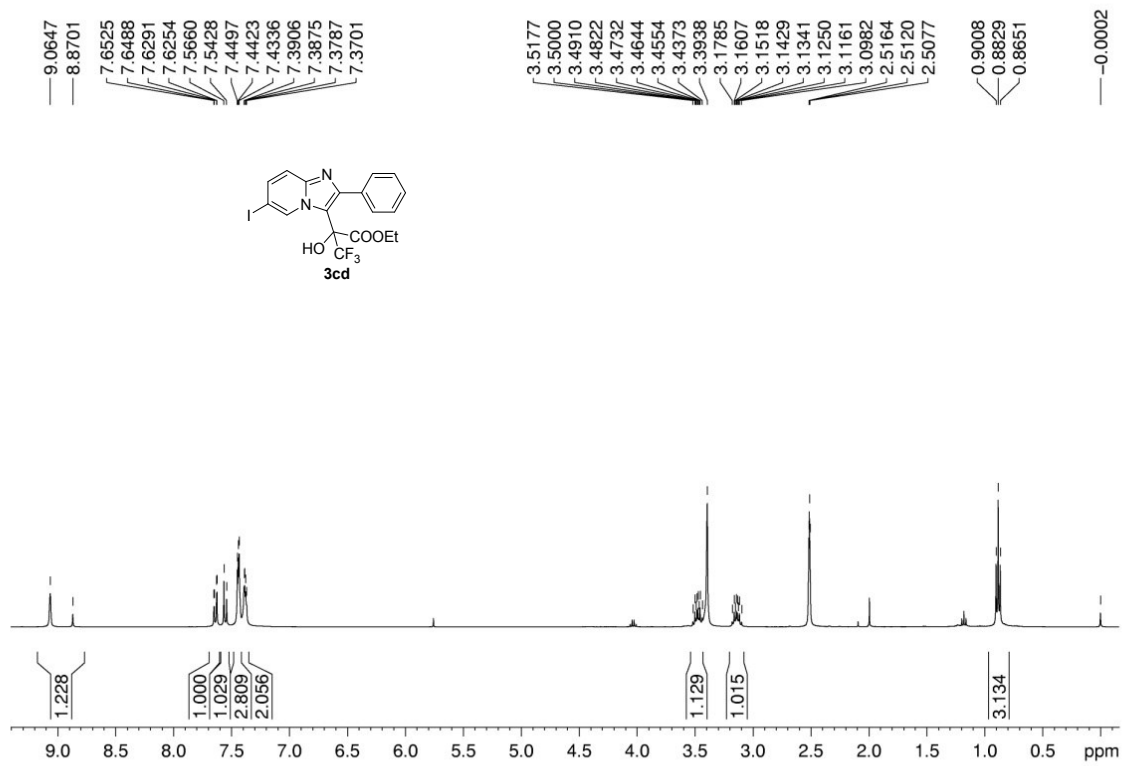

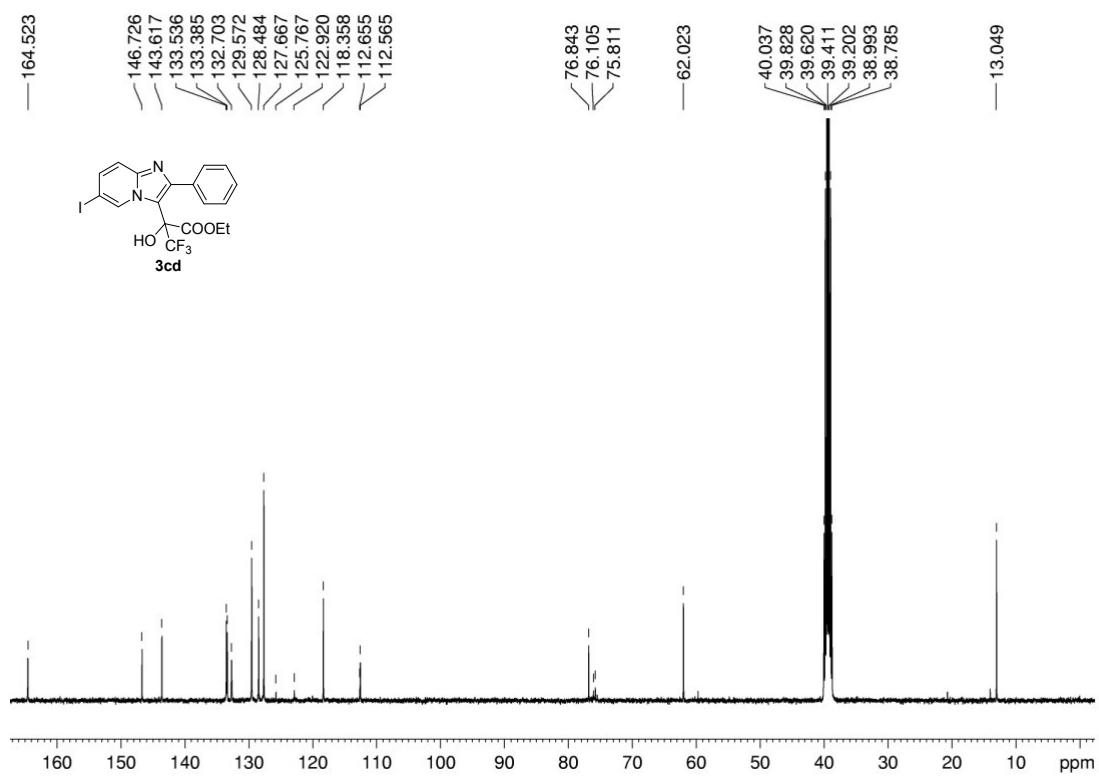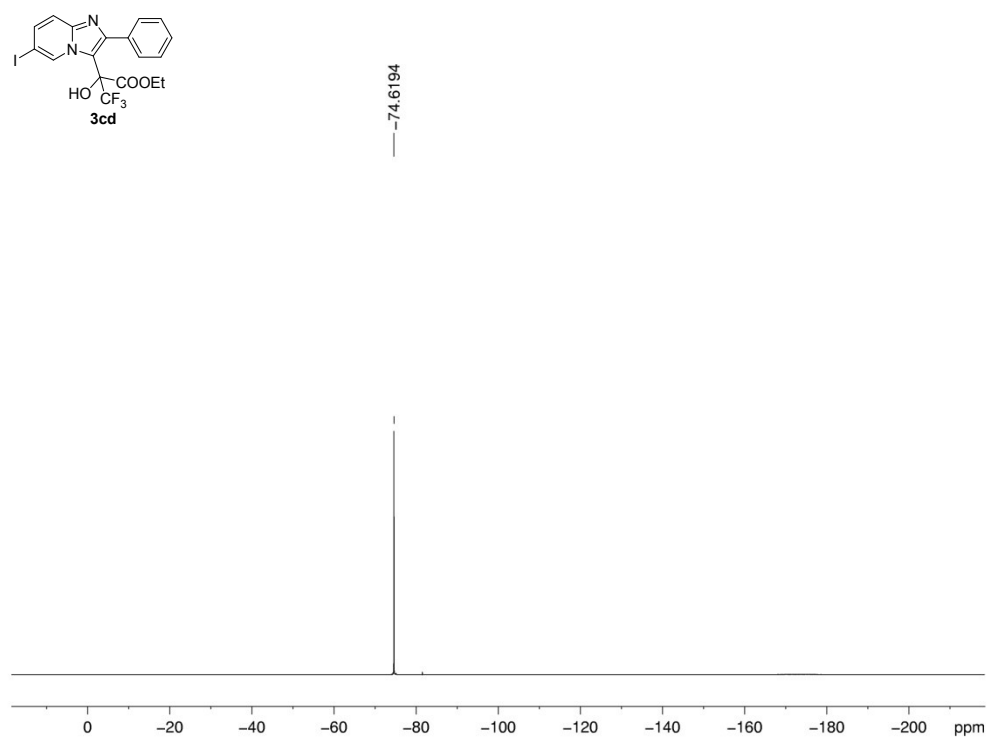

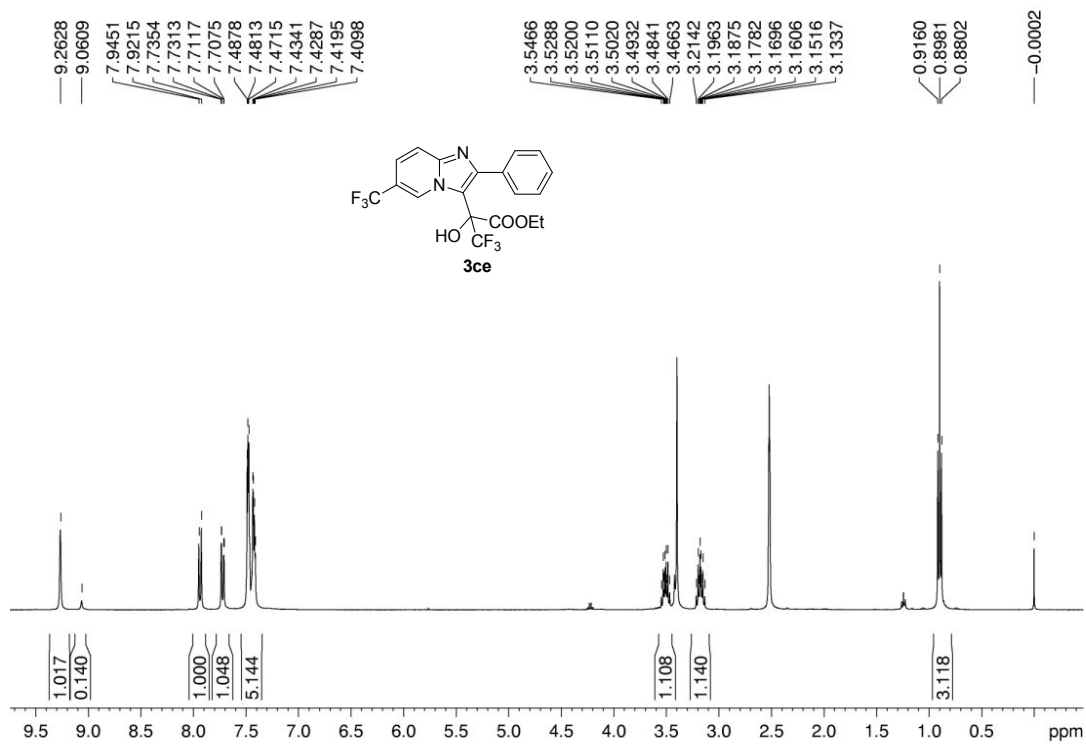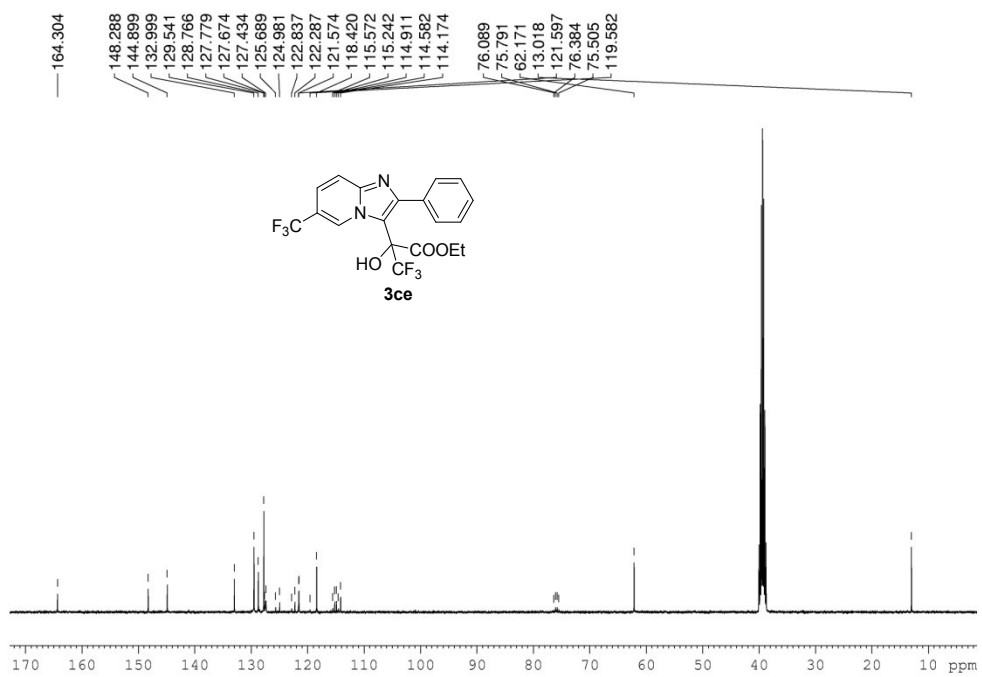

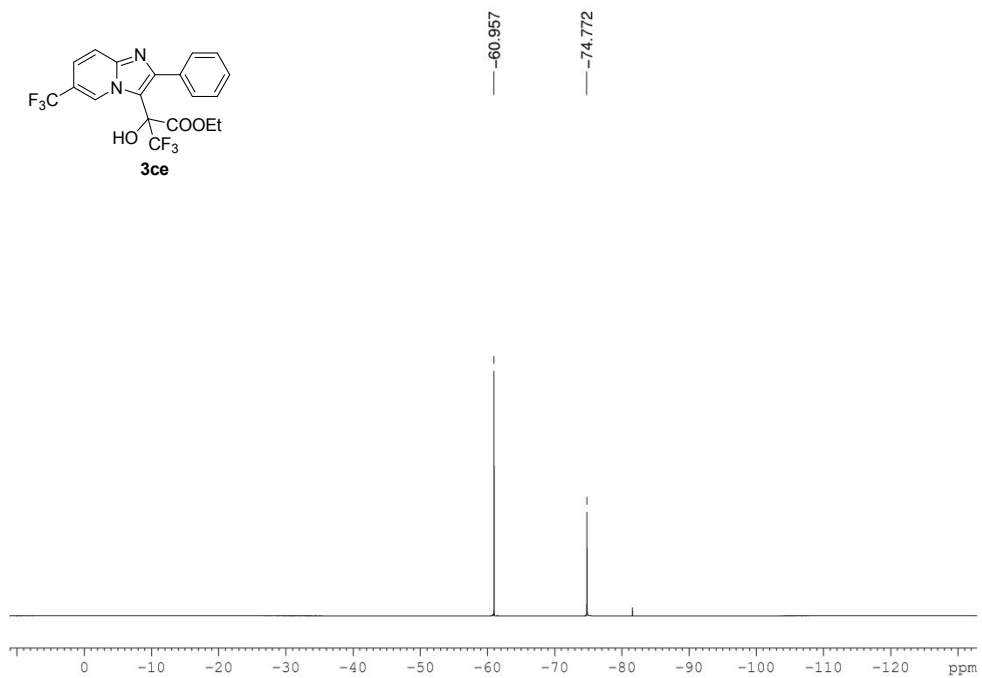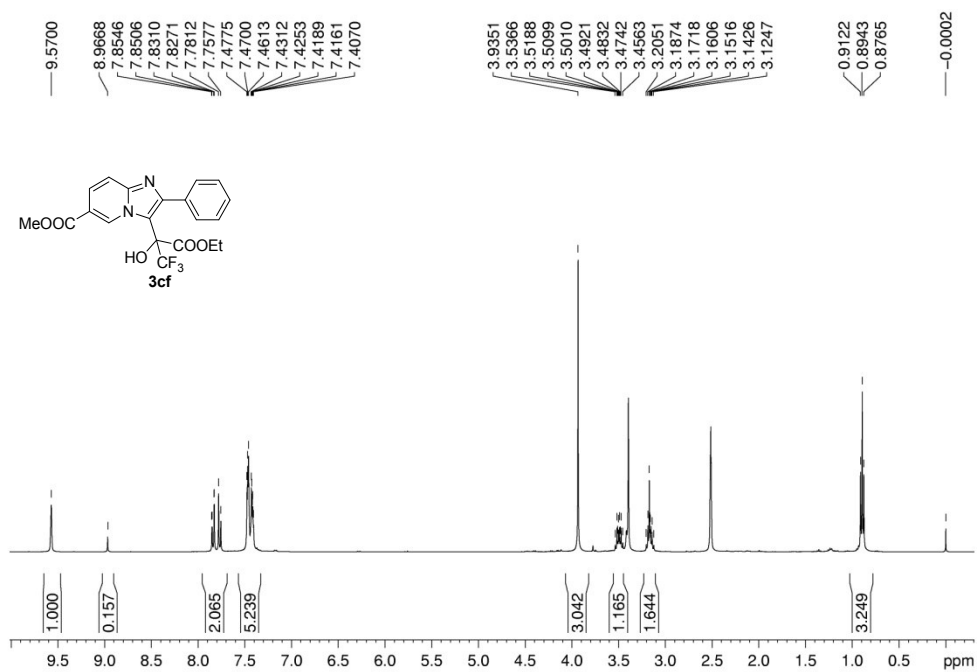

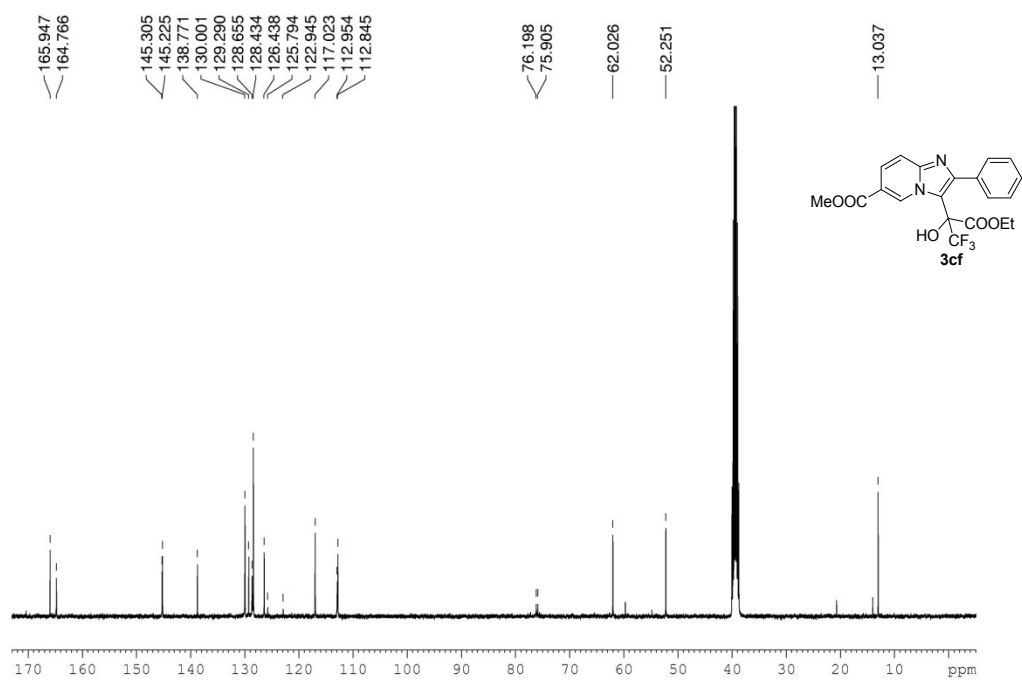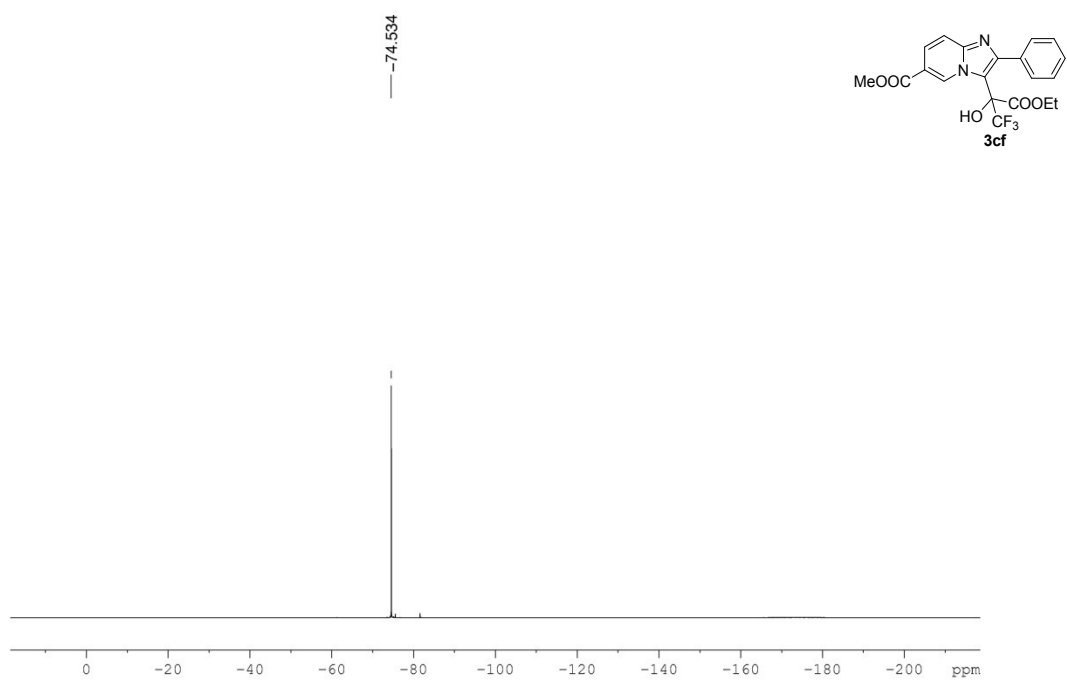

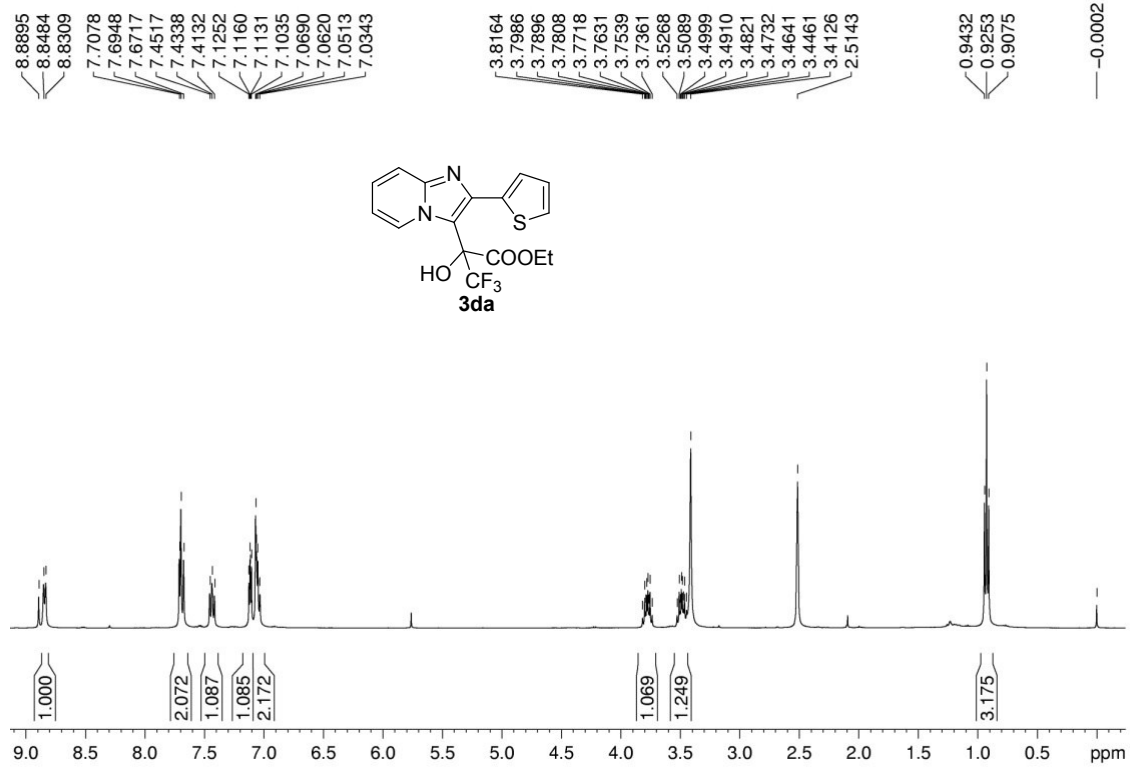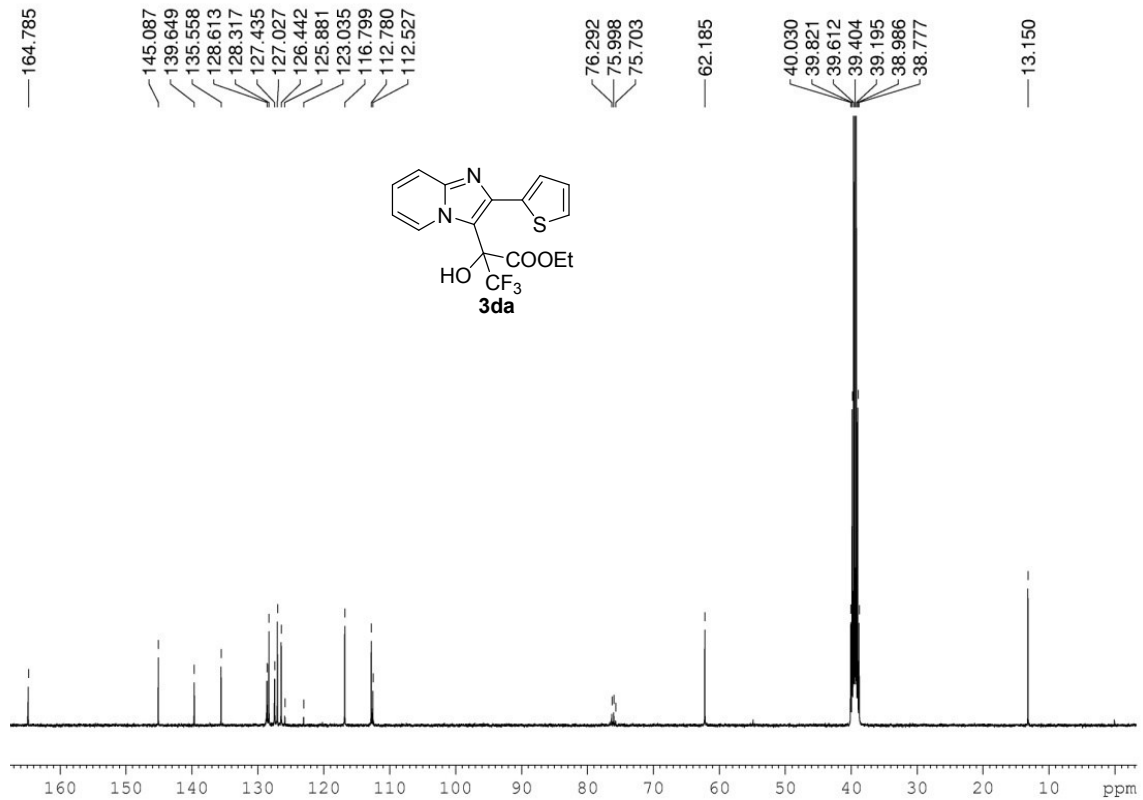

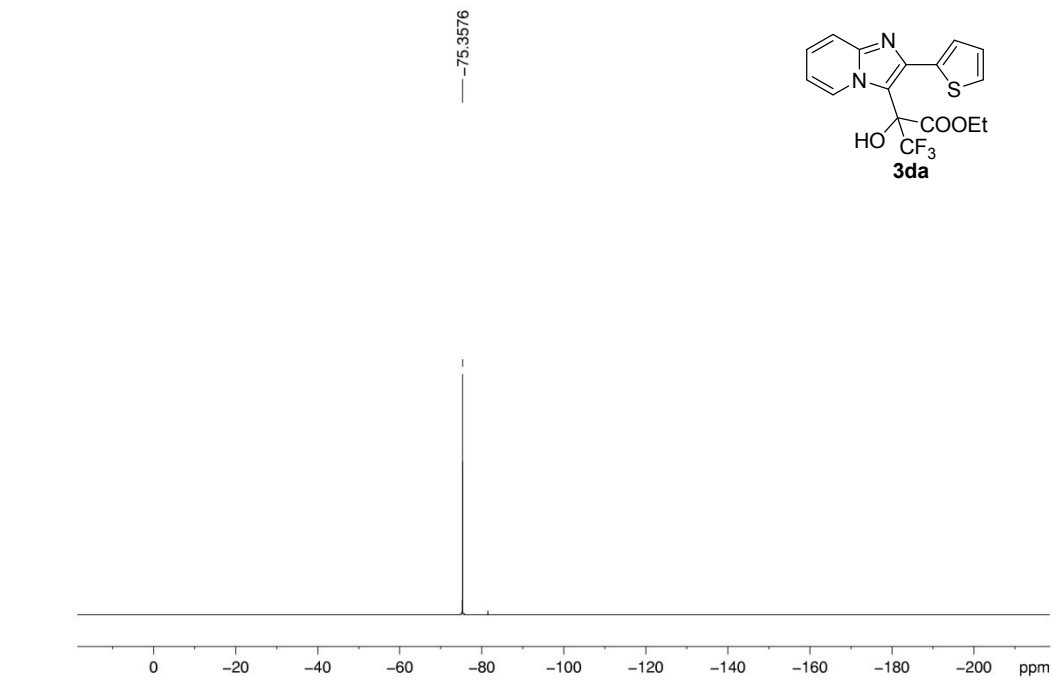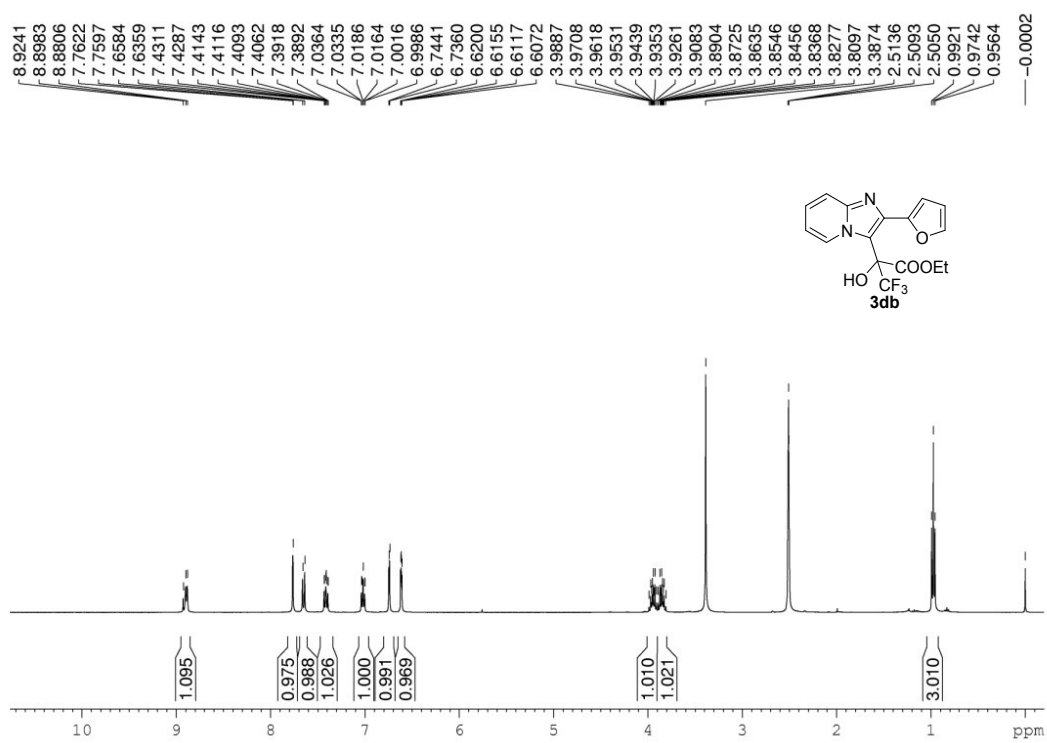



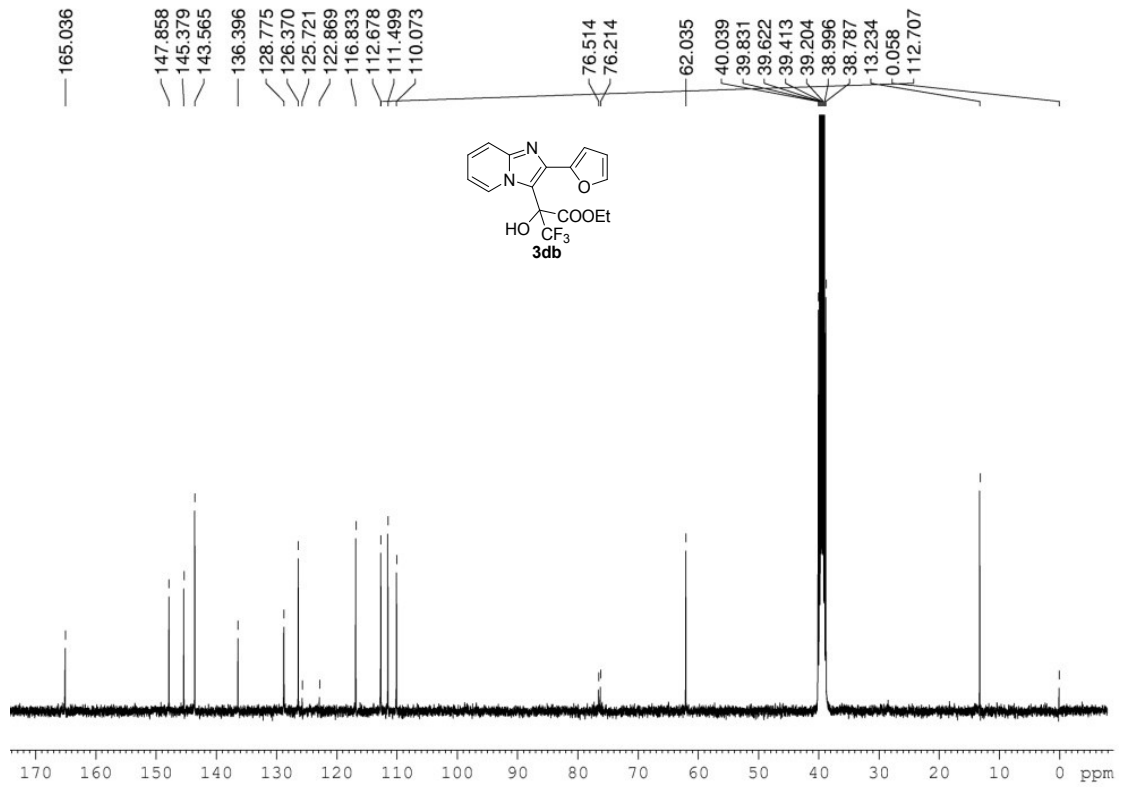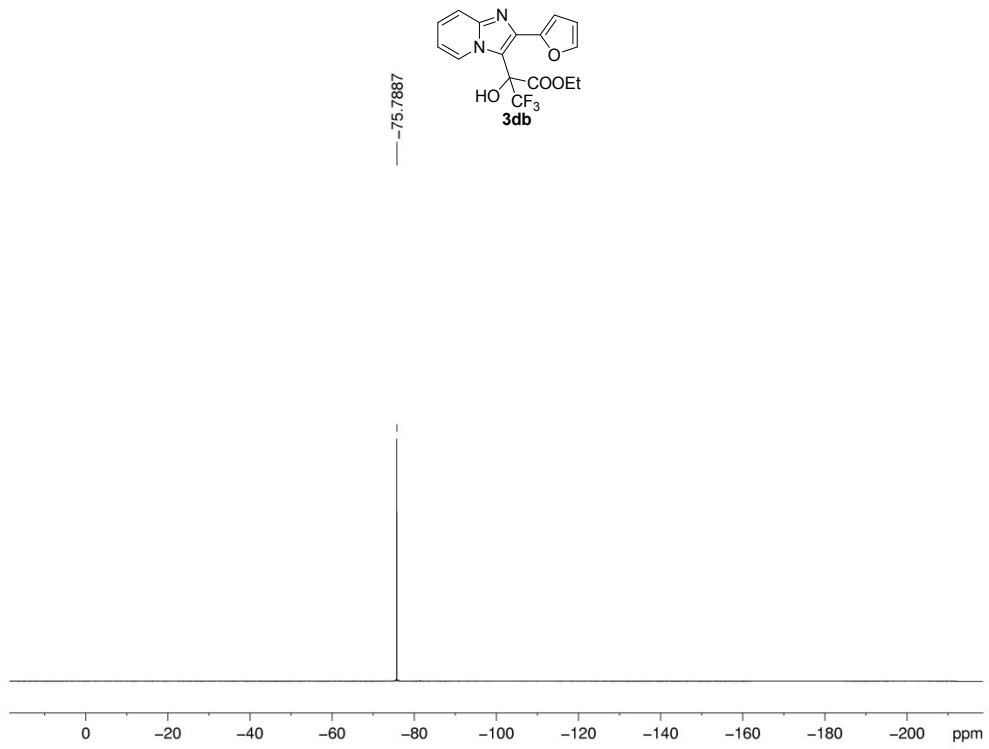

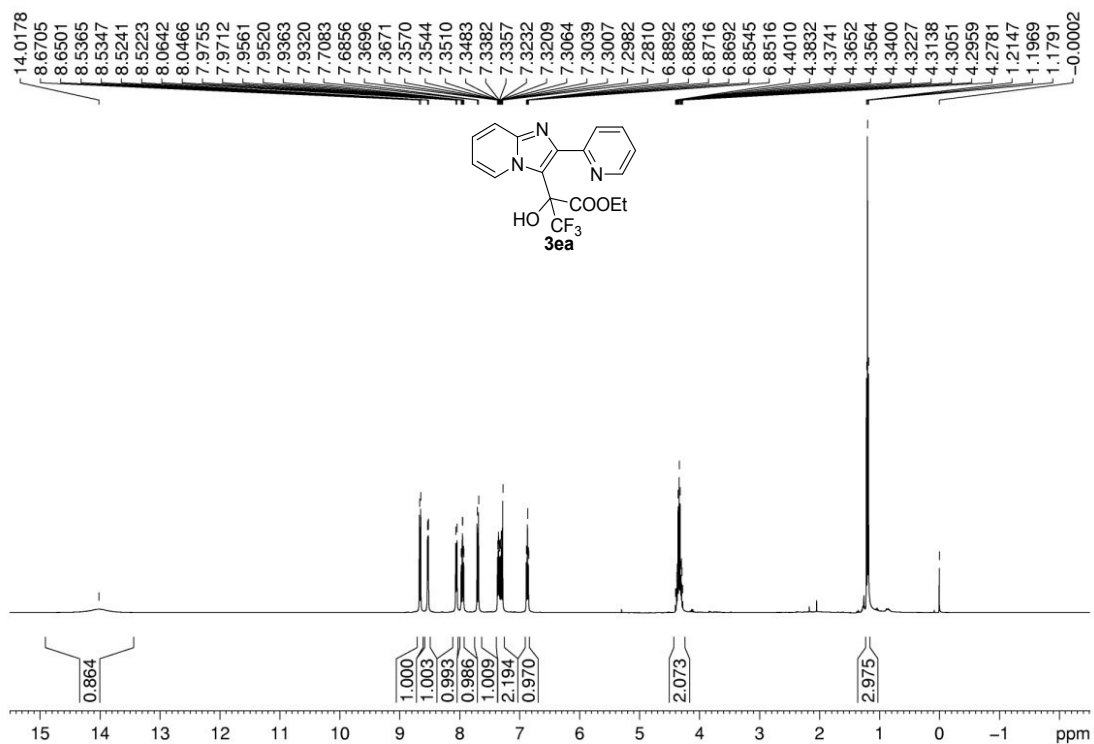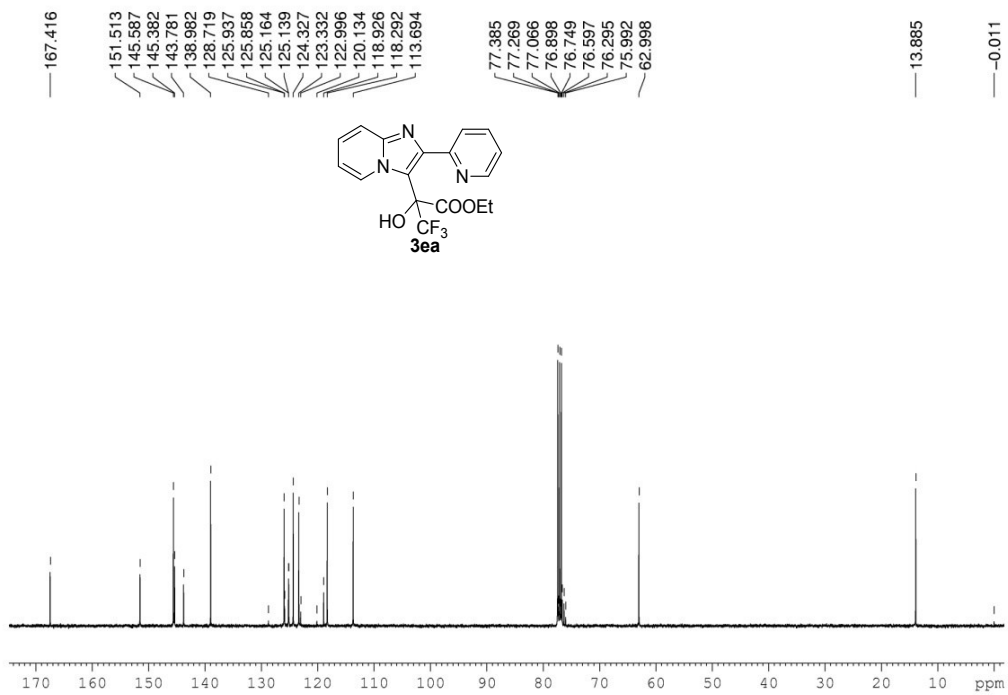

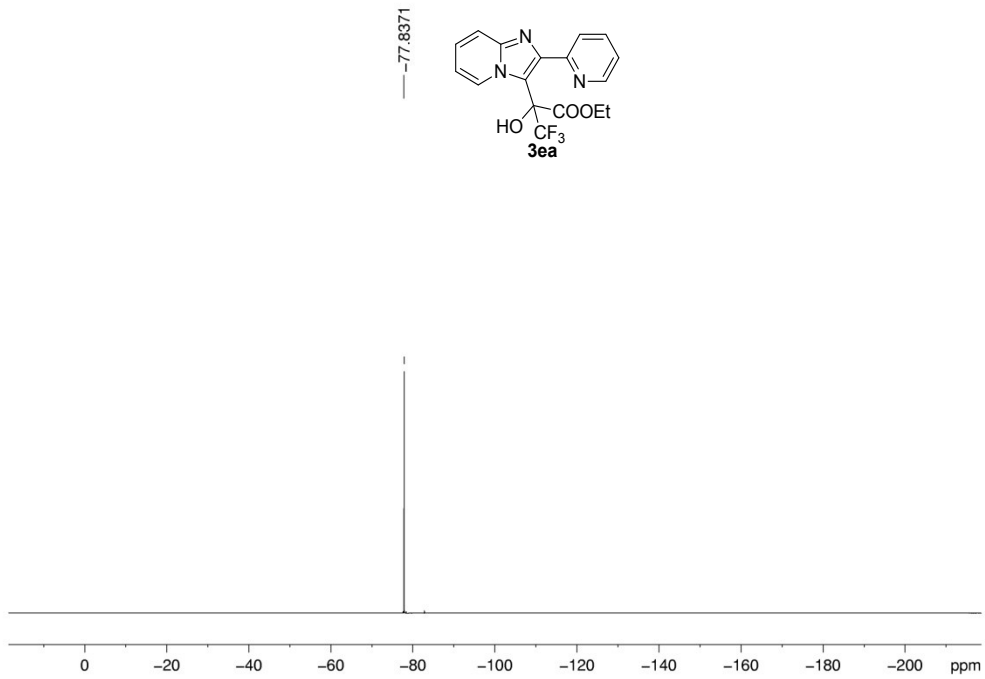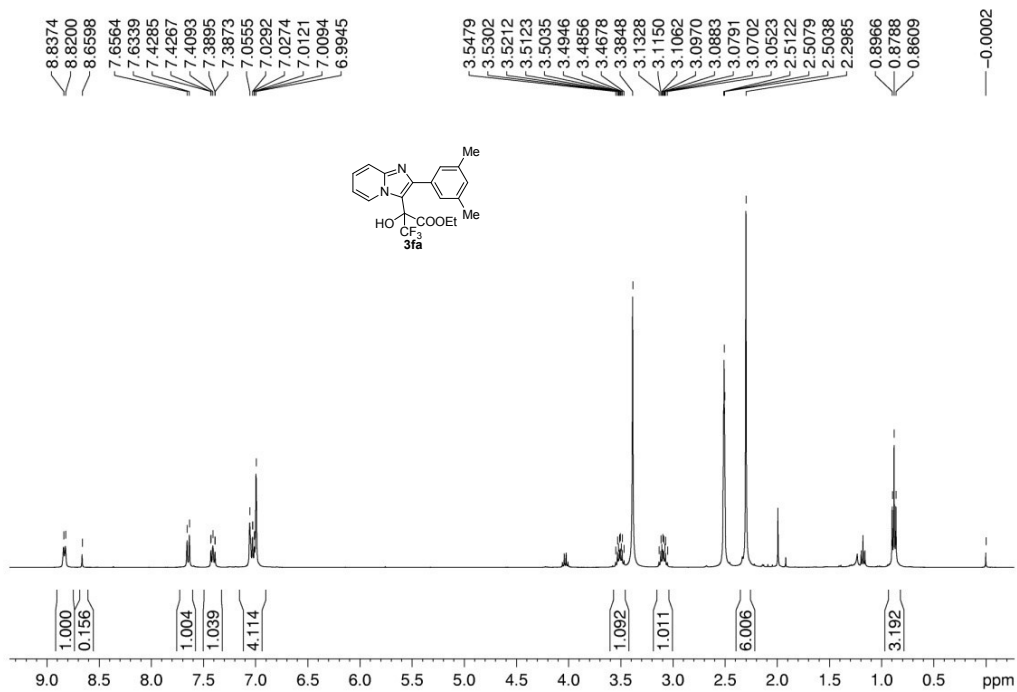

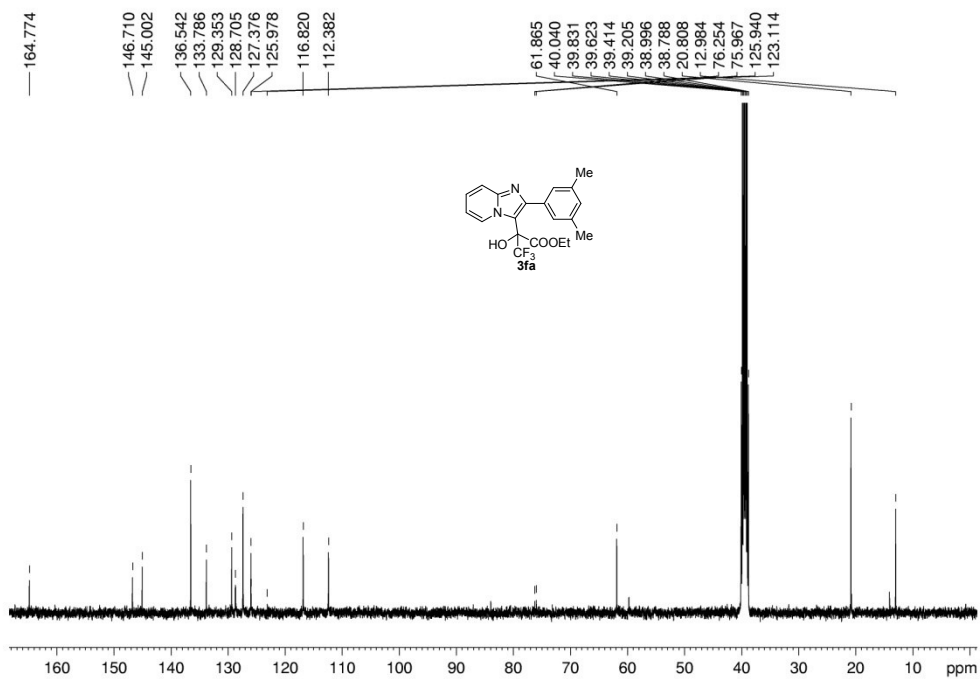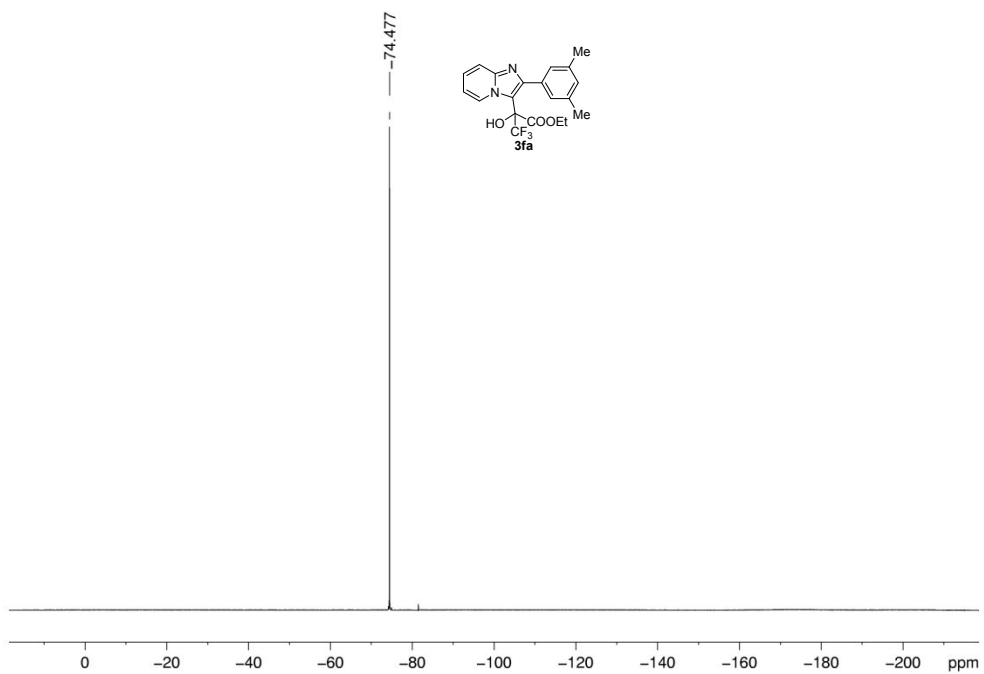

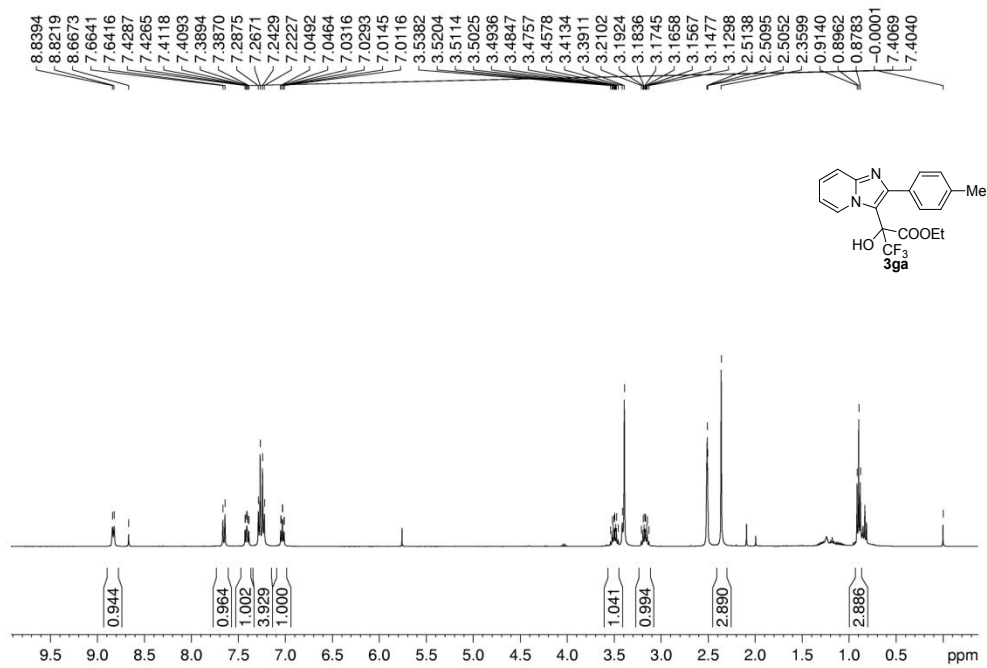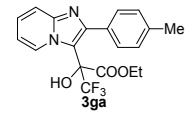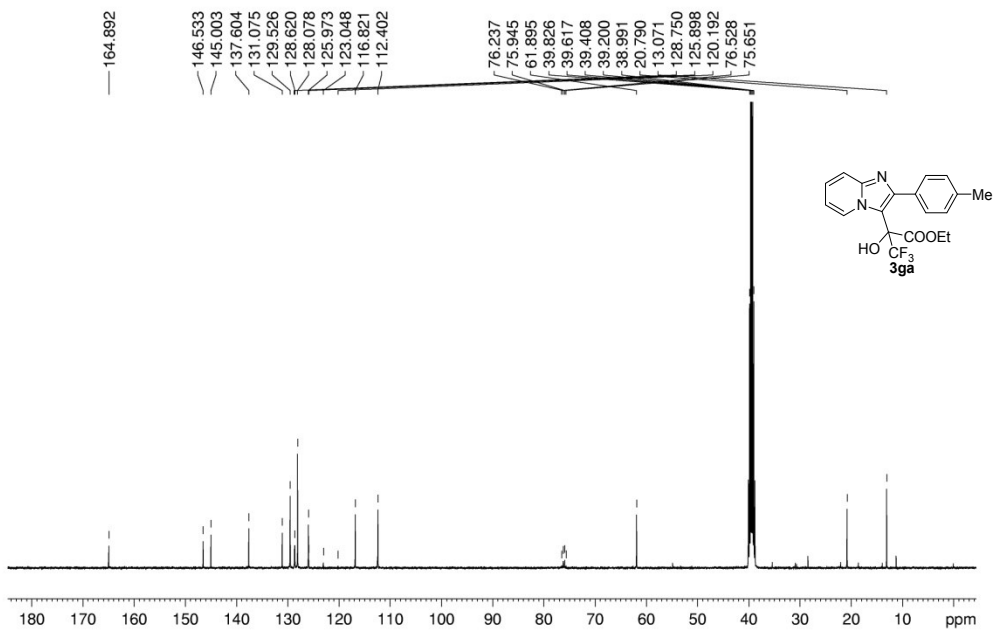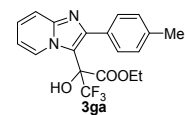

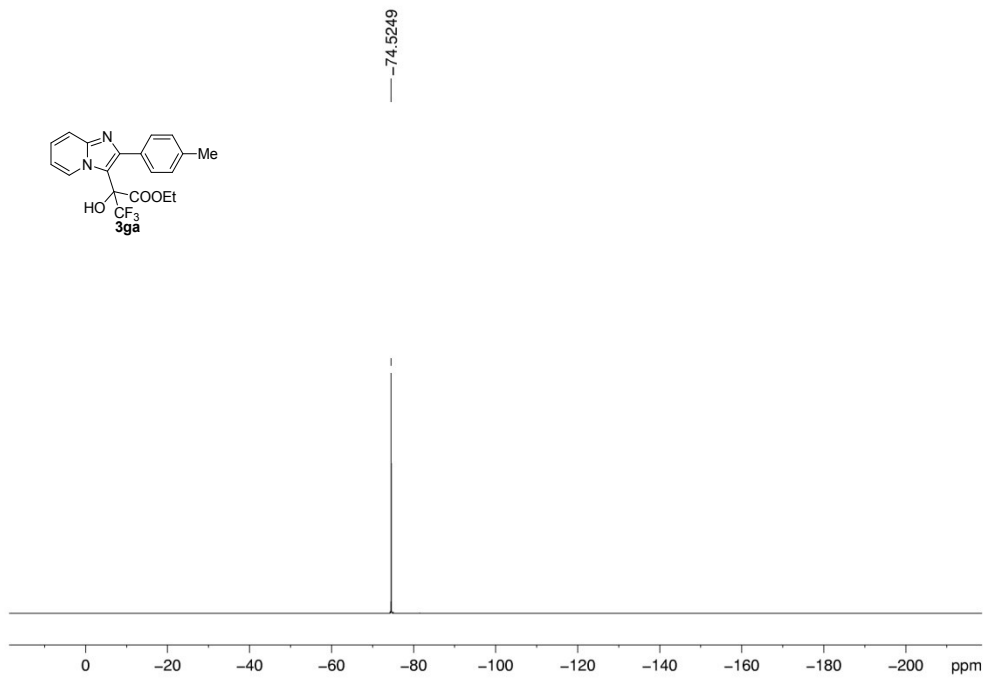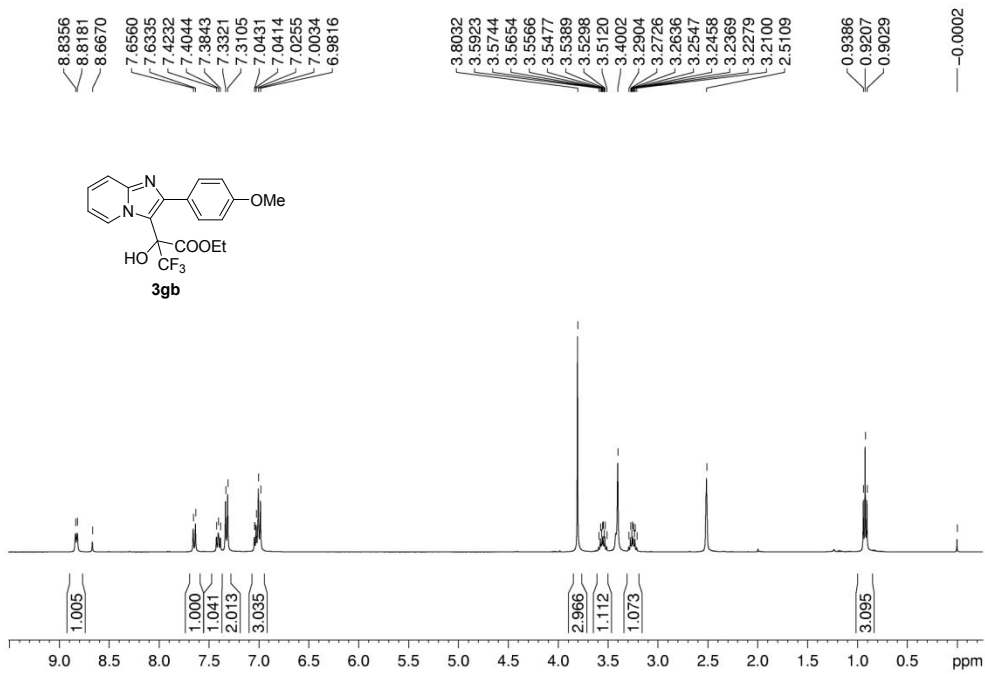

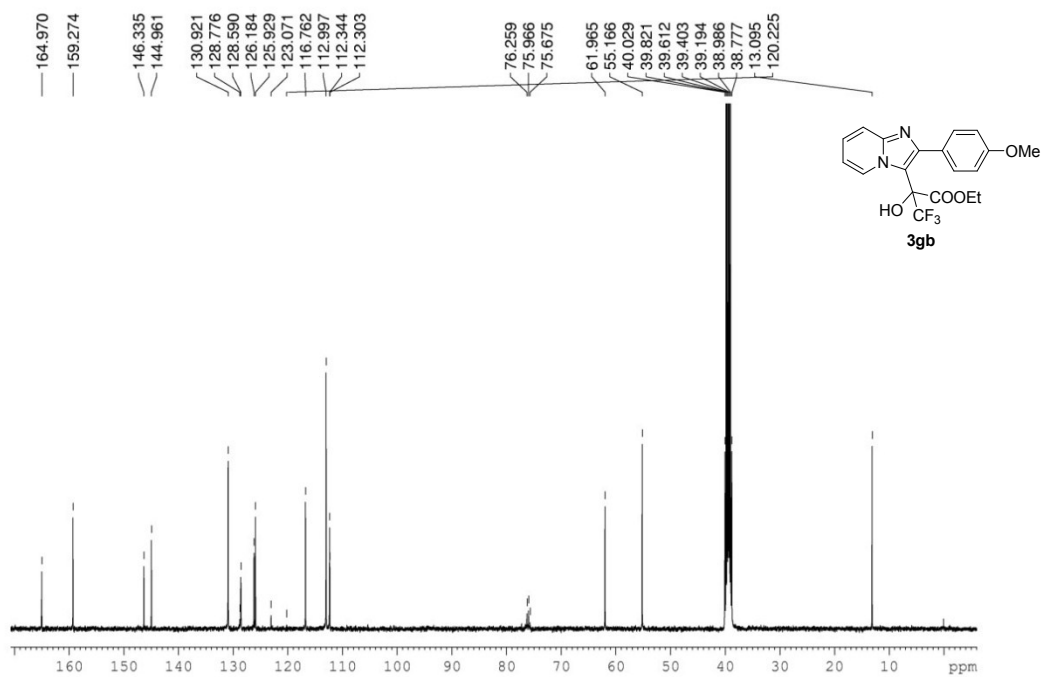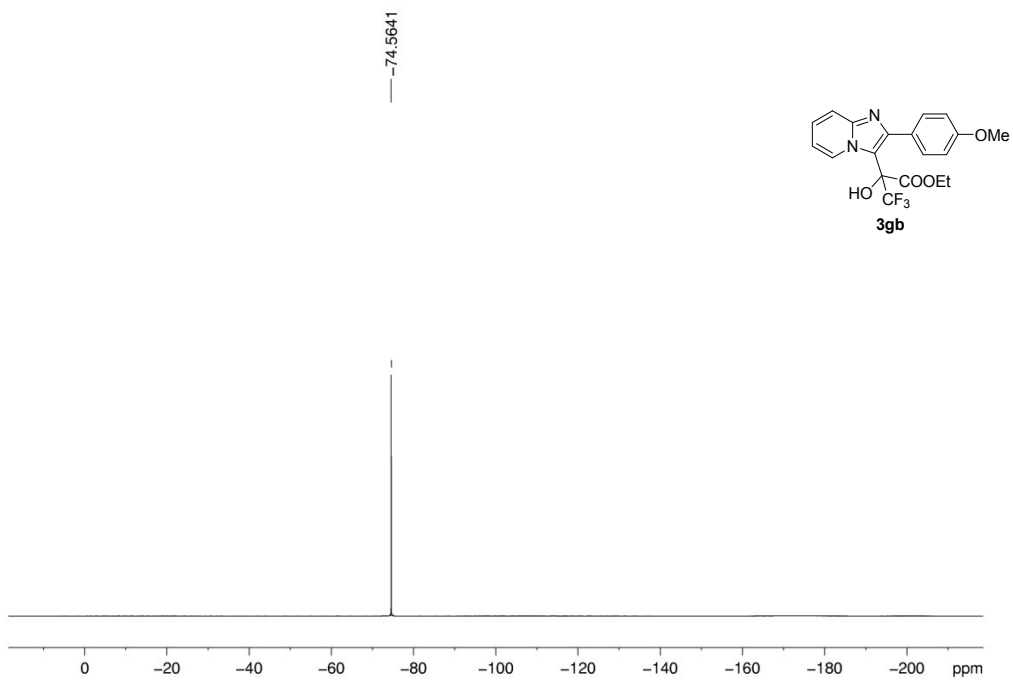

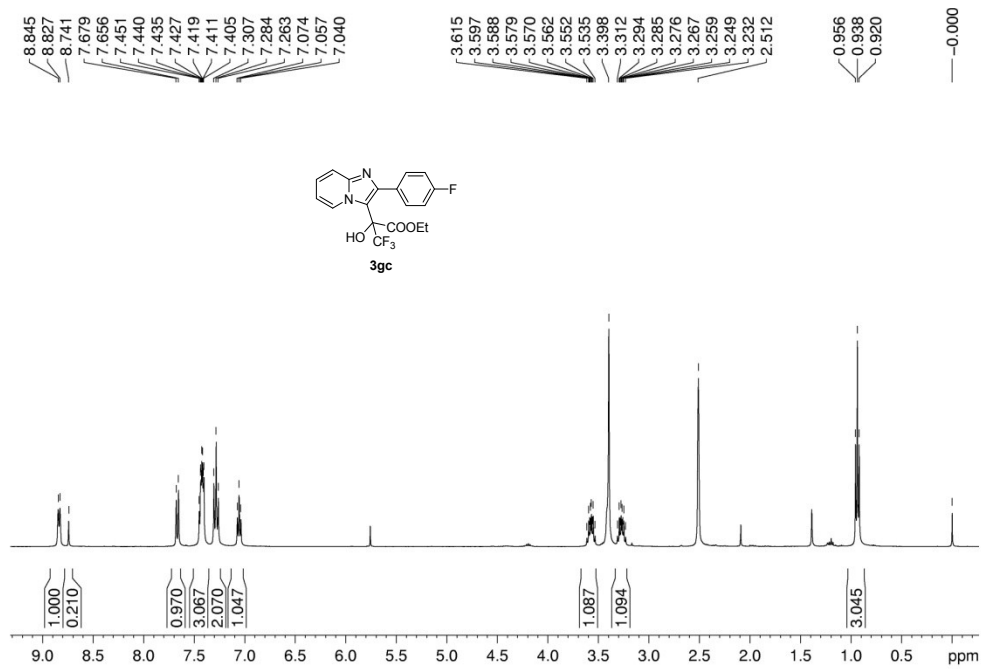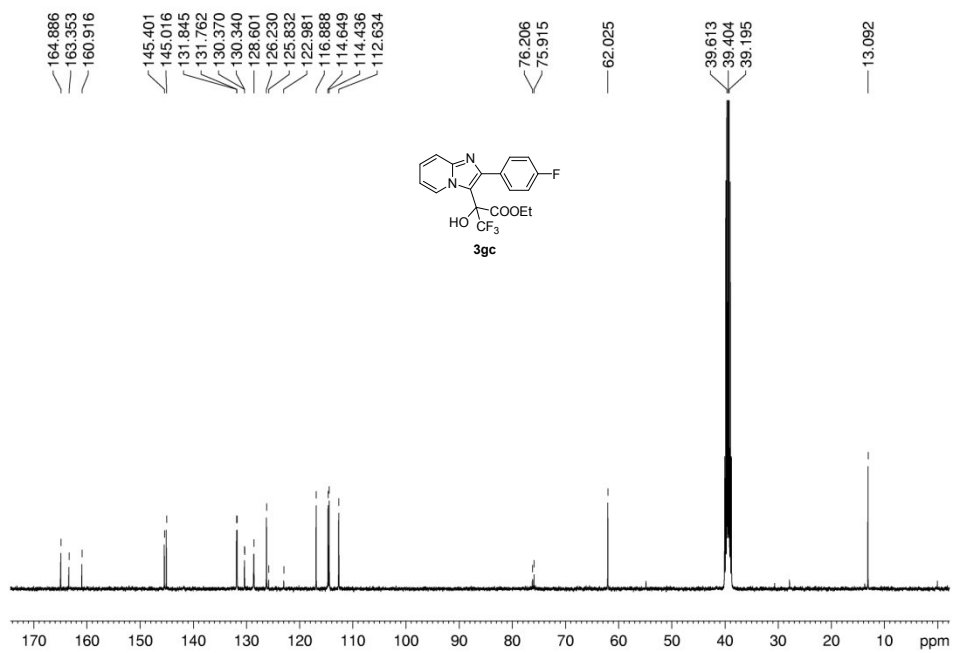



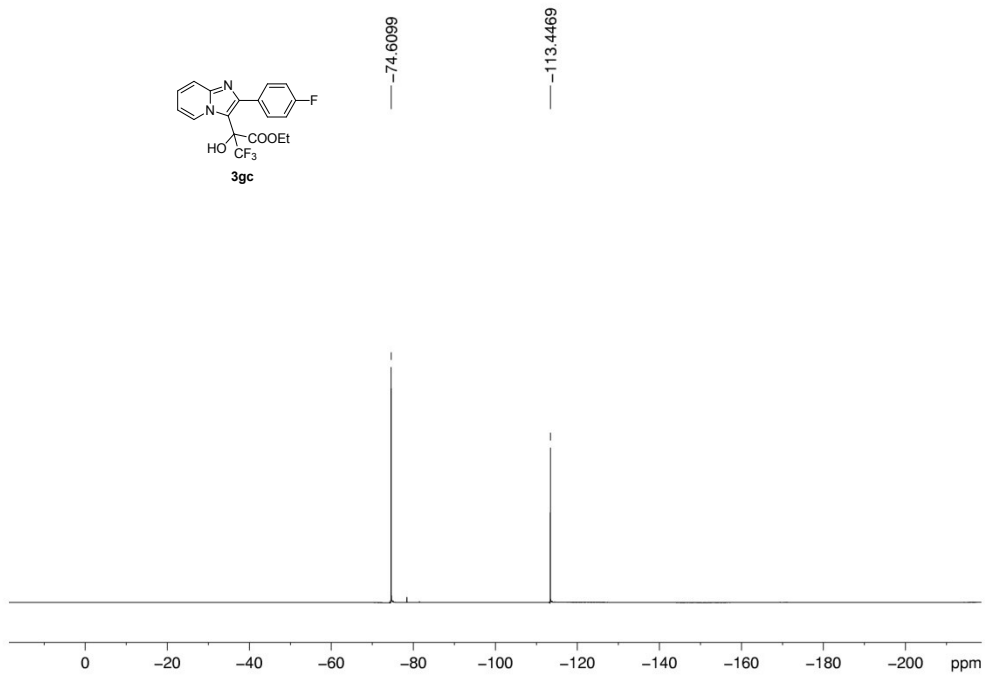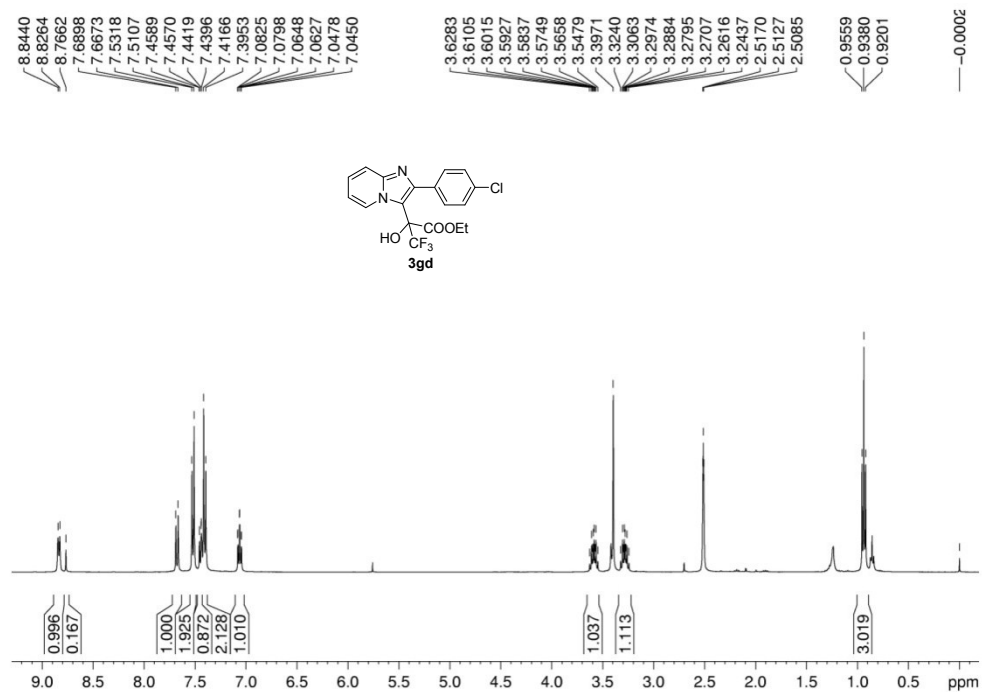

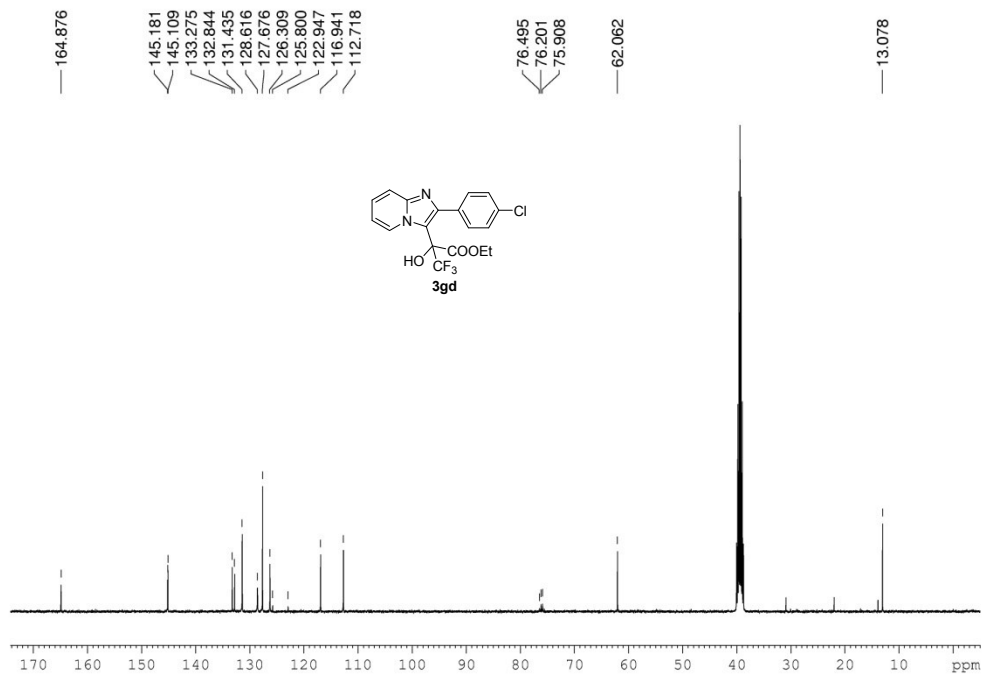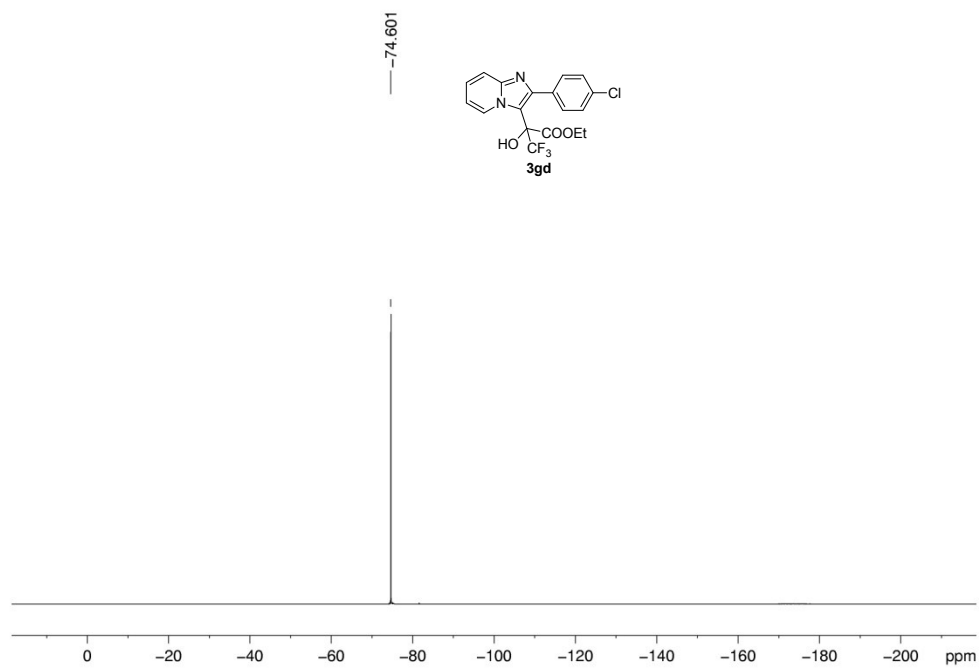

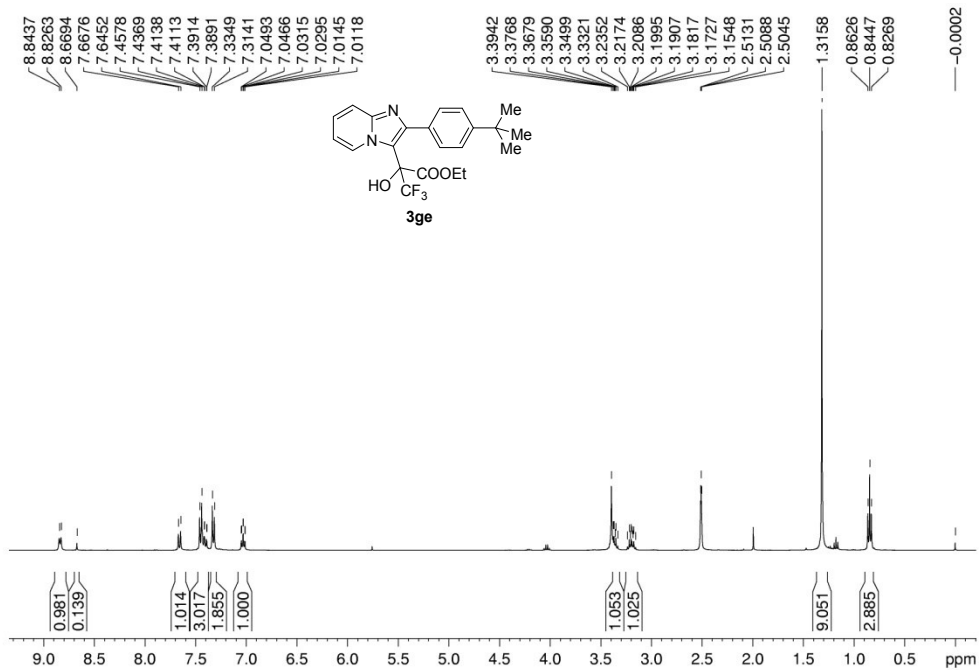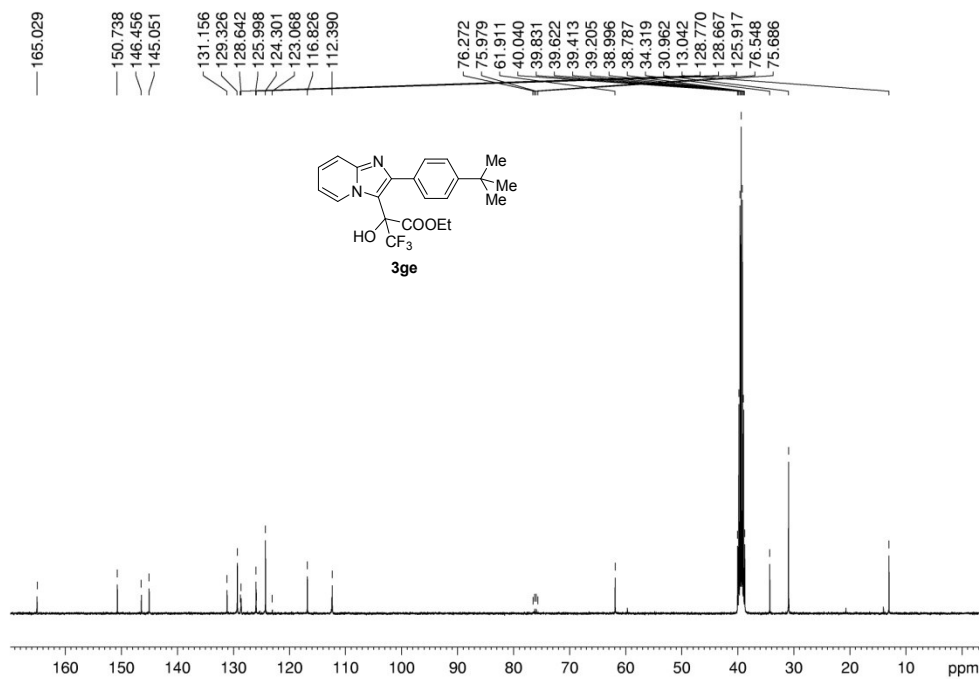

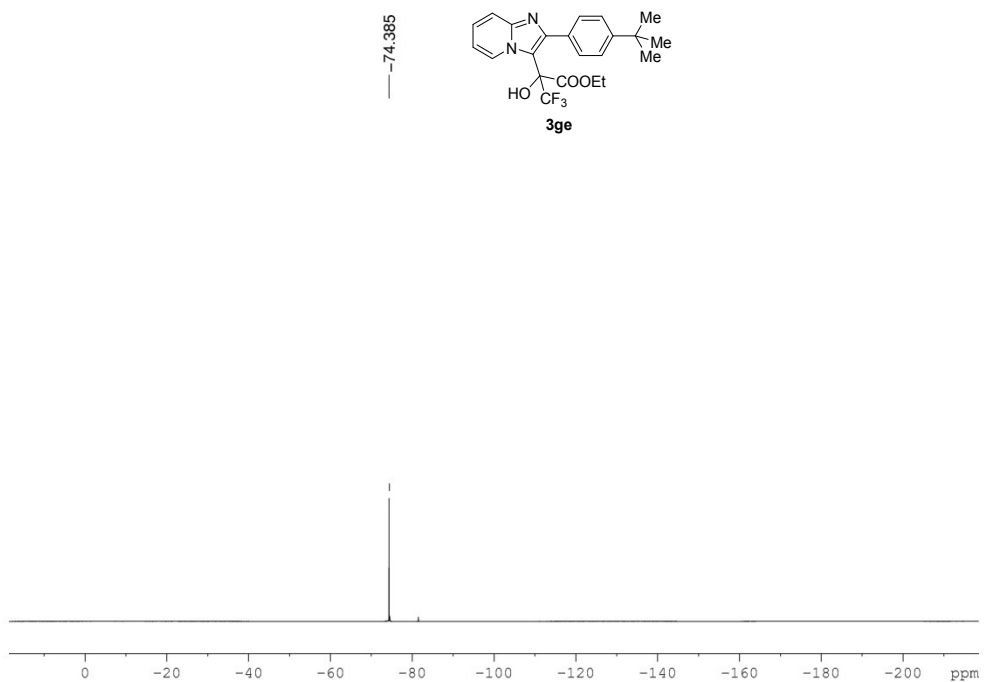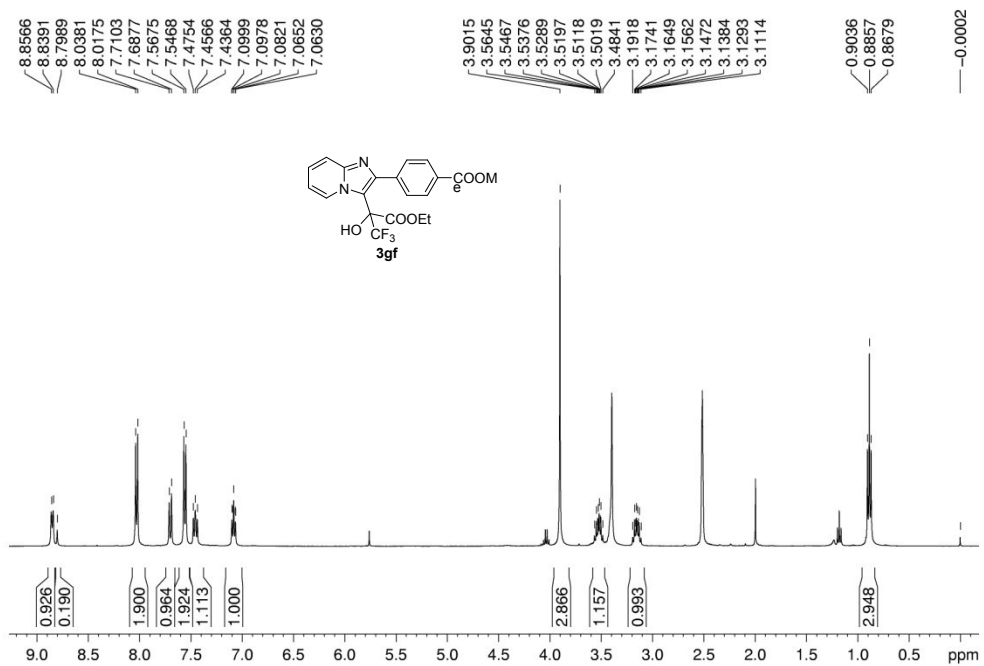

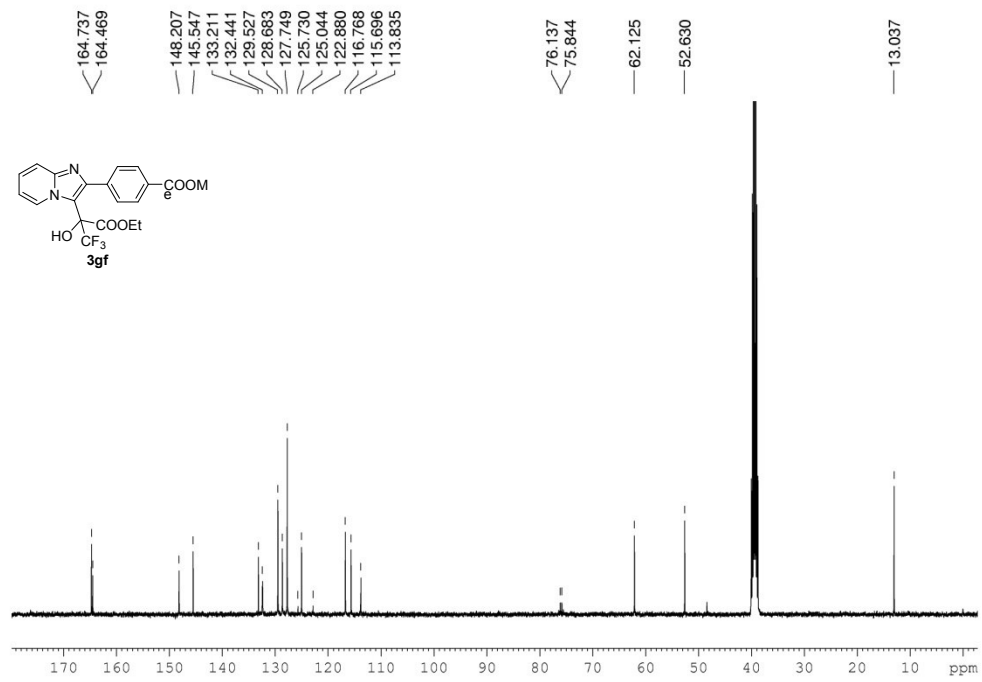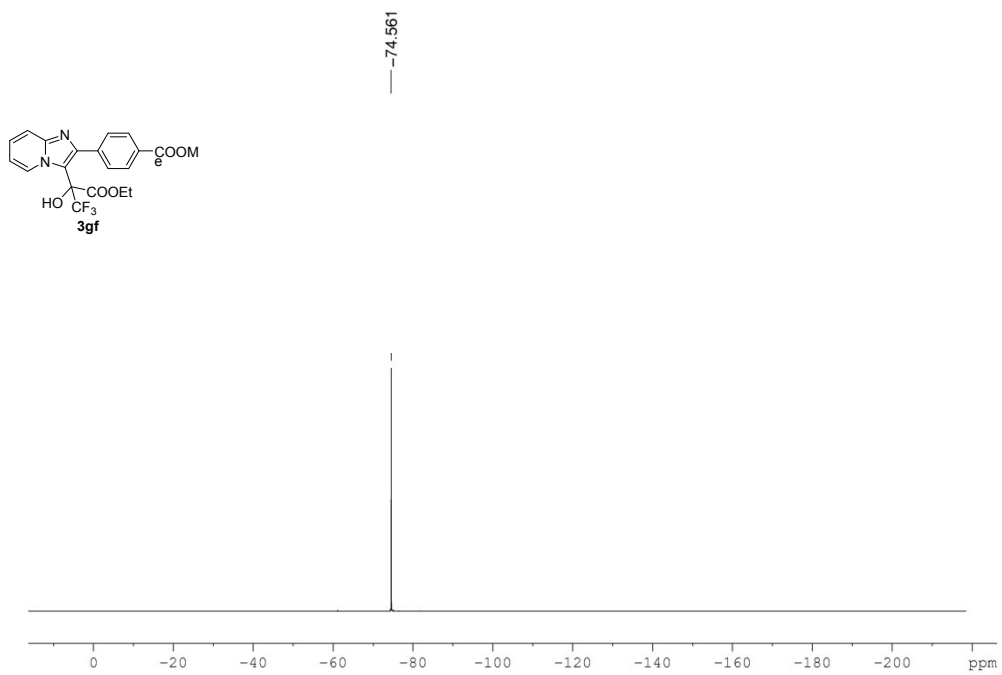

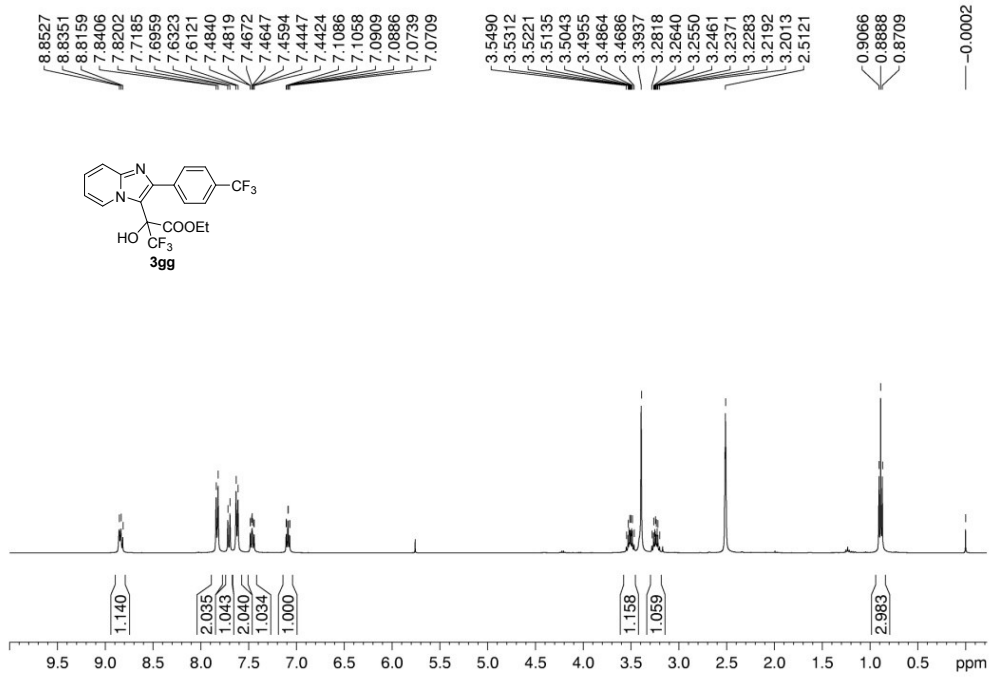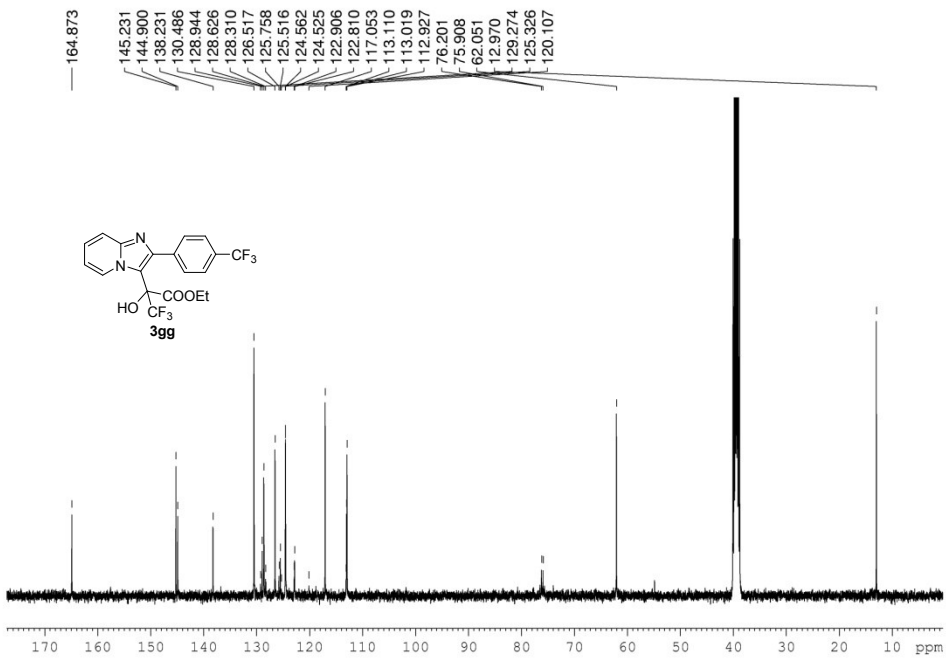

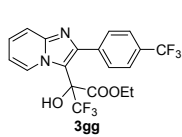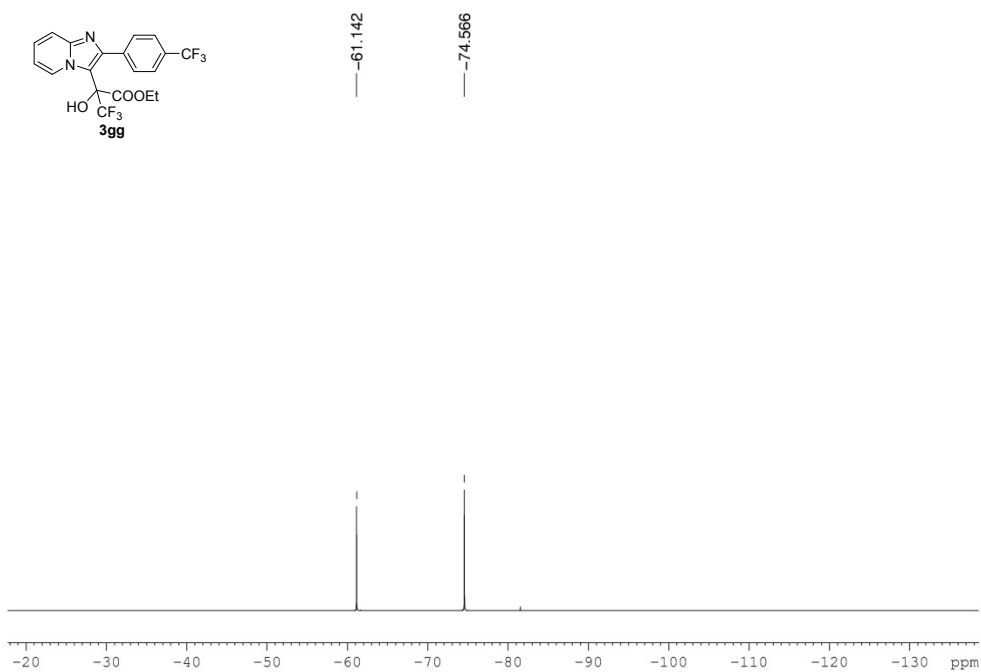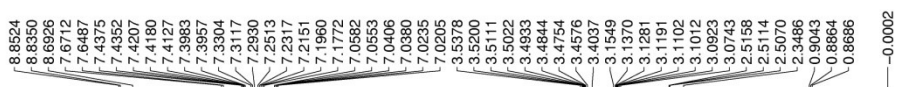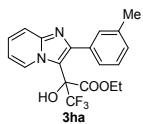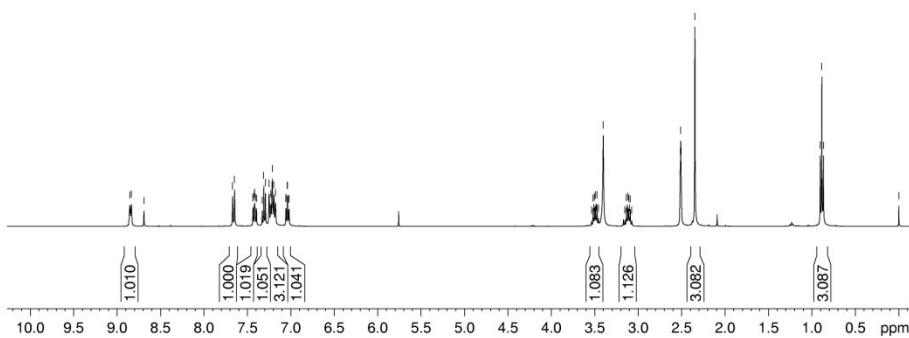

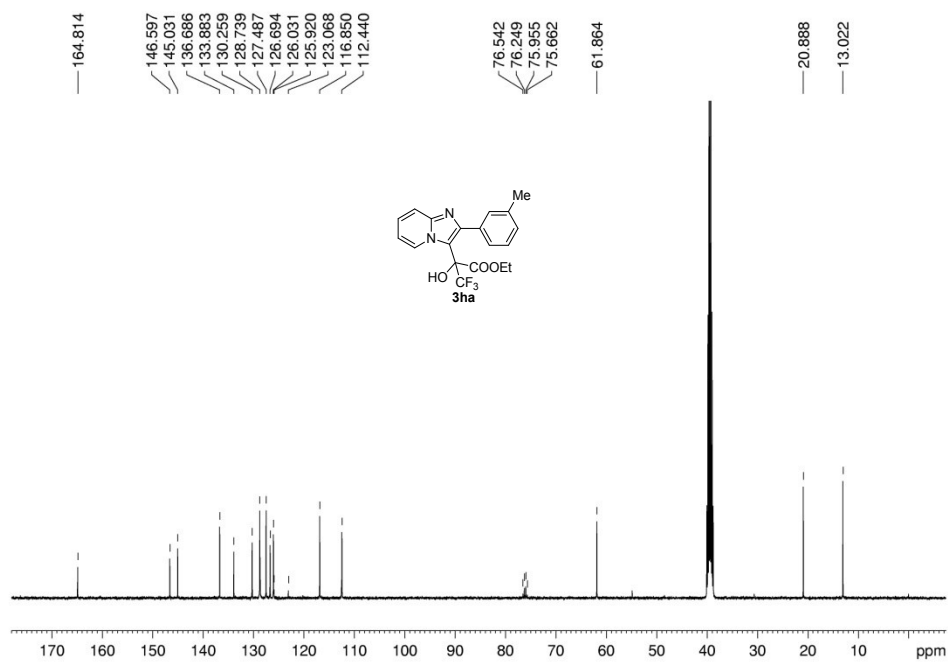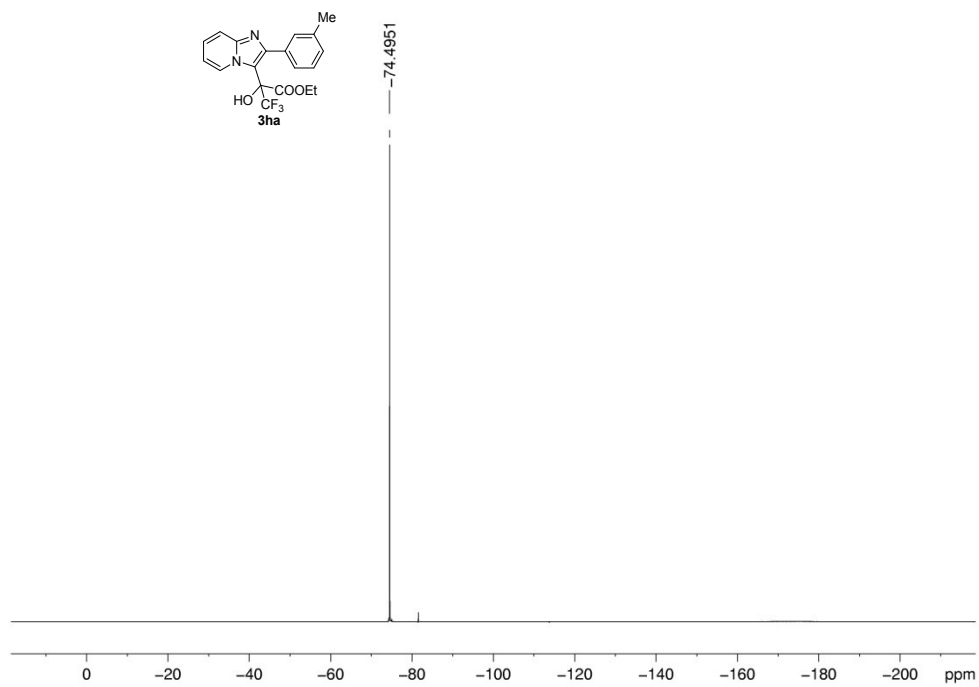



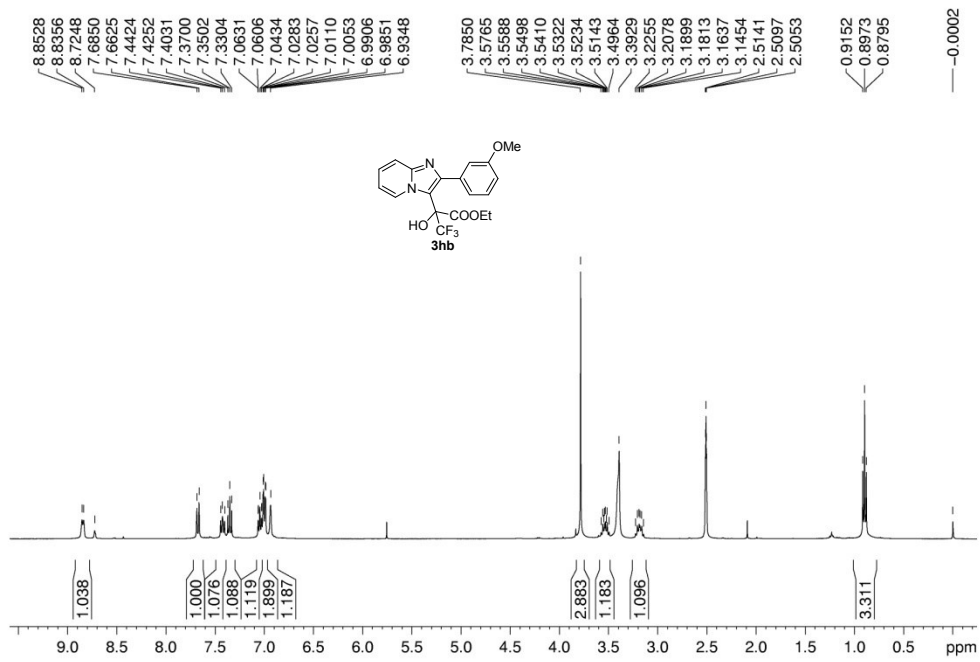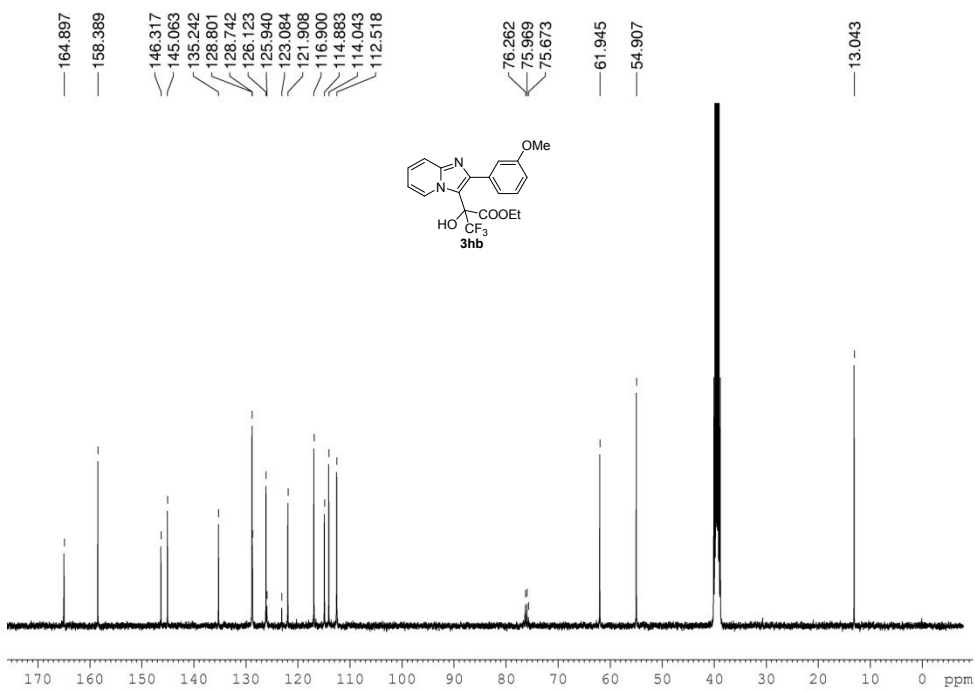

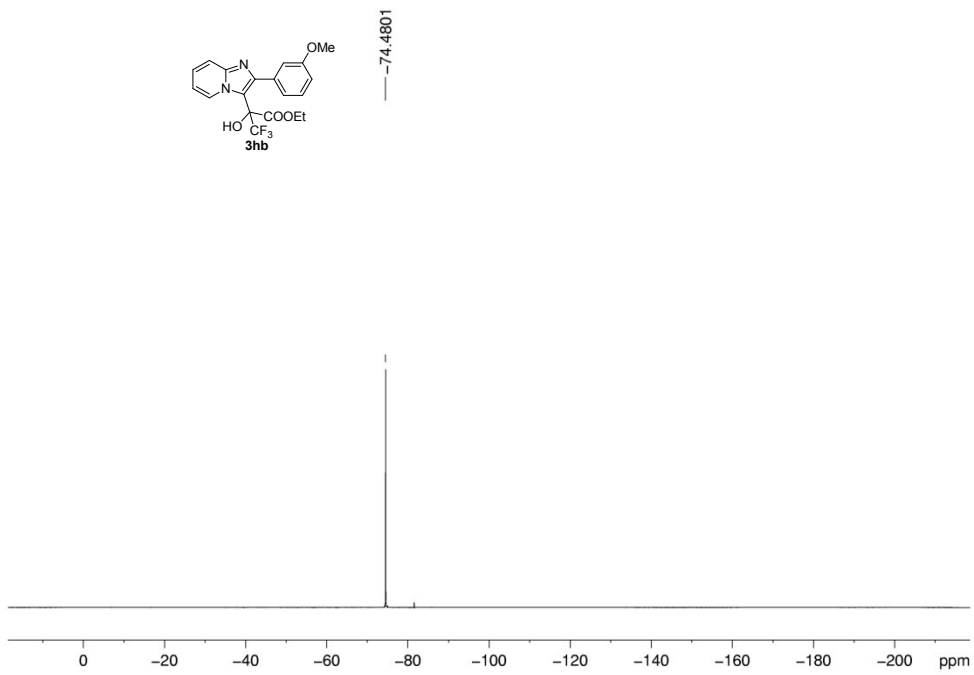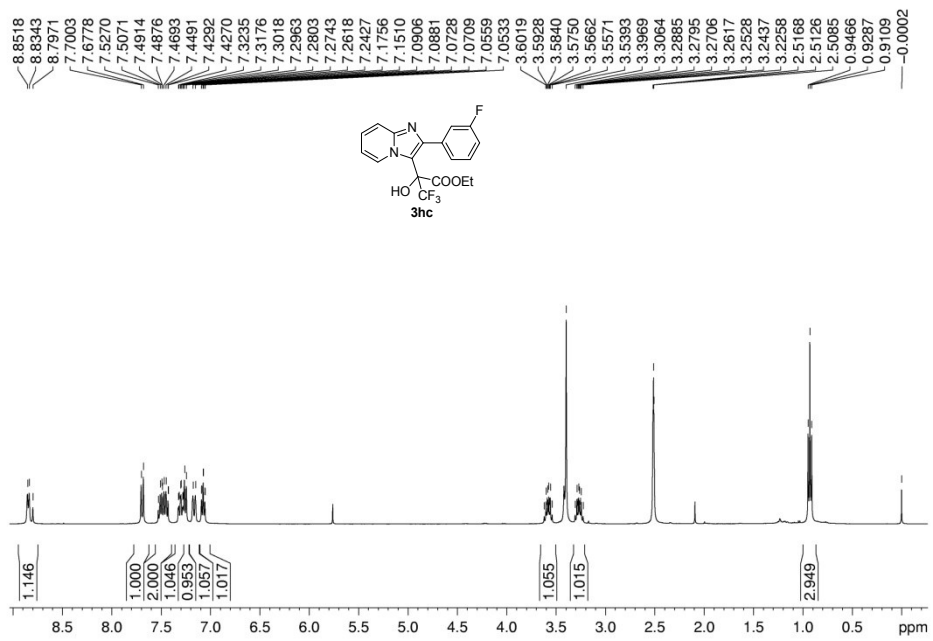

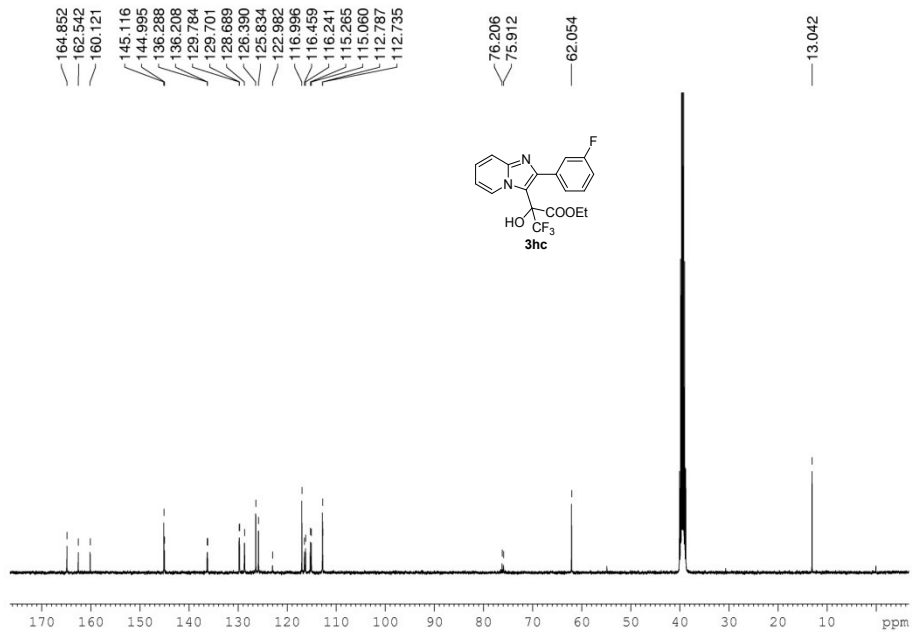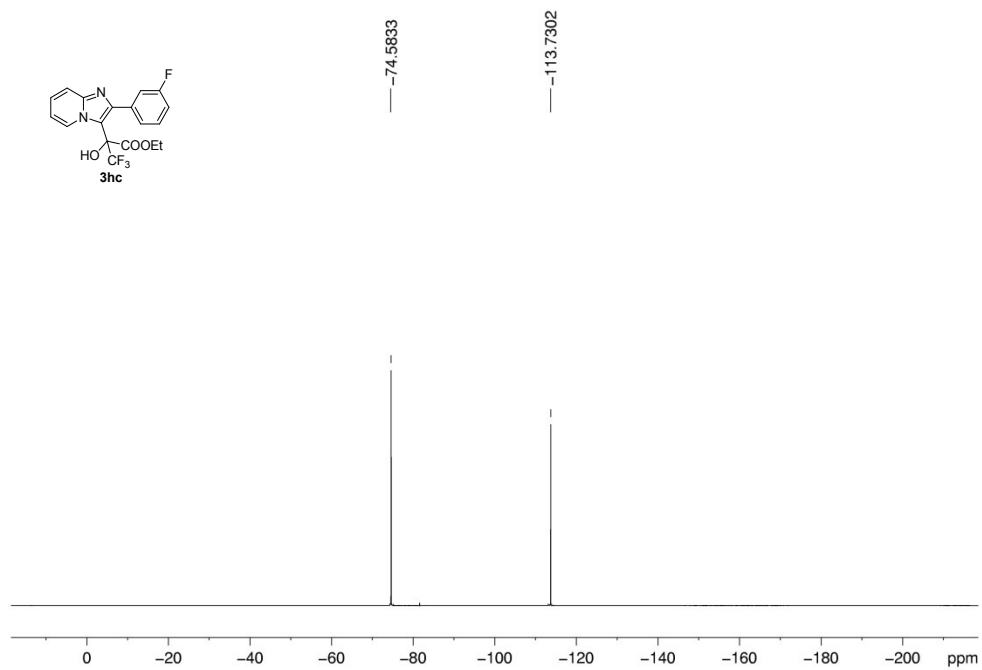

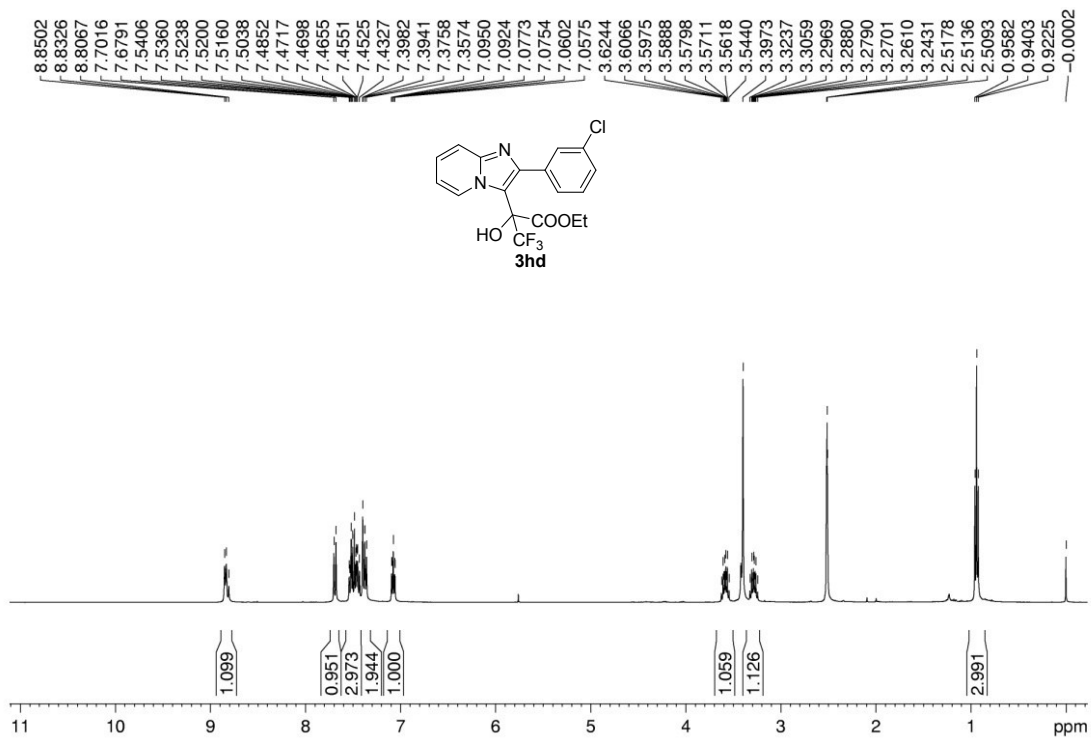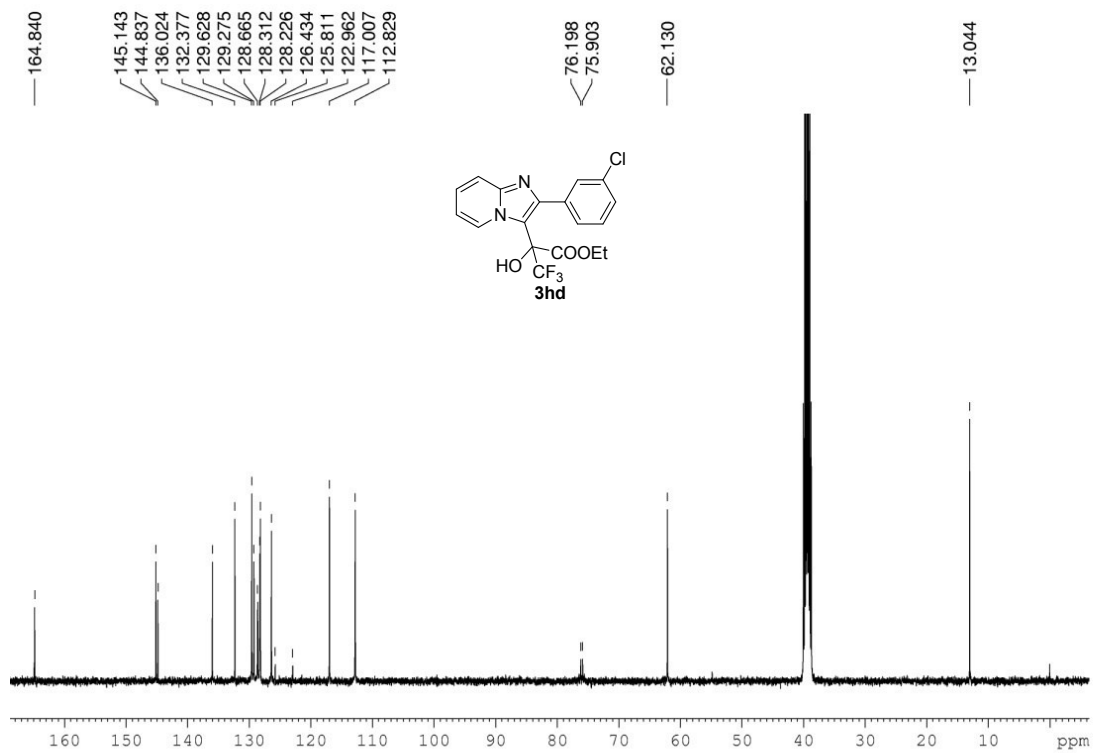

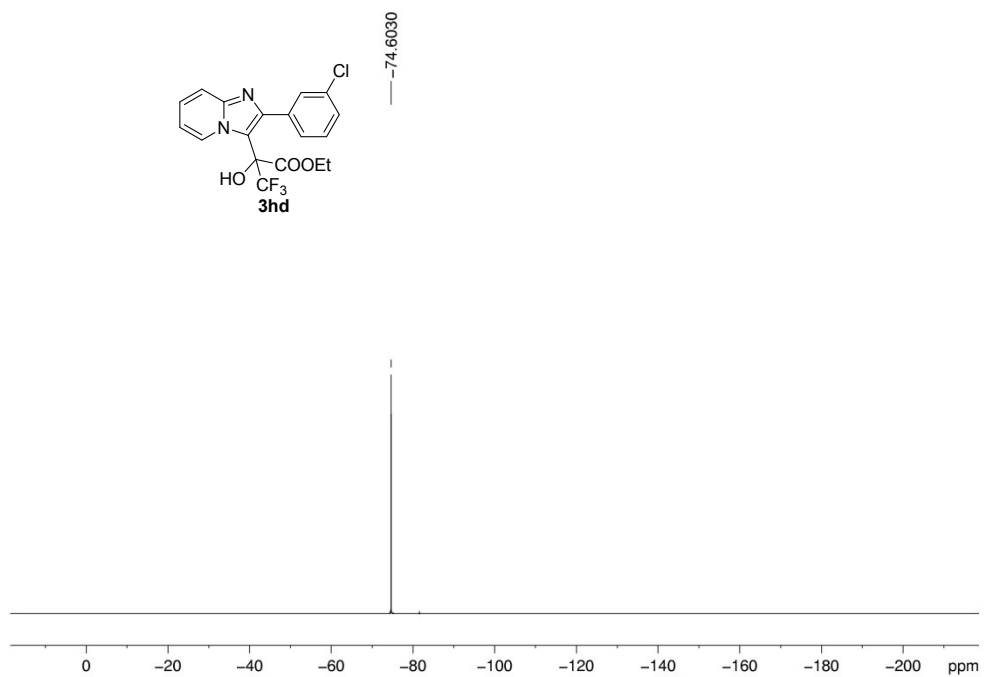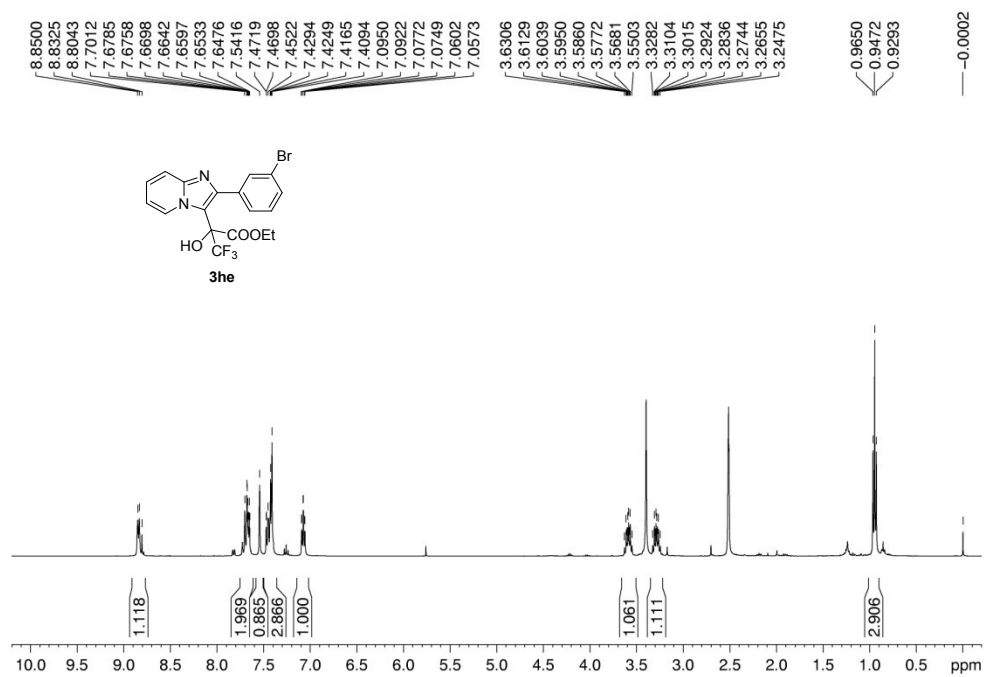

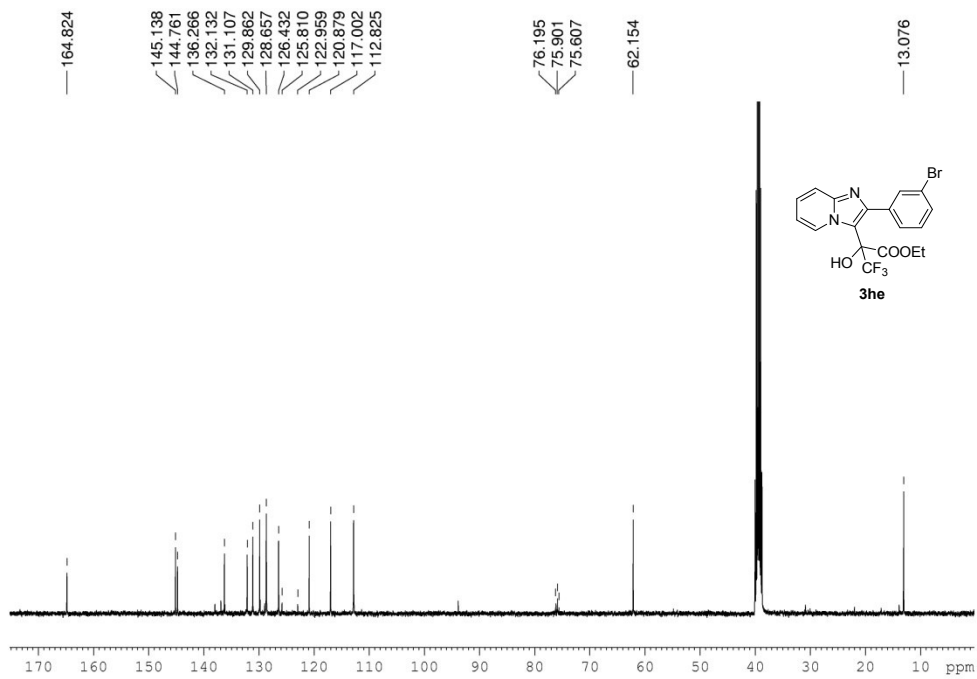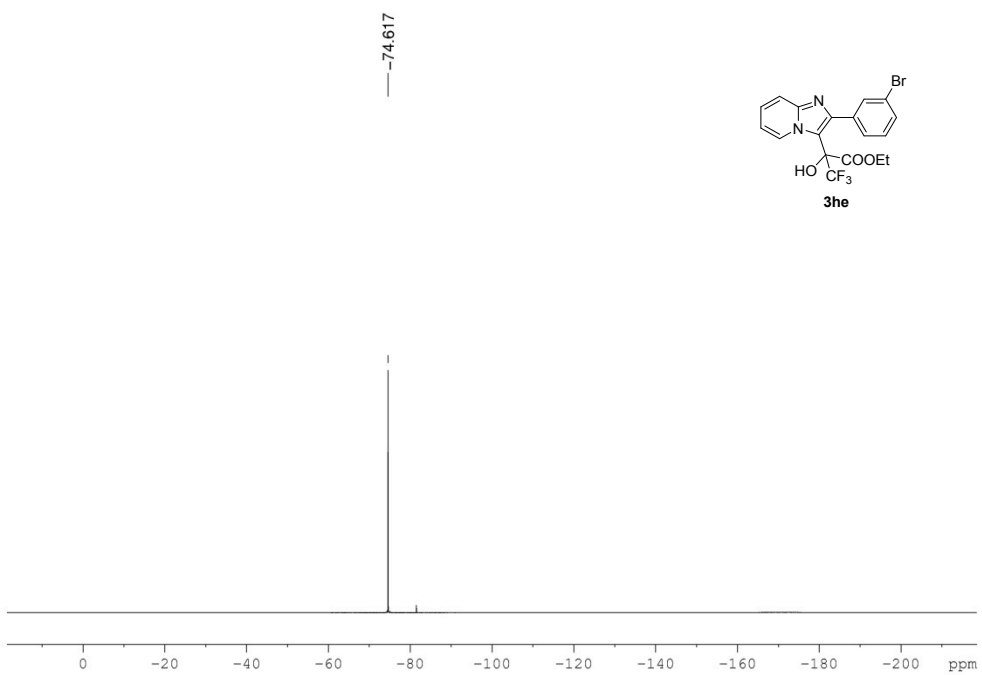

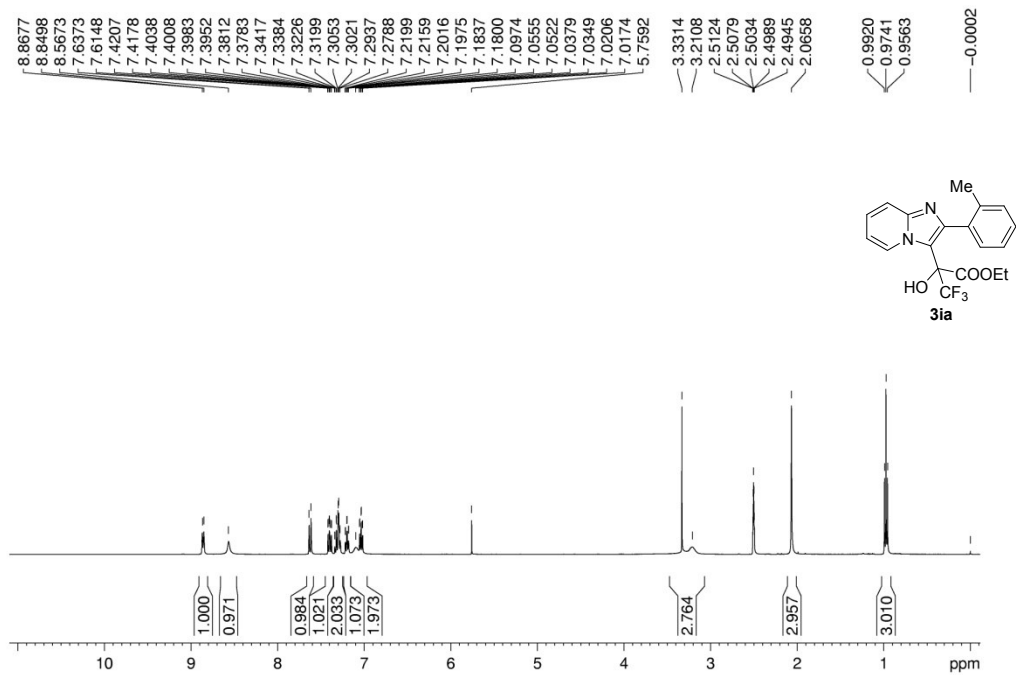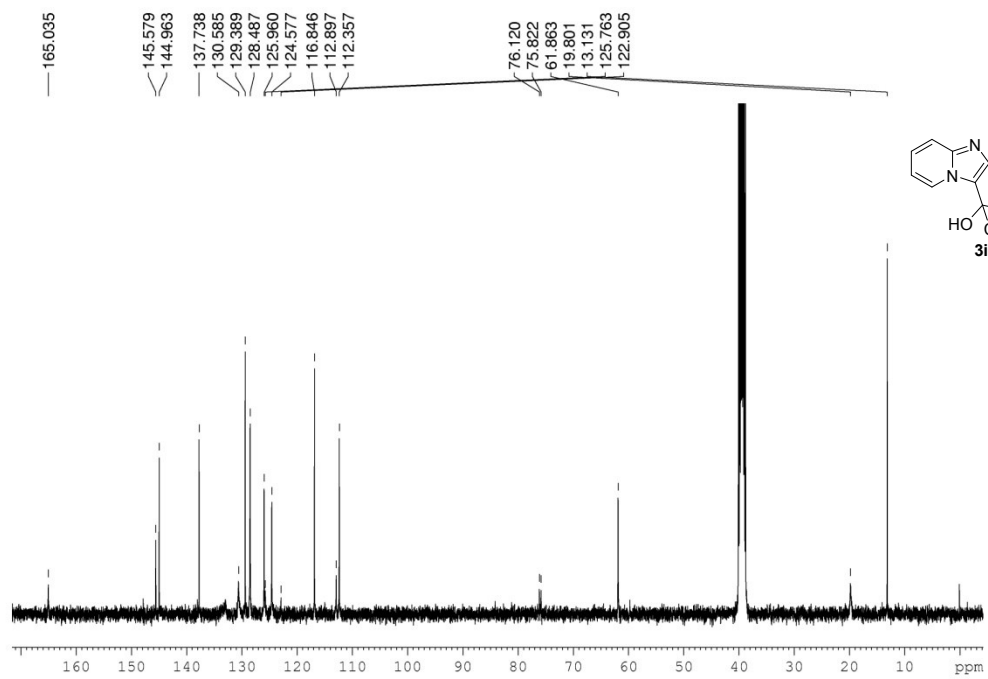

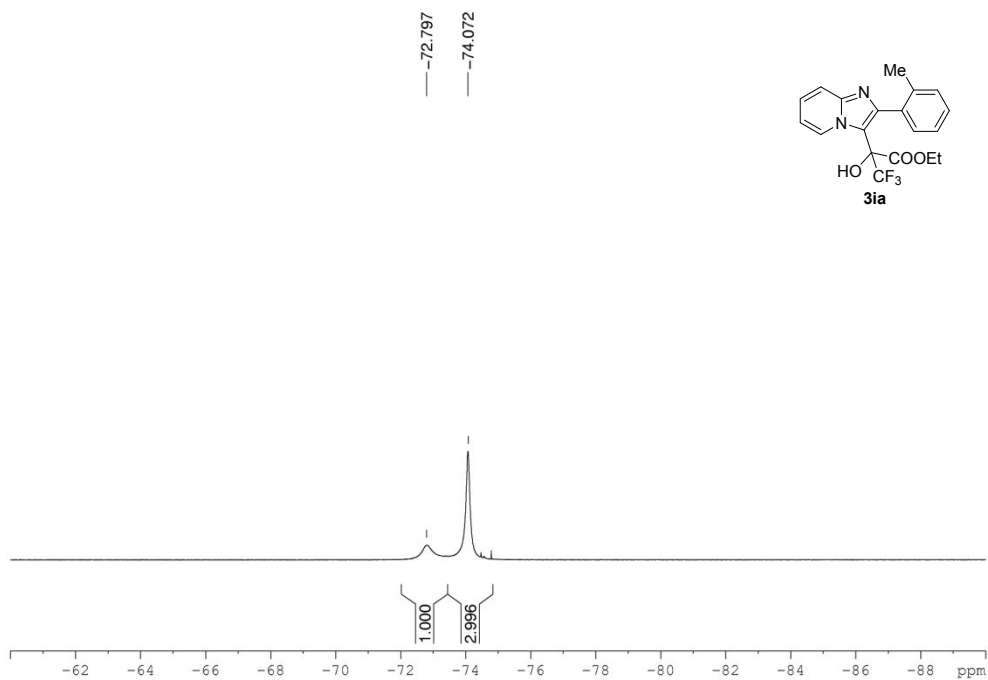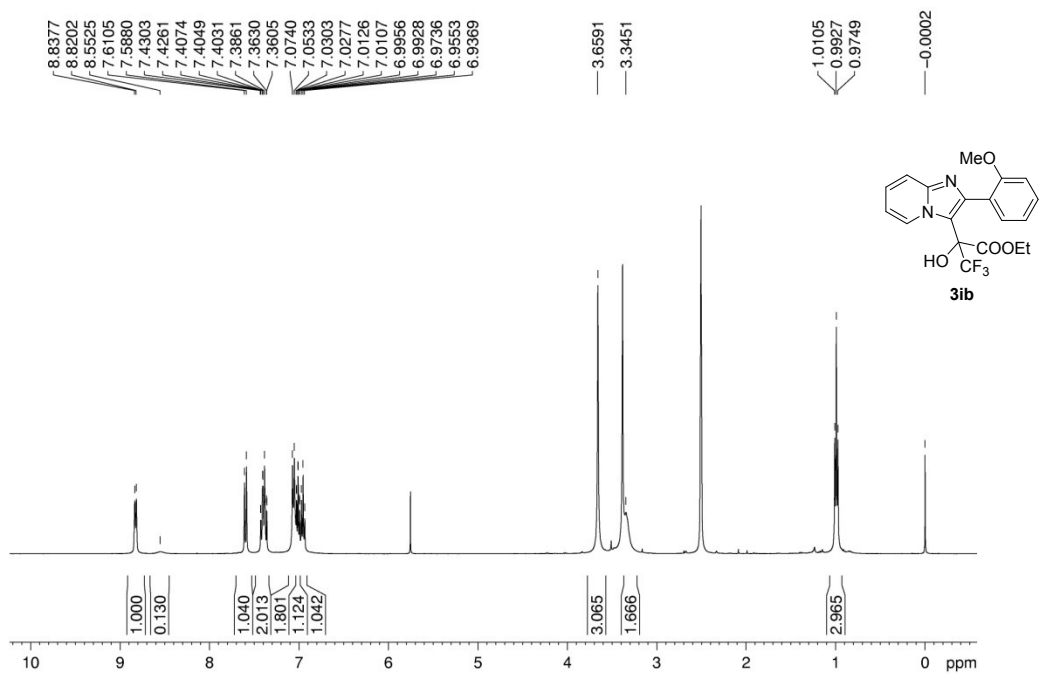



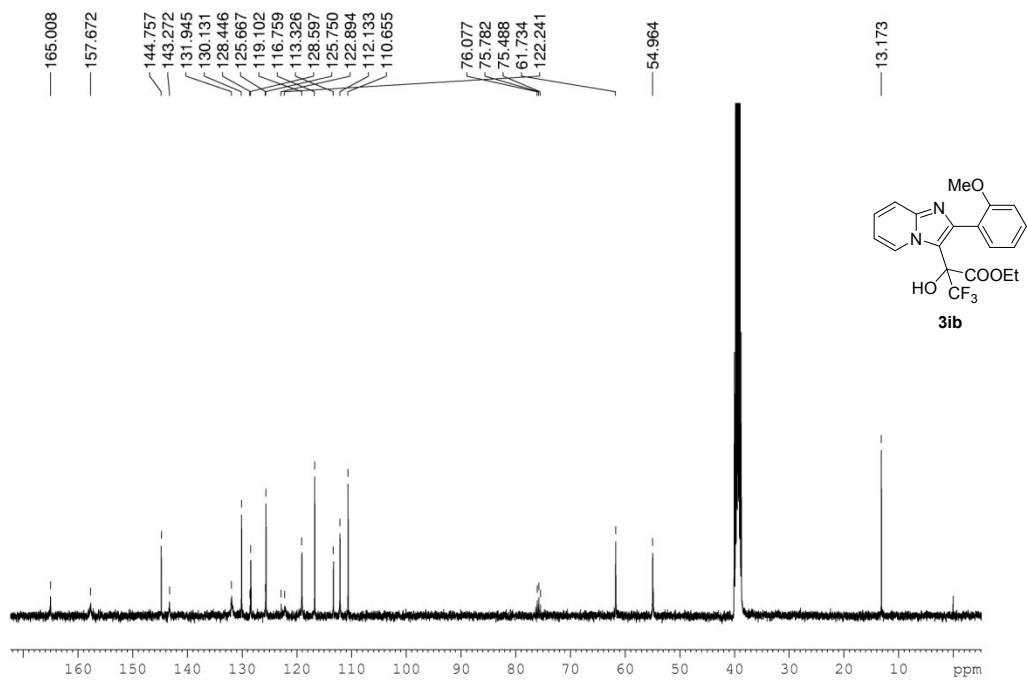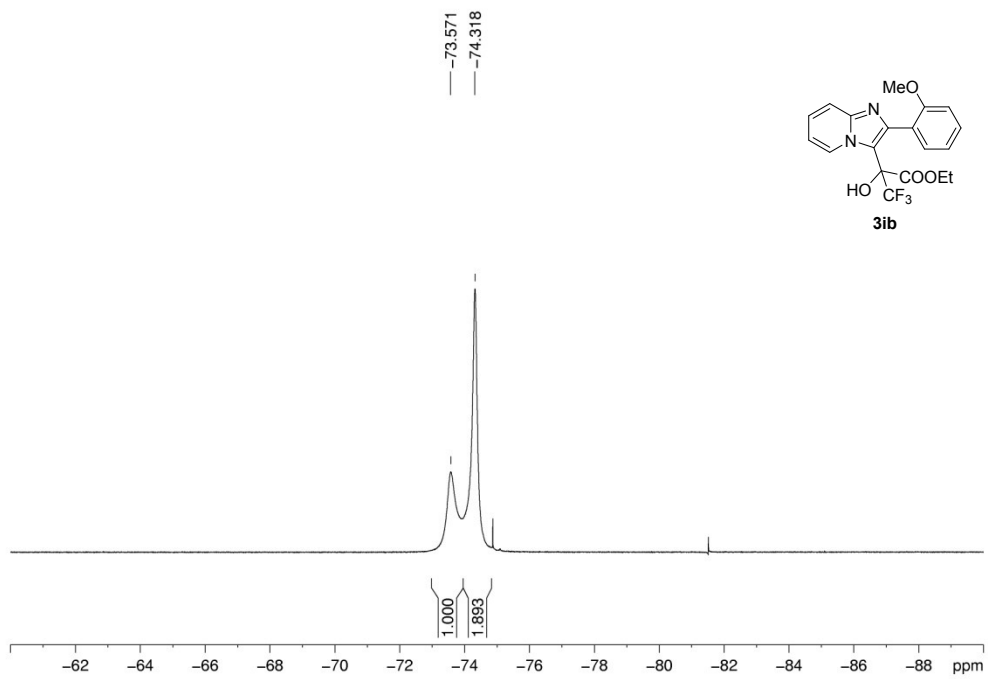

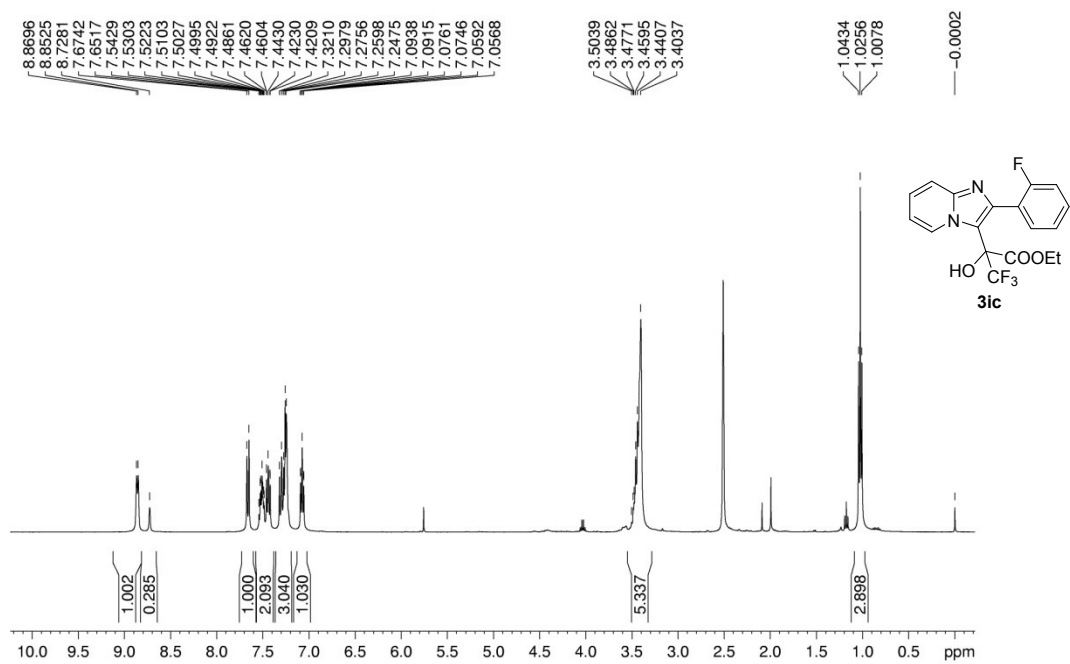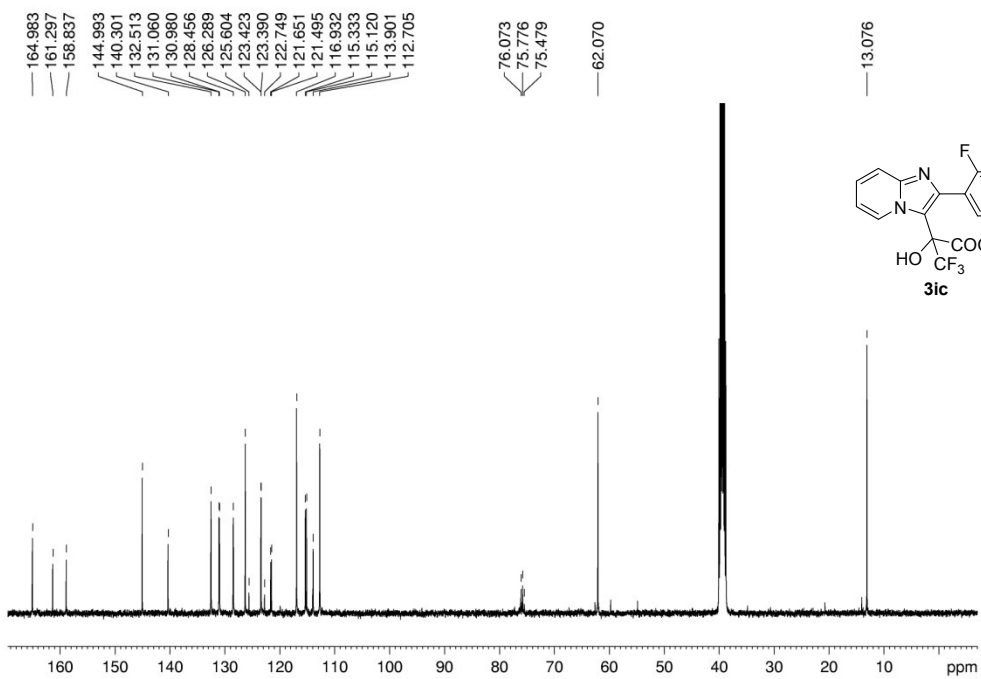

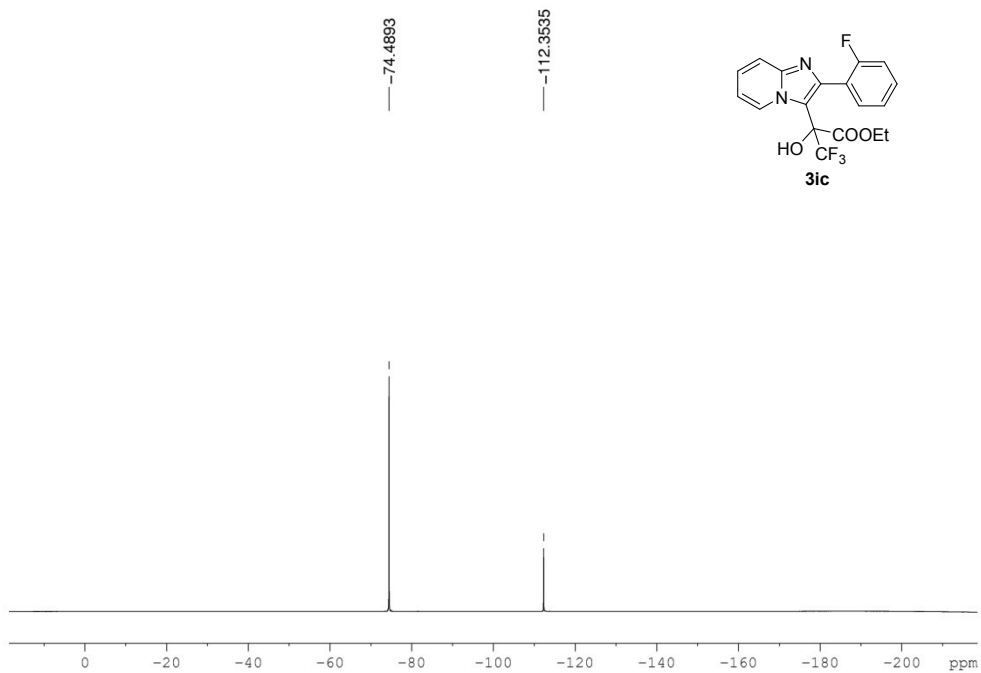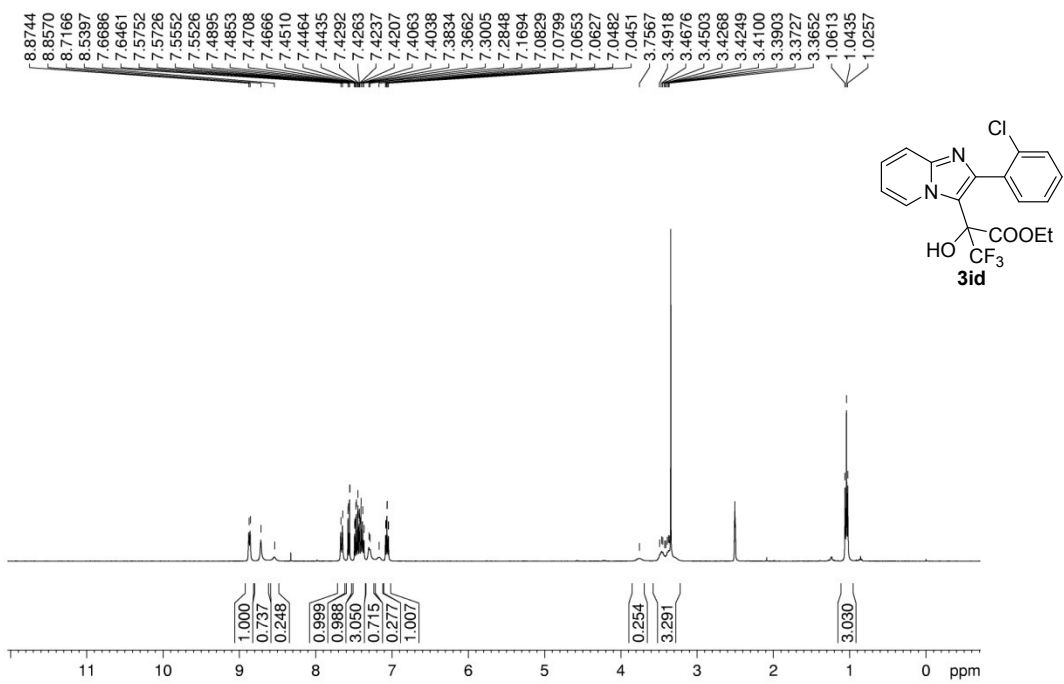

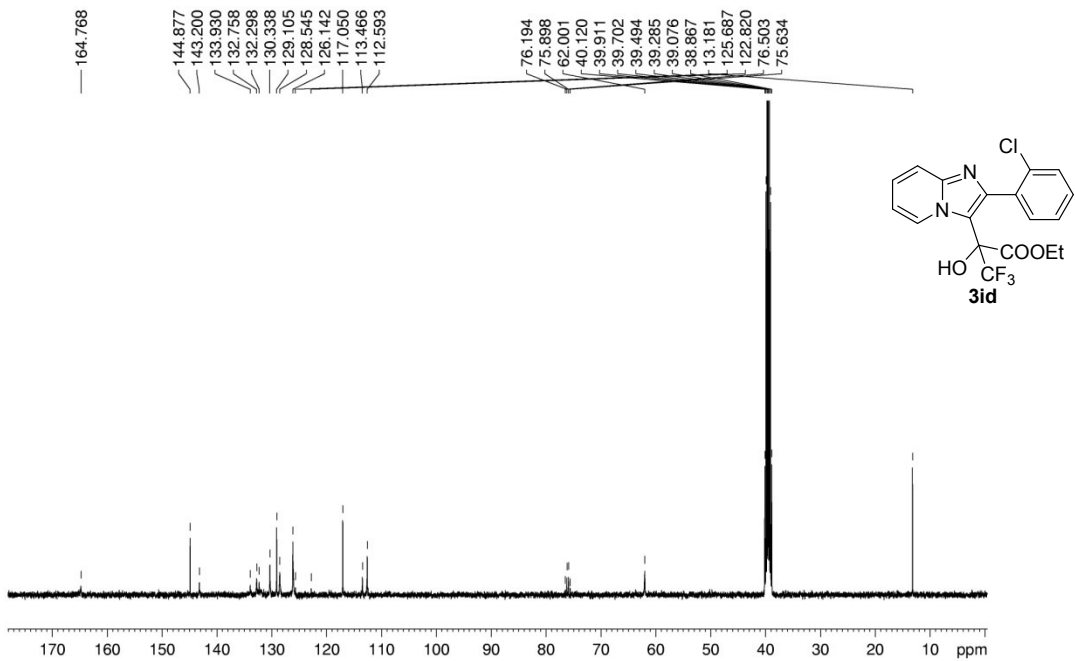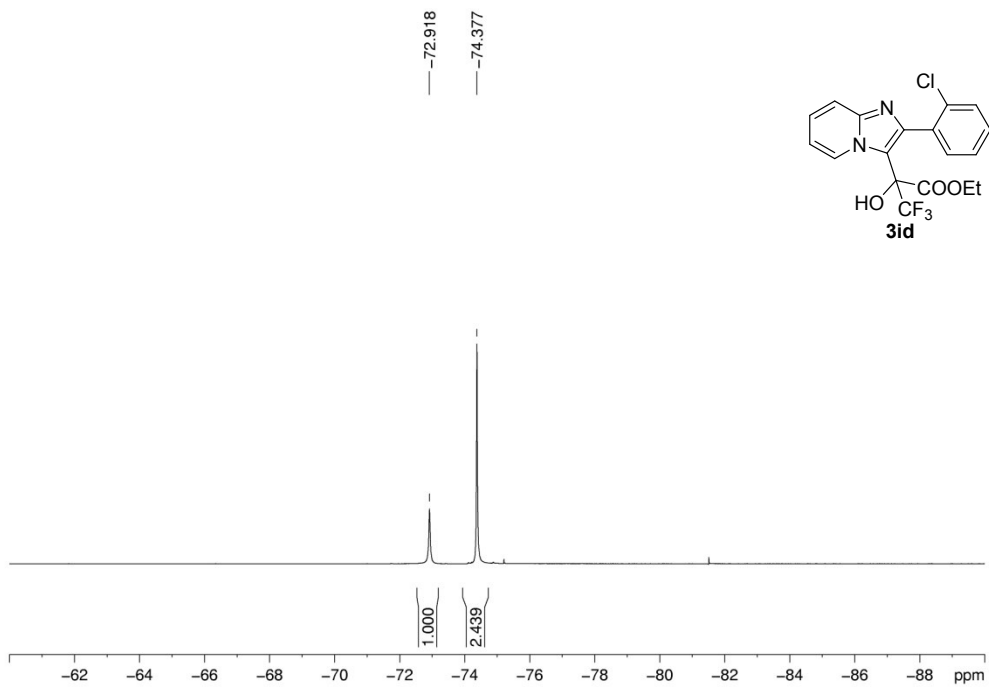

Supplement: c5ra15678e1.pdf [file c5ra15678e1.pdf]
